# Supplementary figures and images for: Development of 3-alkyl-6-methoxy-7-hydroxy-chromones (AMHCs) from natural isoflavones, a new class of fluorescent scaffolds for biological imaging
Source: Royal Society of Chemistry journal article supplement (doi:10.1039/c4cc06762b), 2014-11-21

### Copies of NMR spectra of all the synthesized compounds

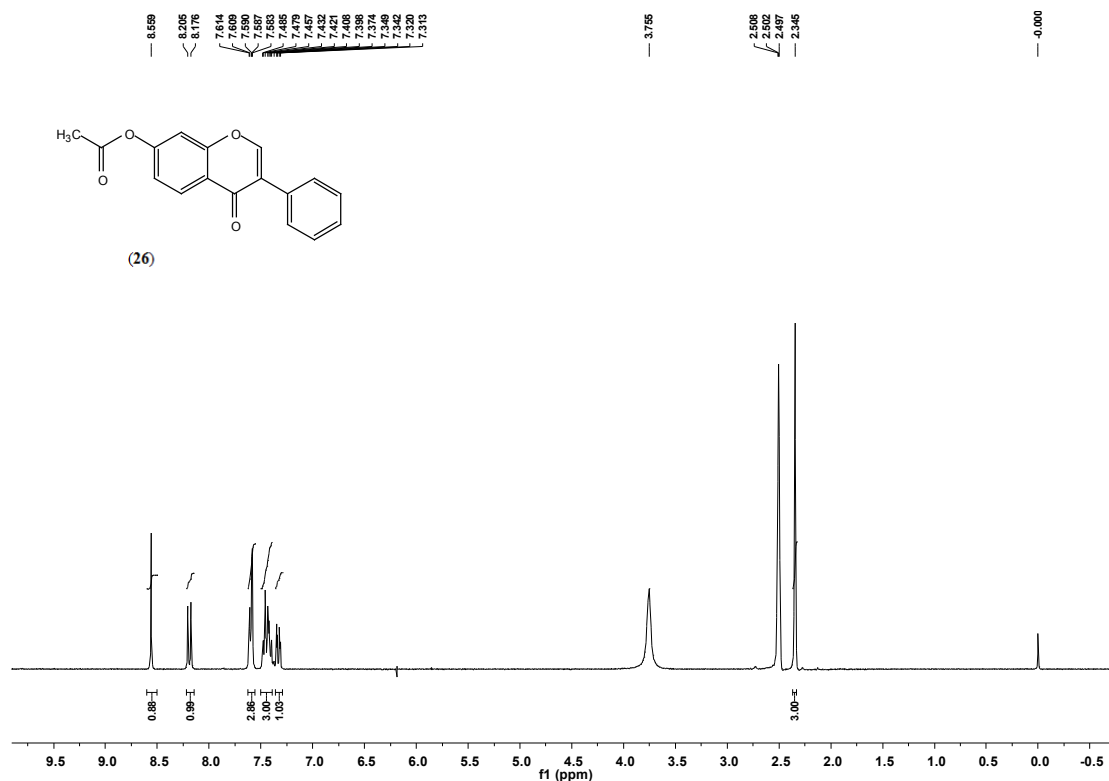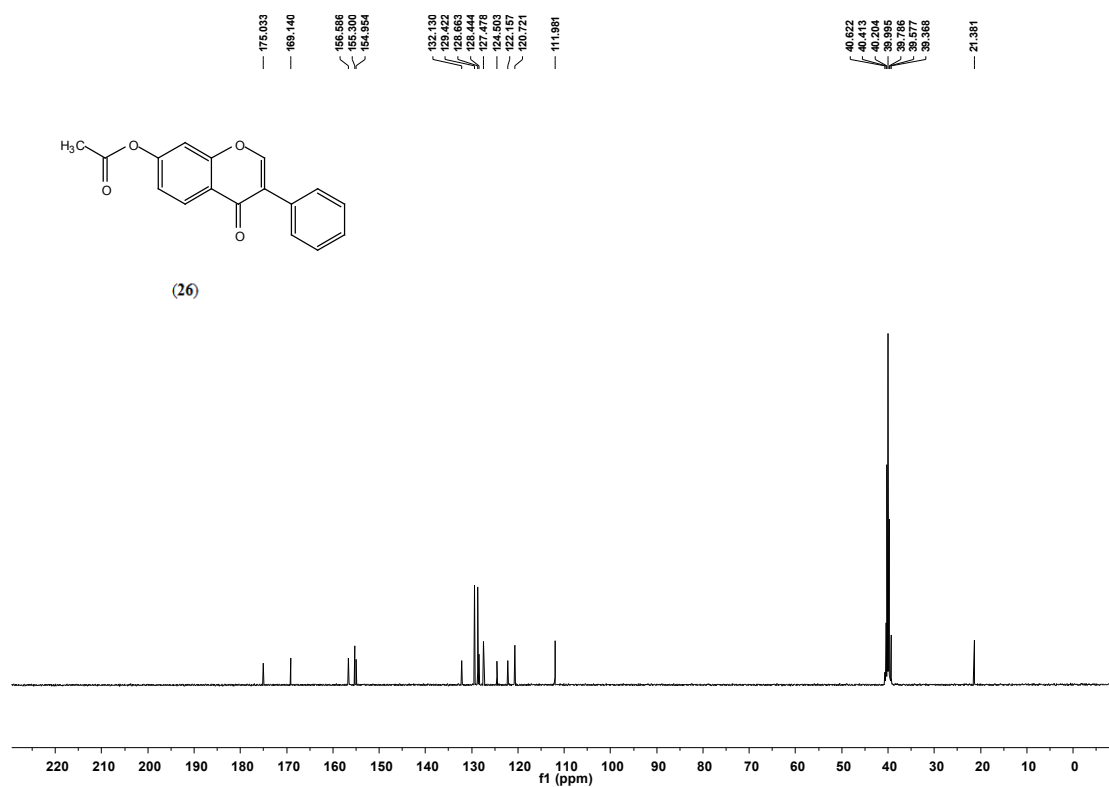

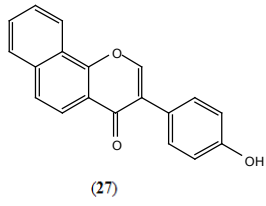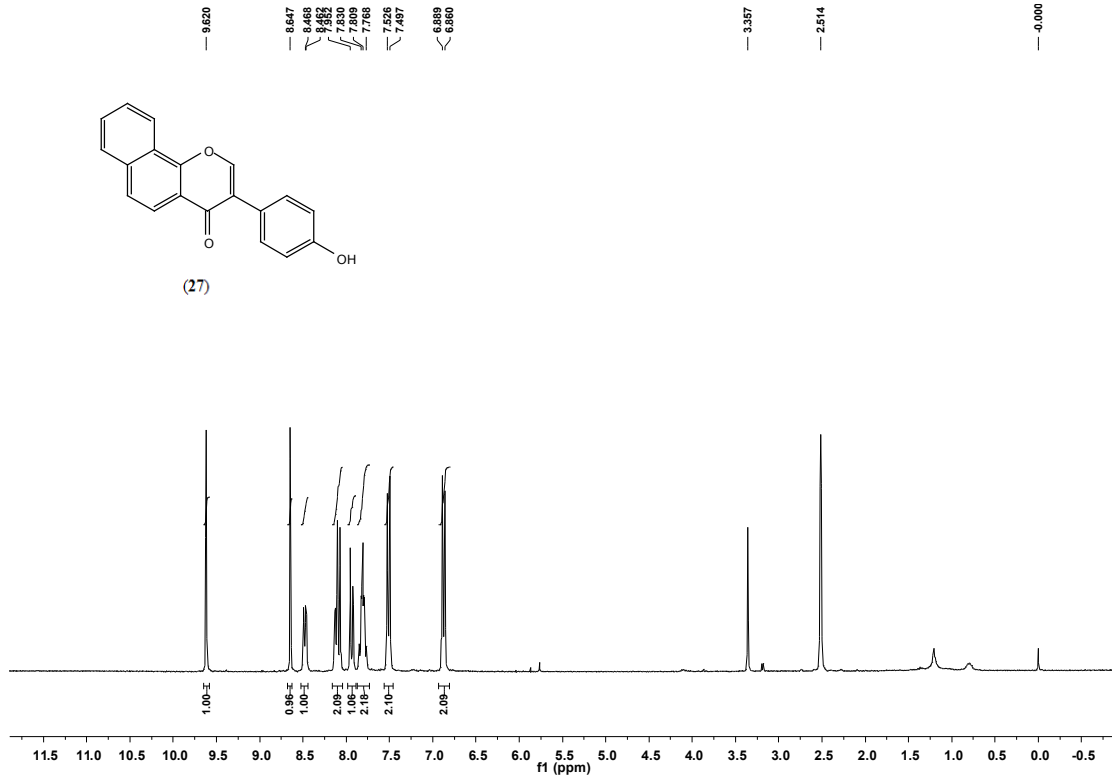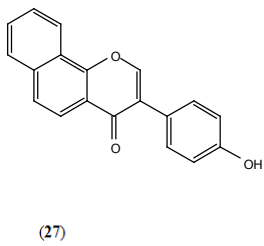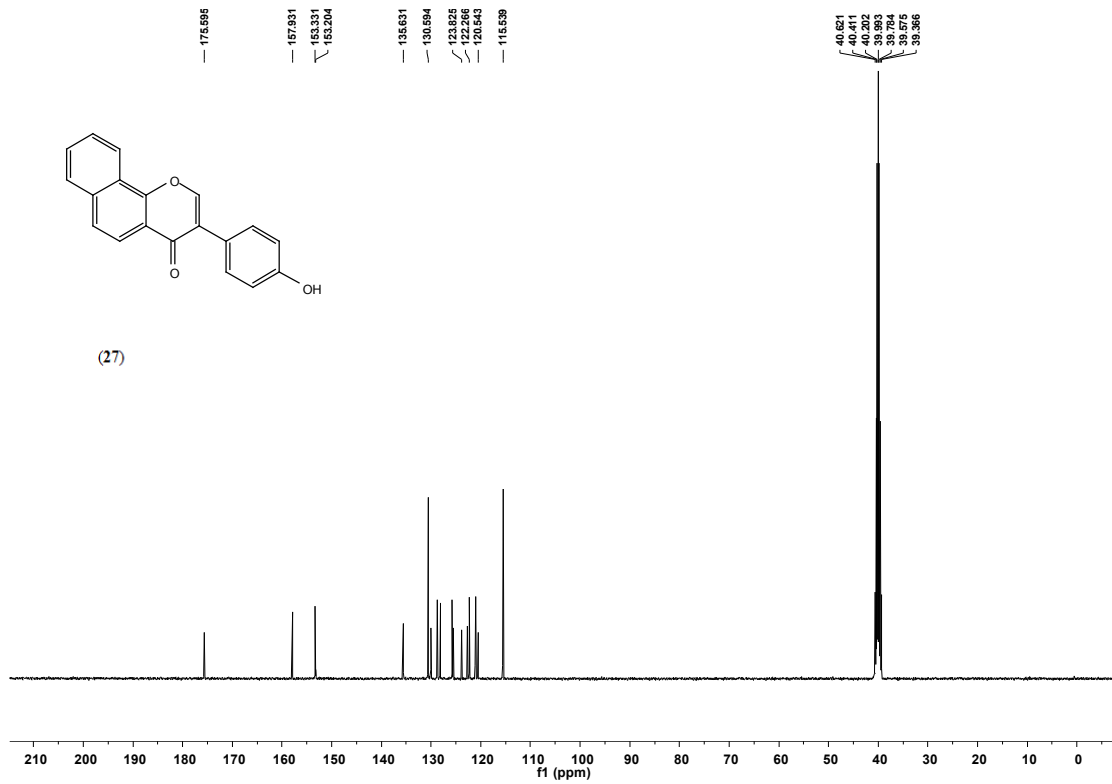

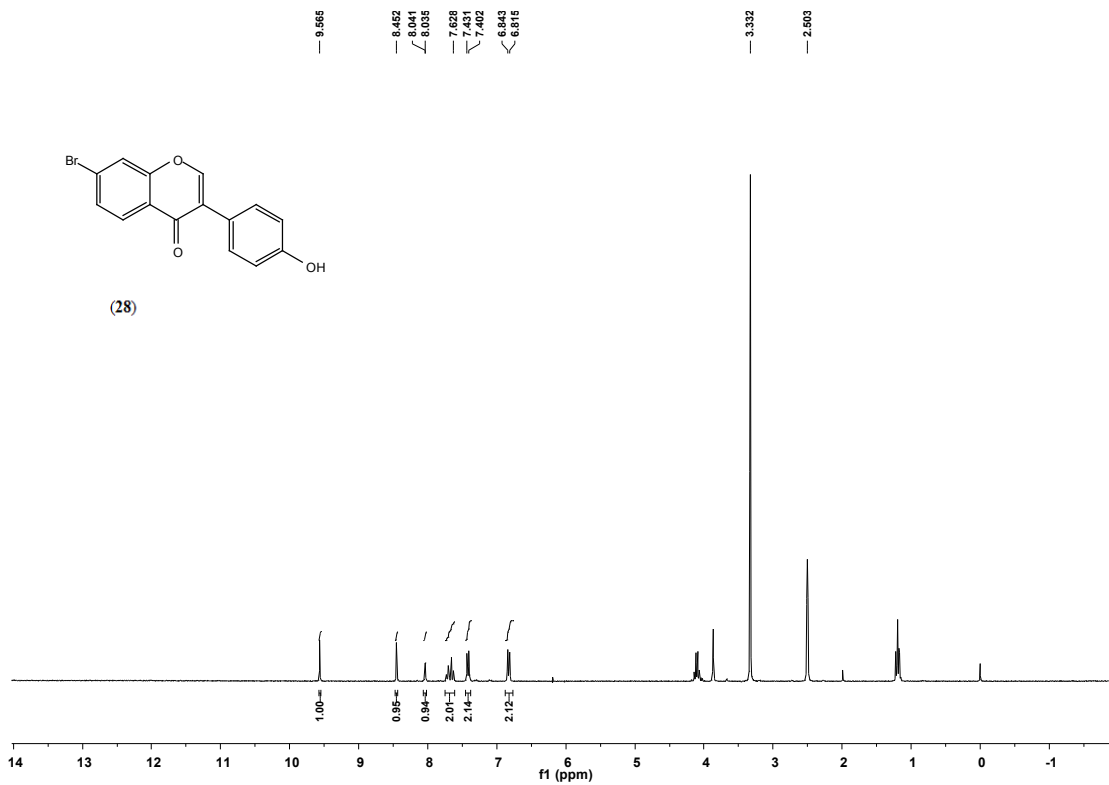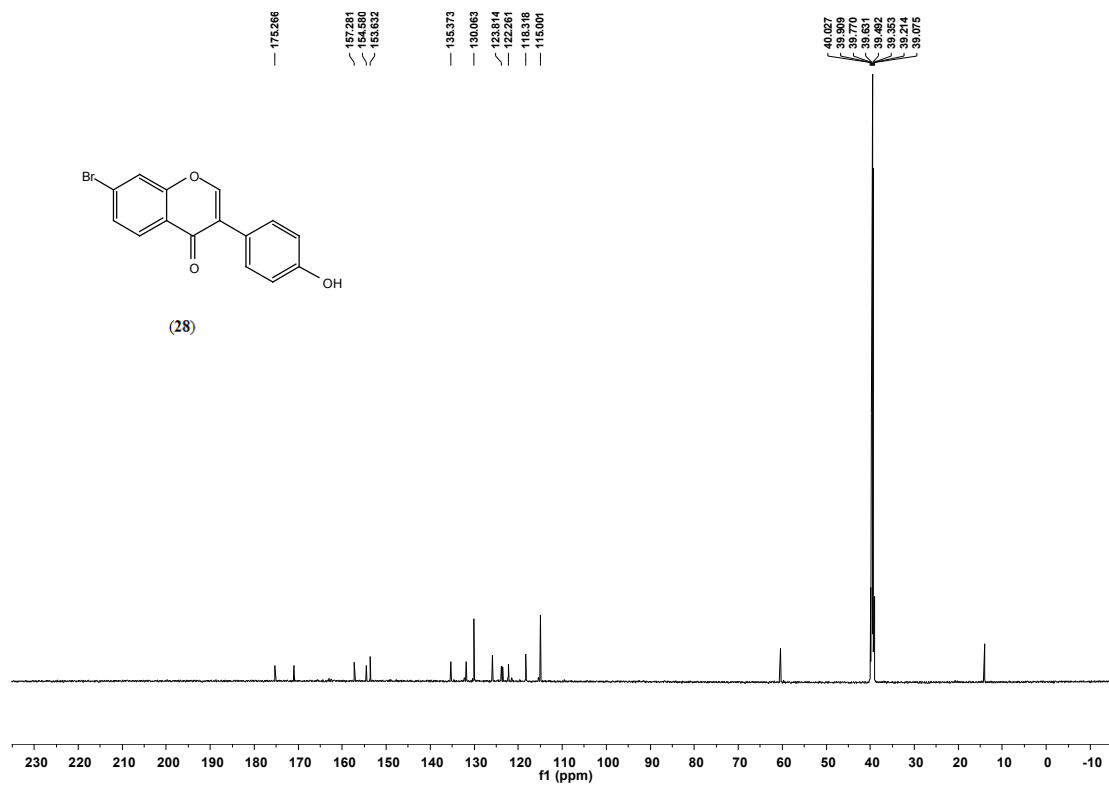

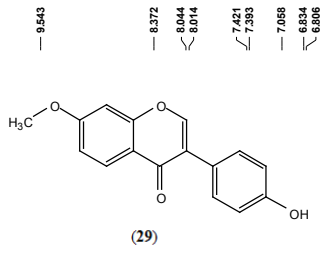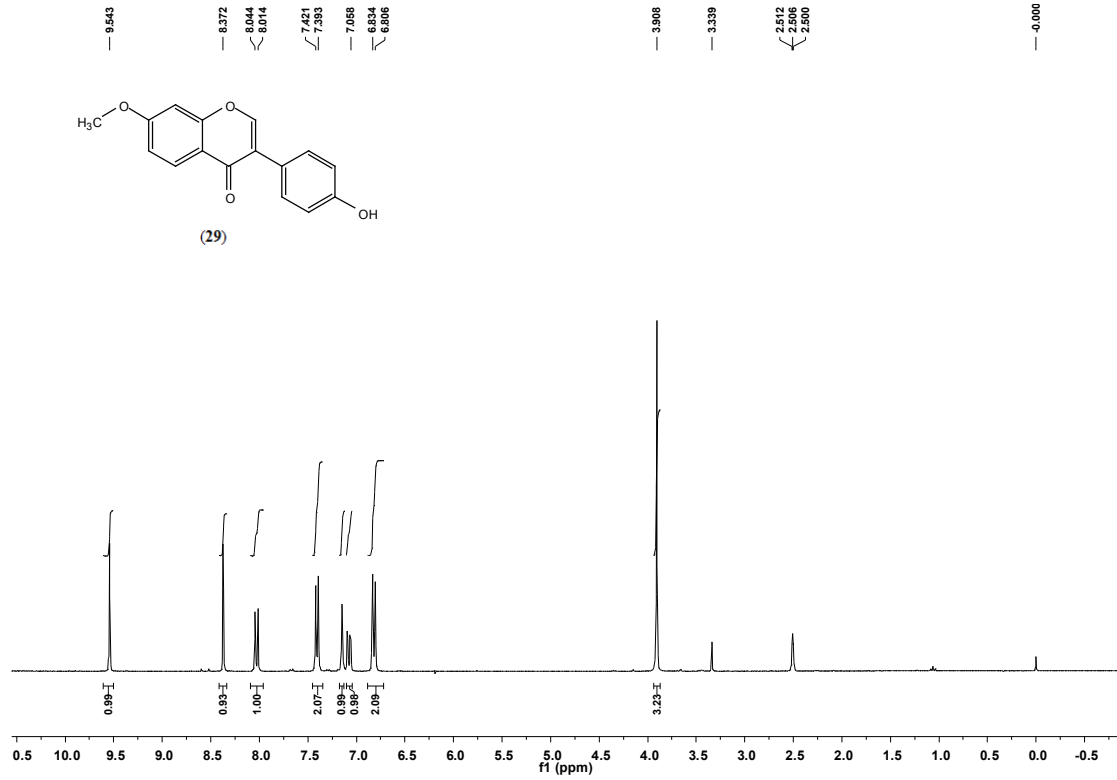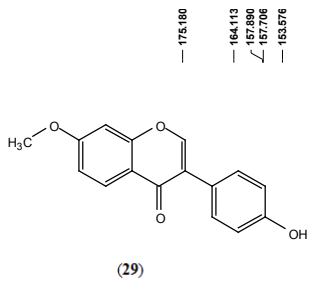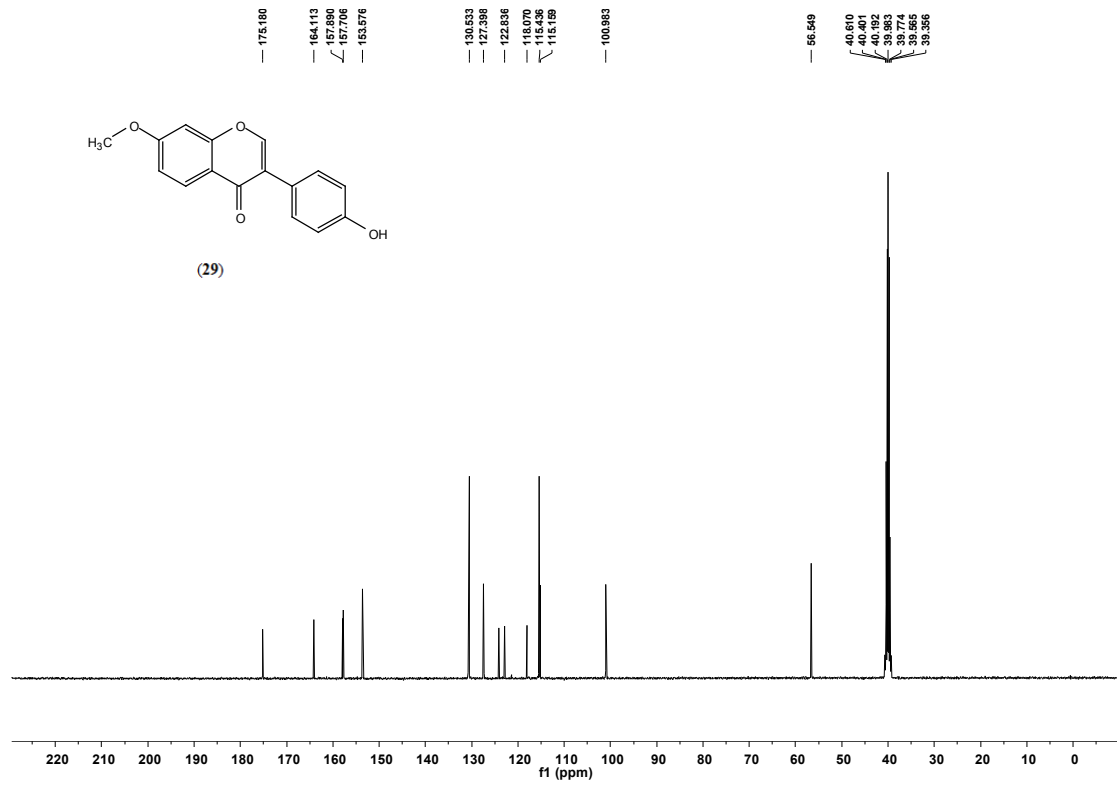

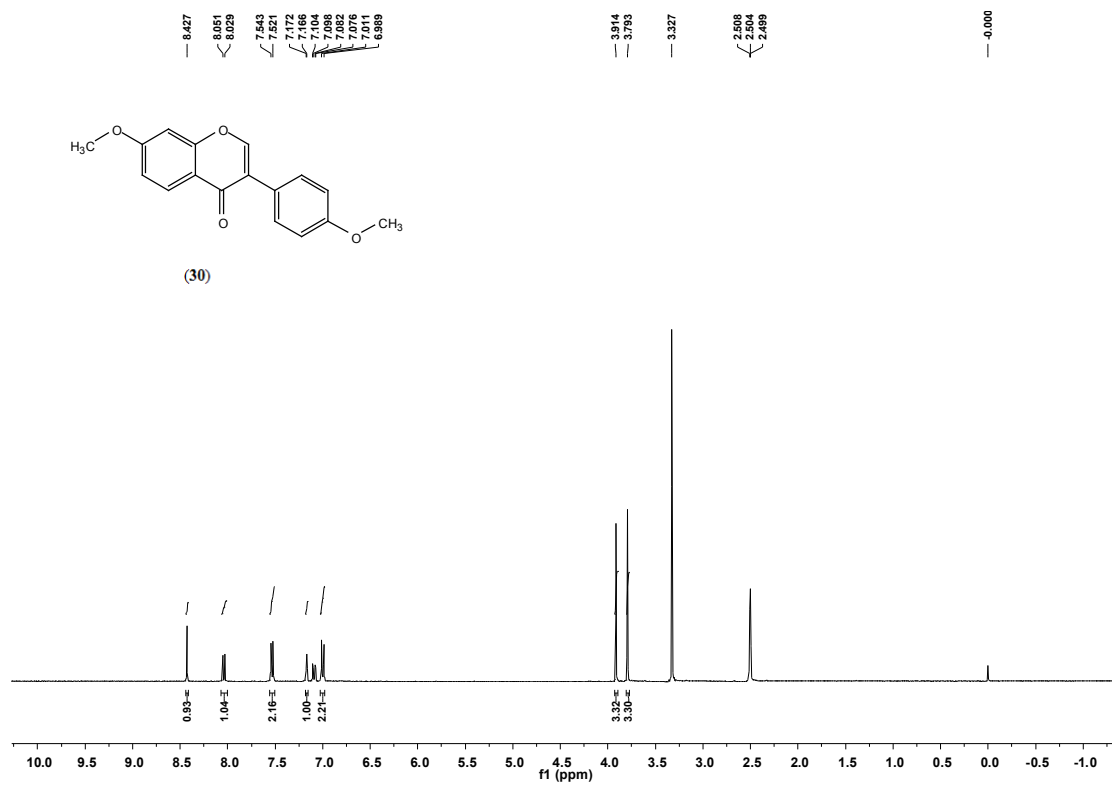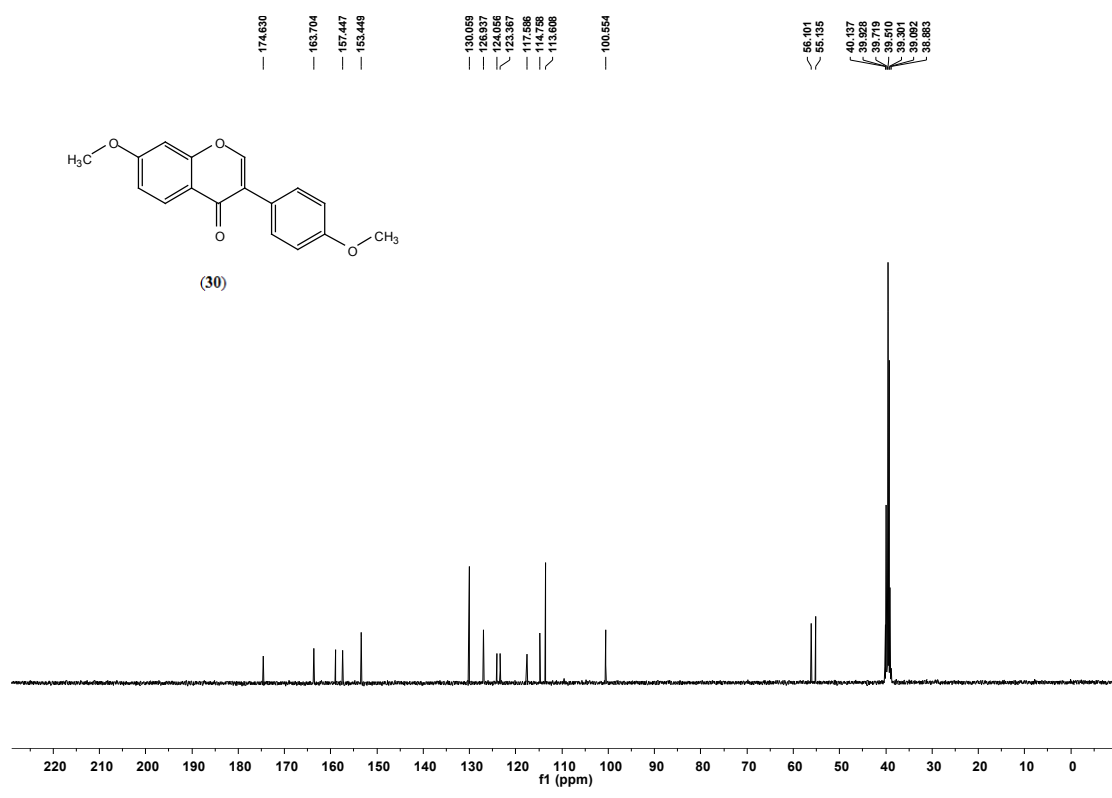

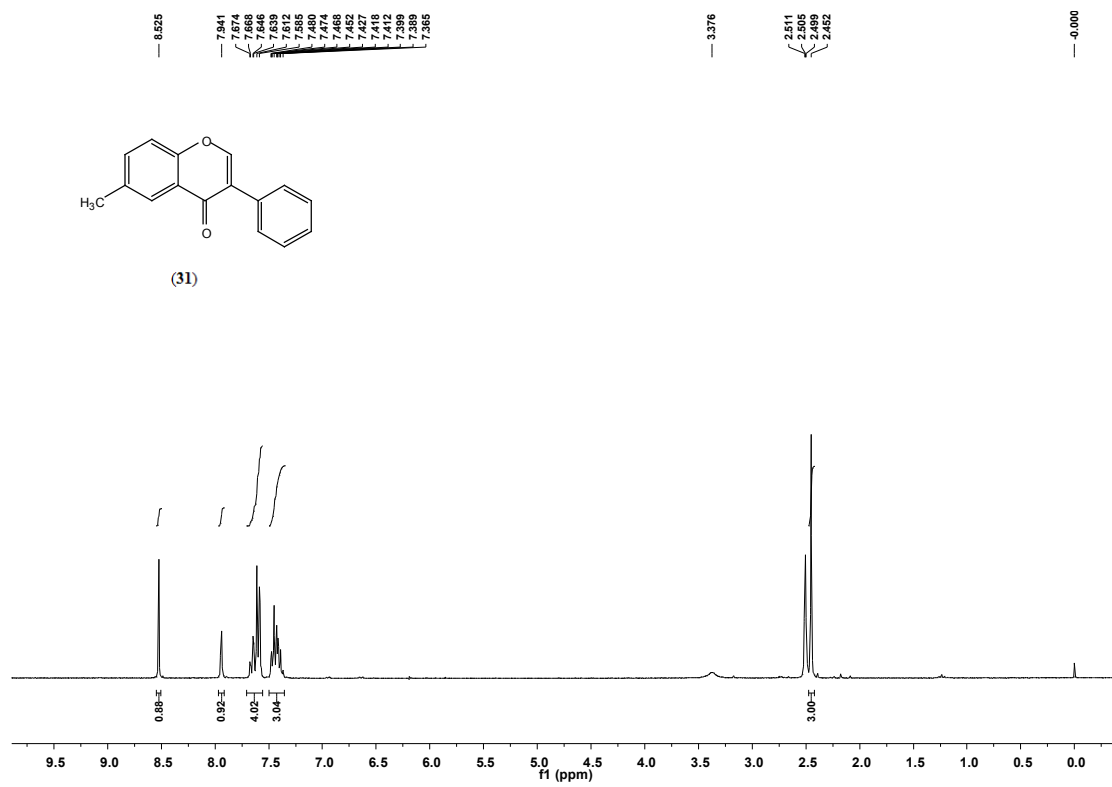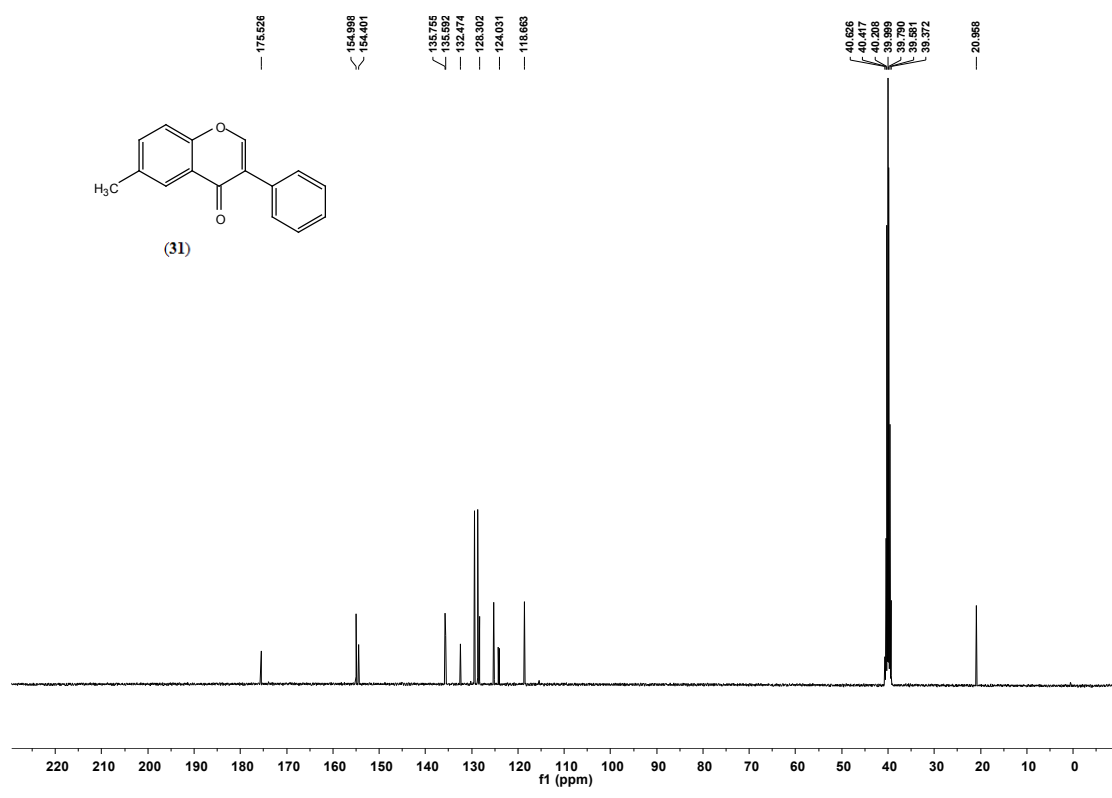

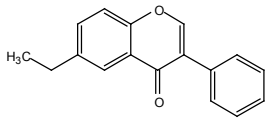

(32)

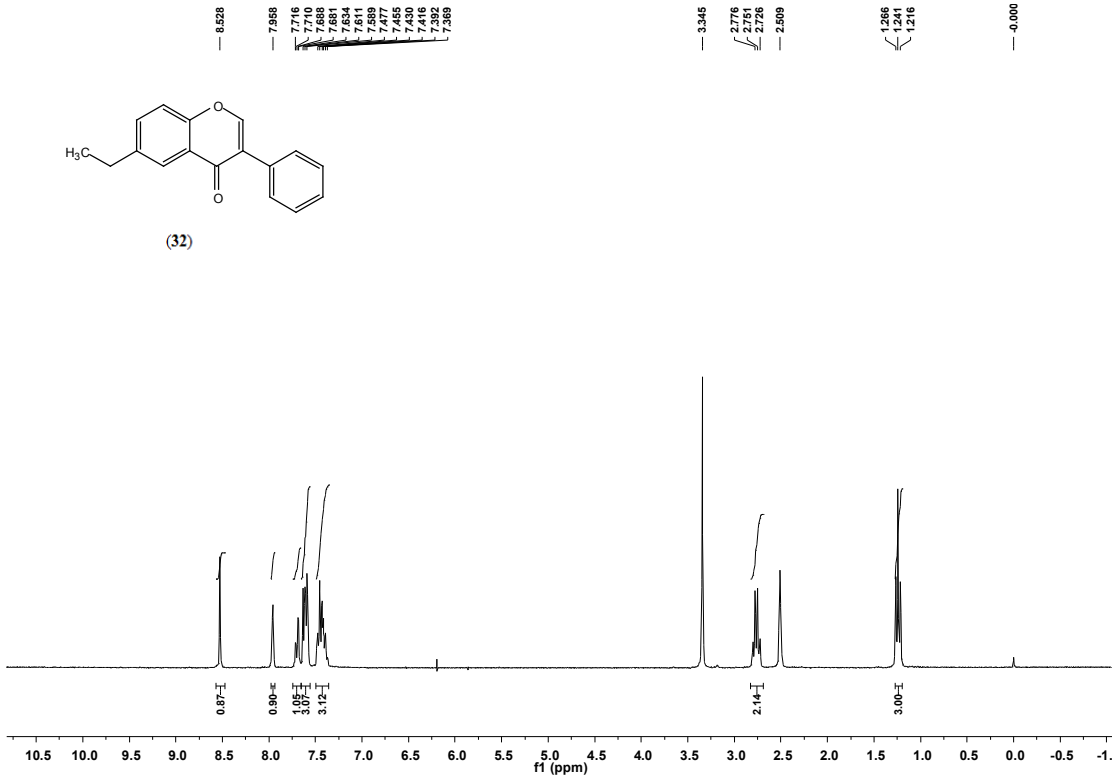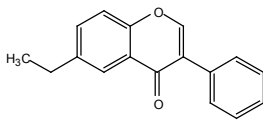

(32)

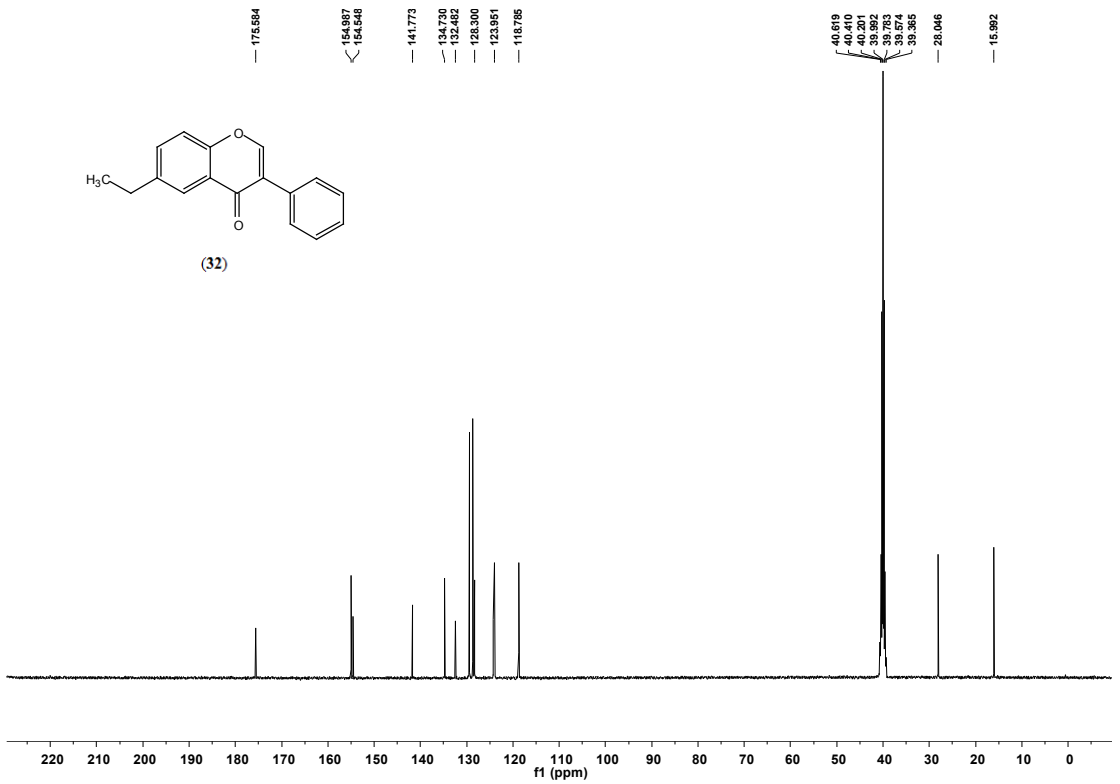

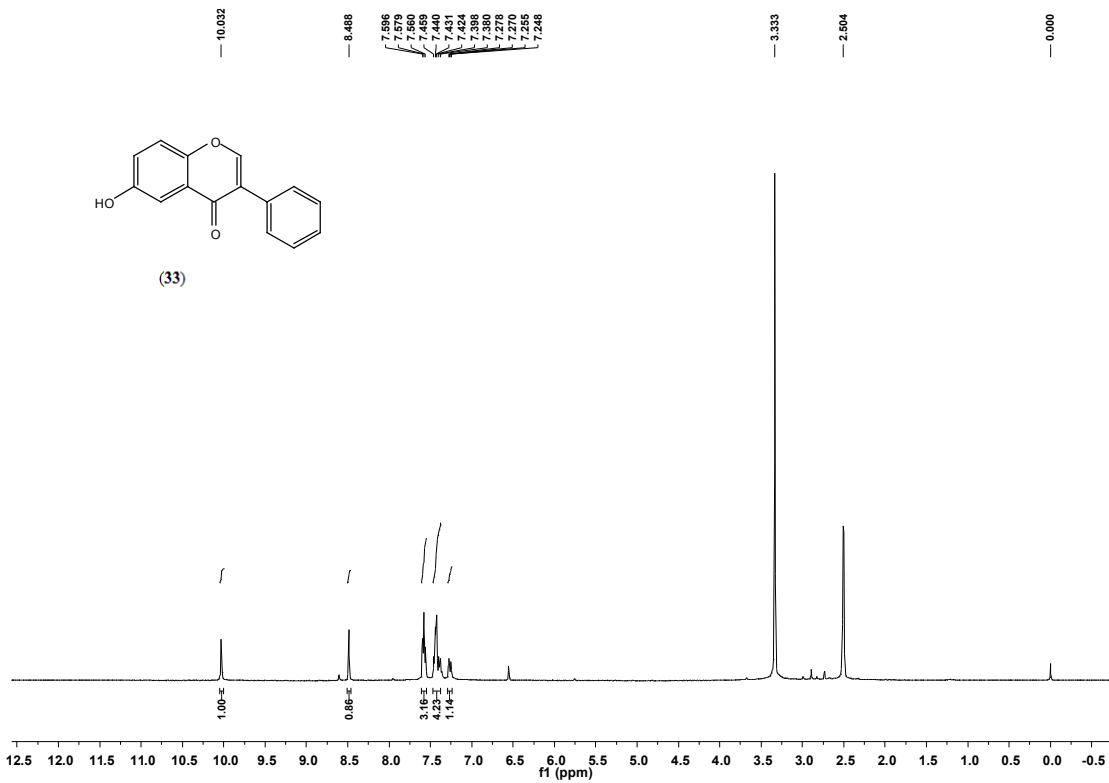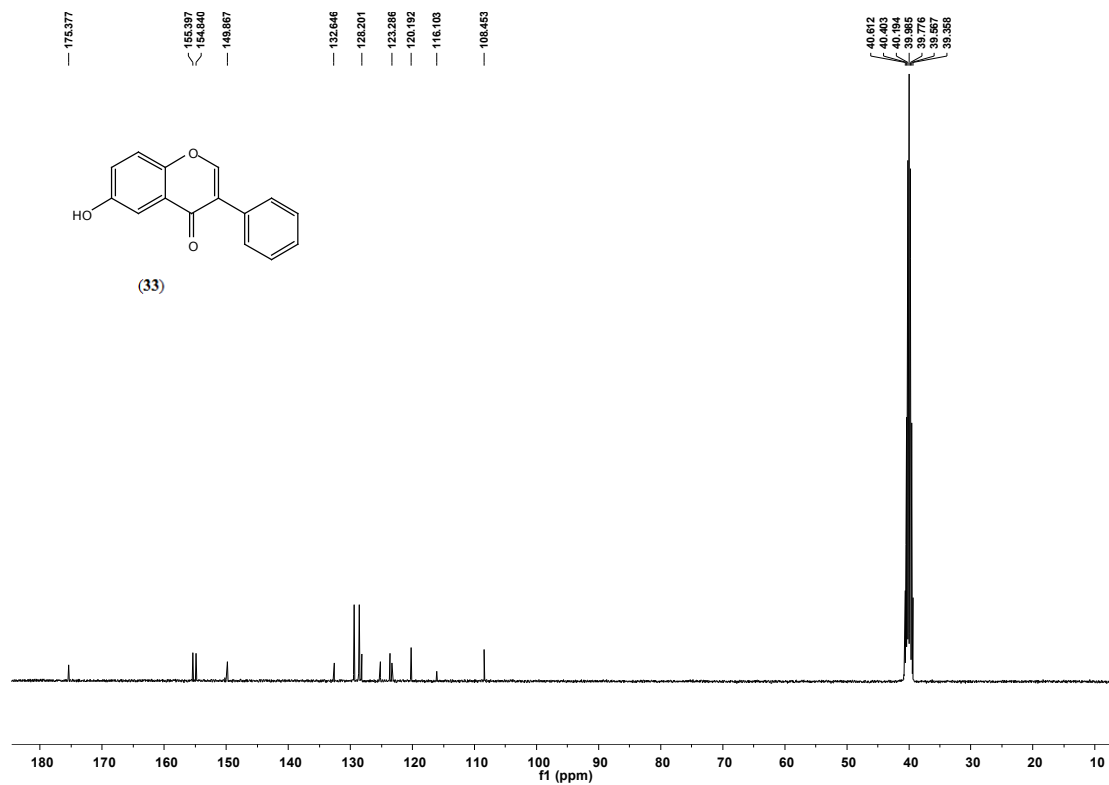



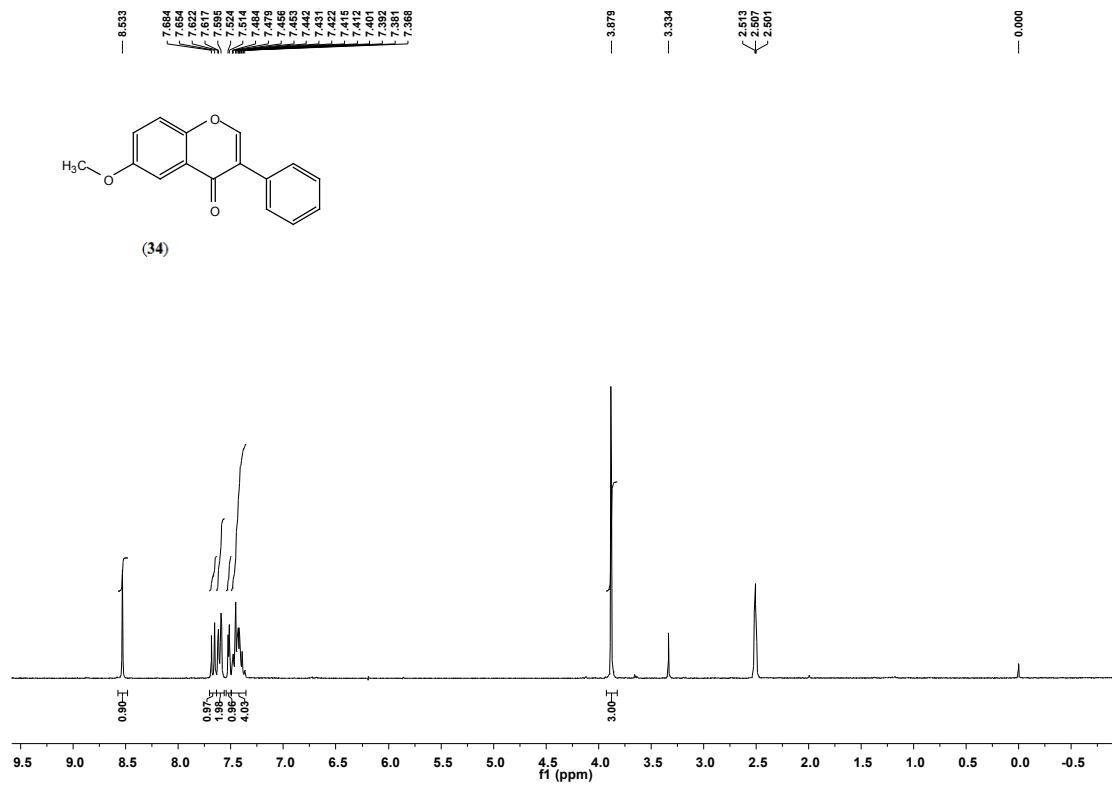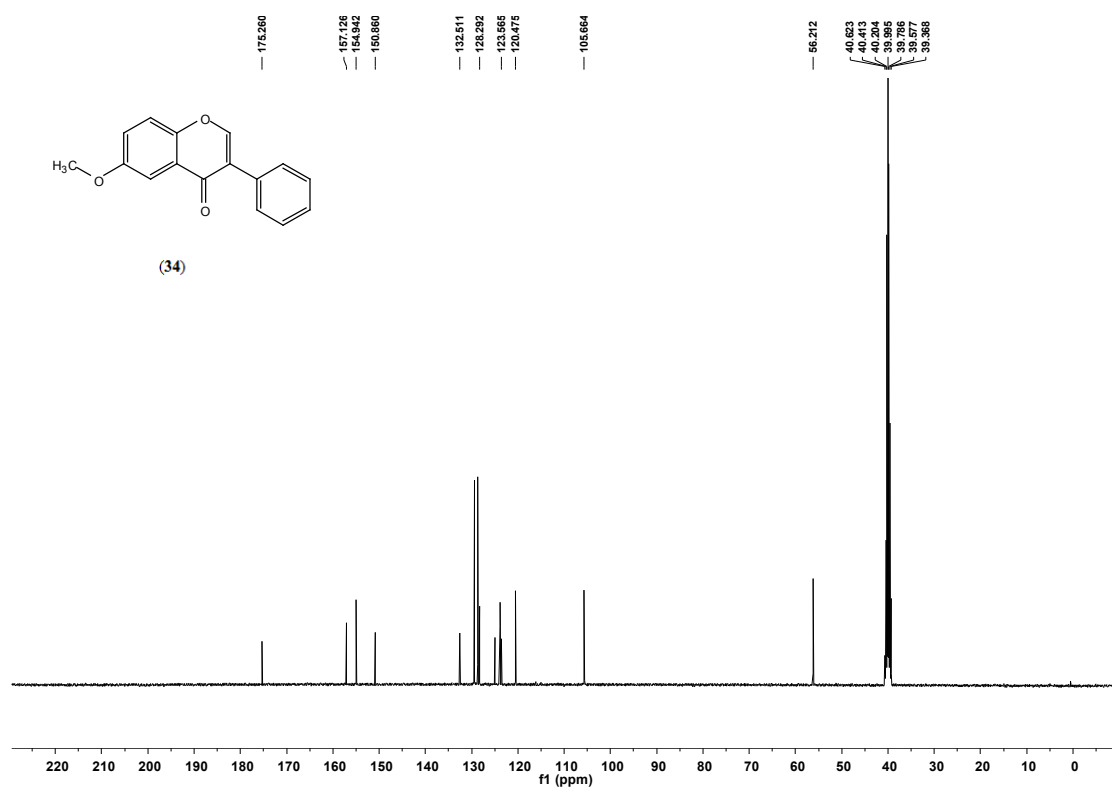

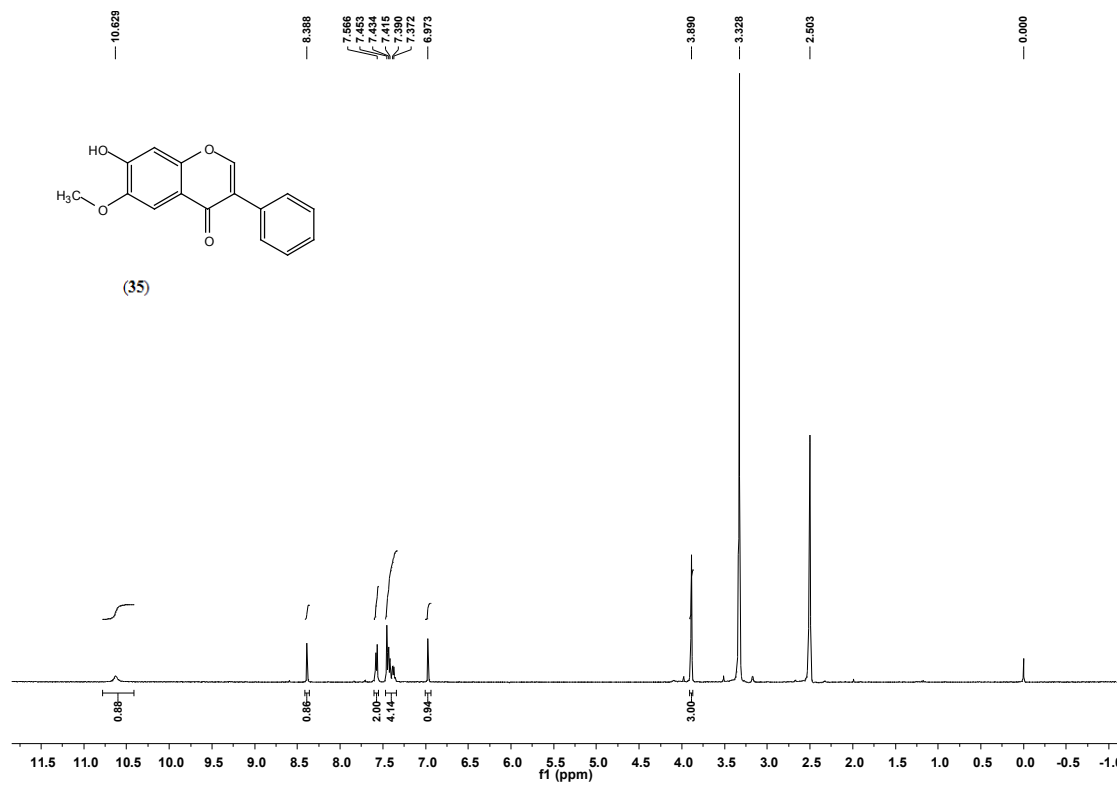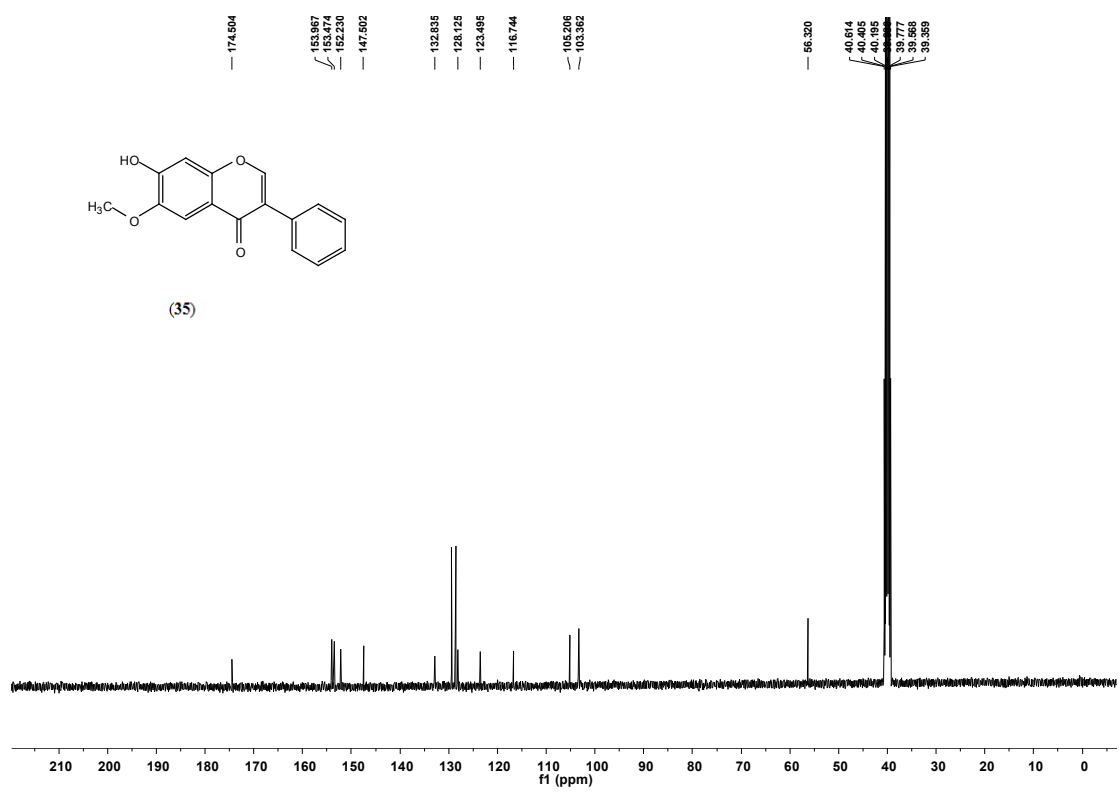

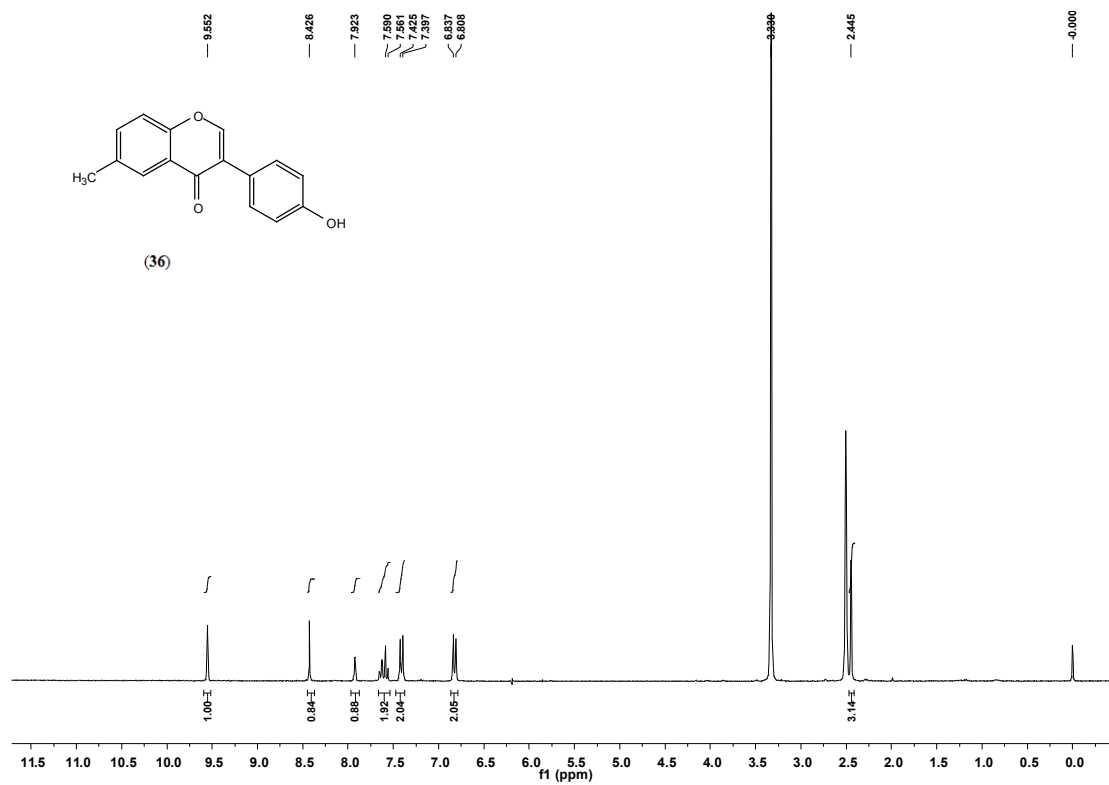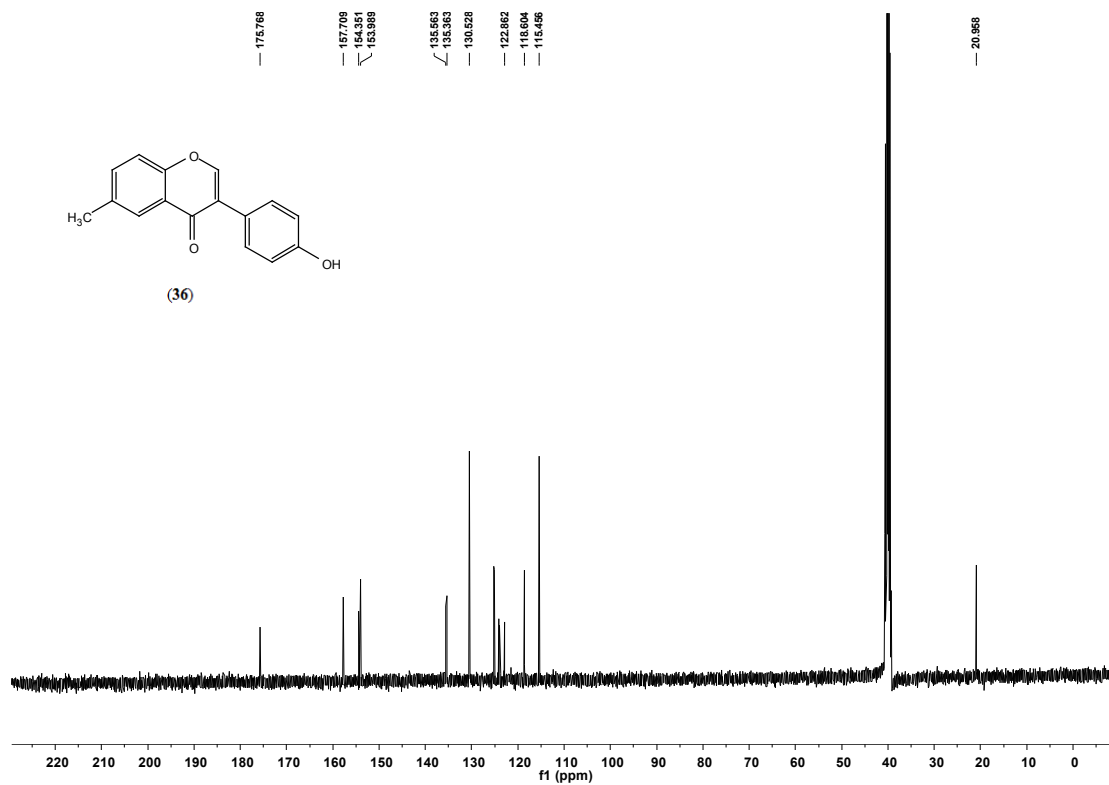

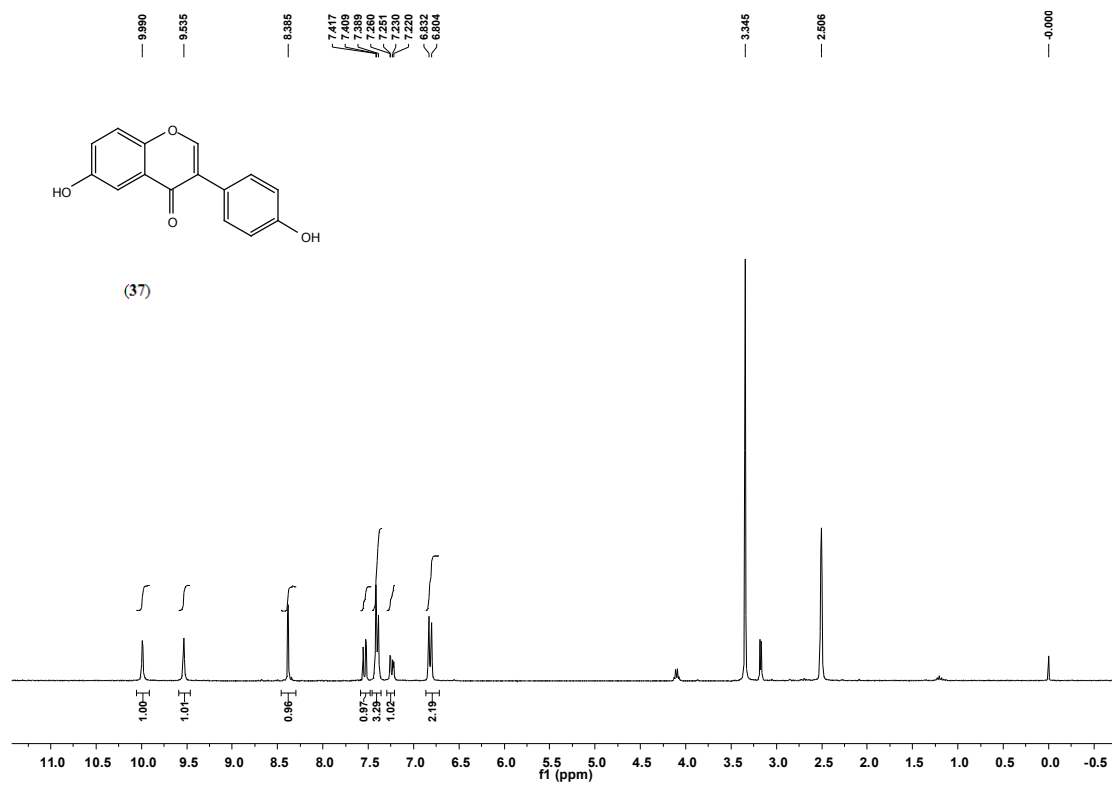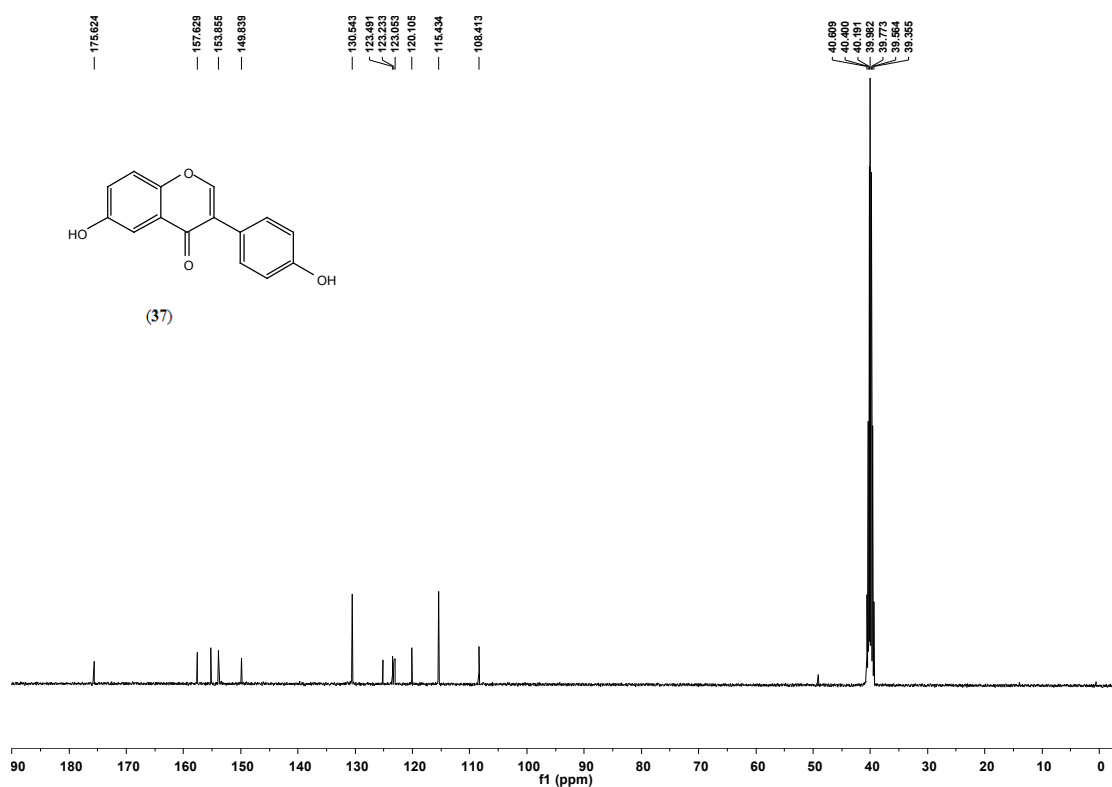

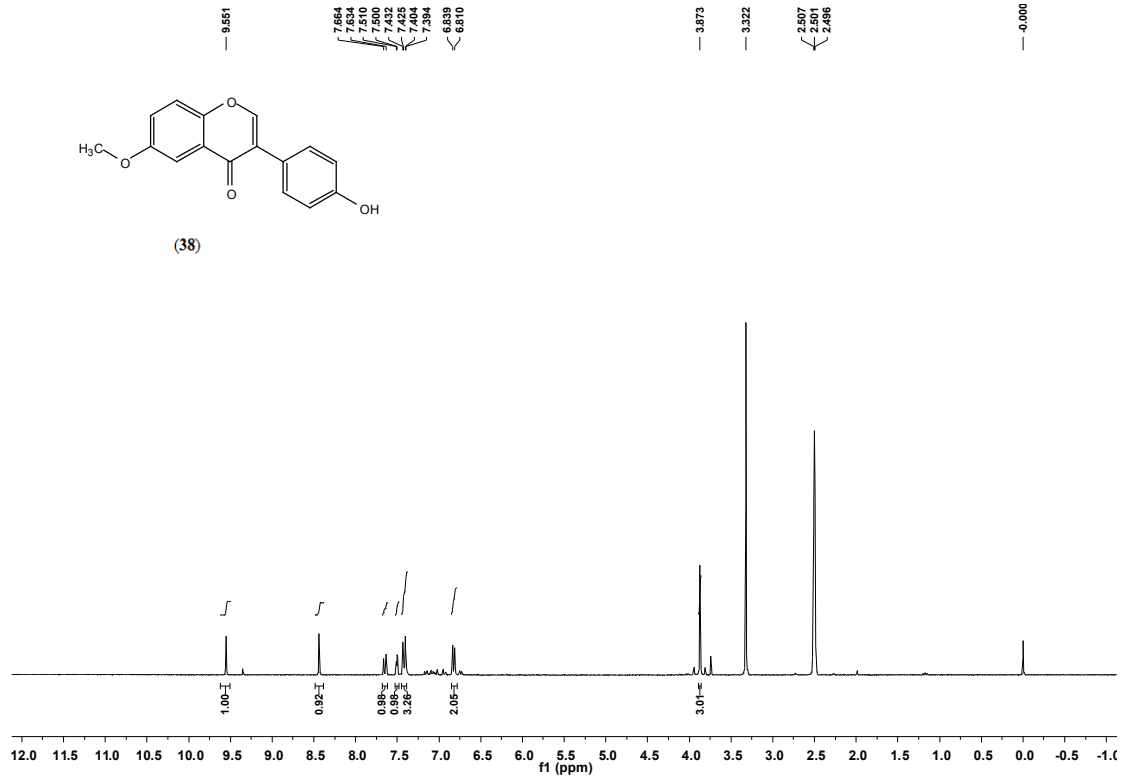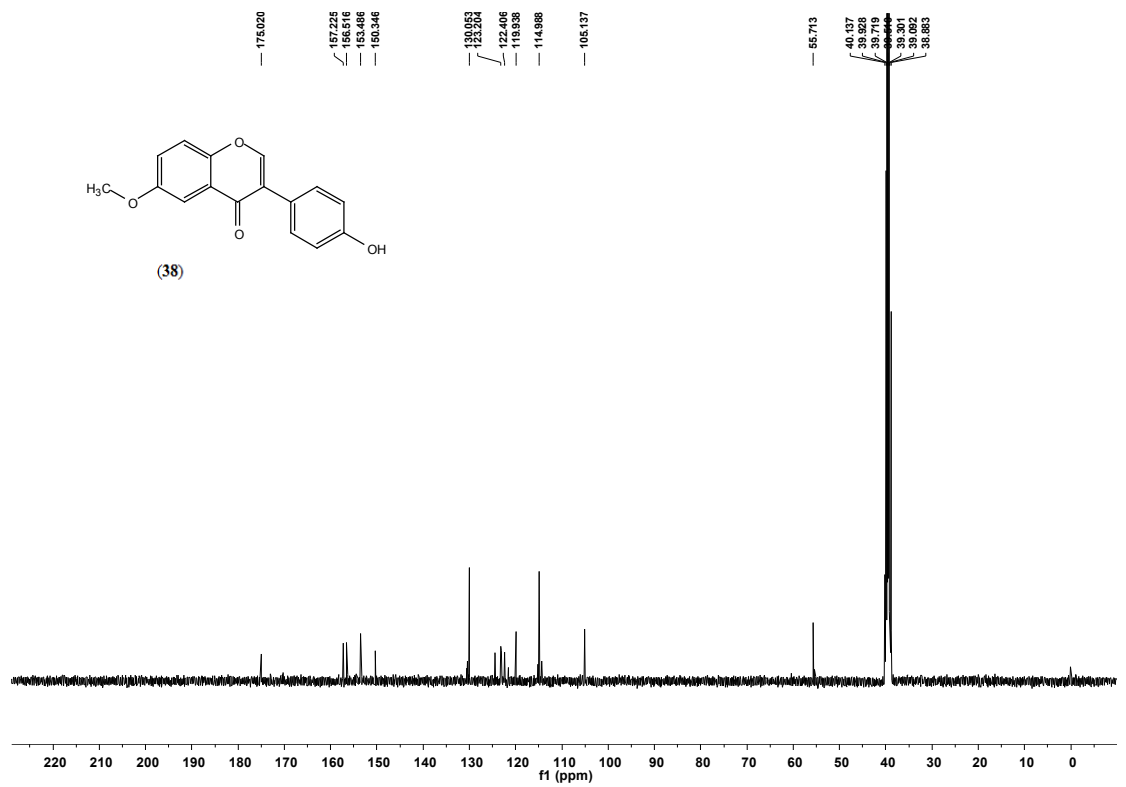

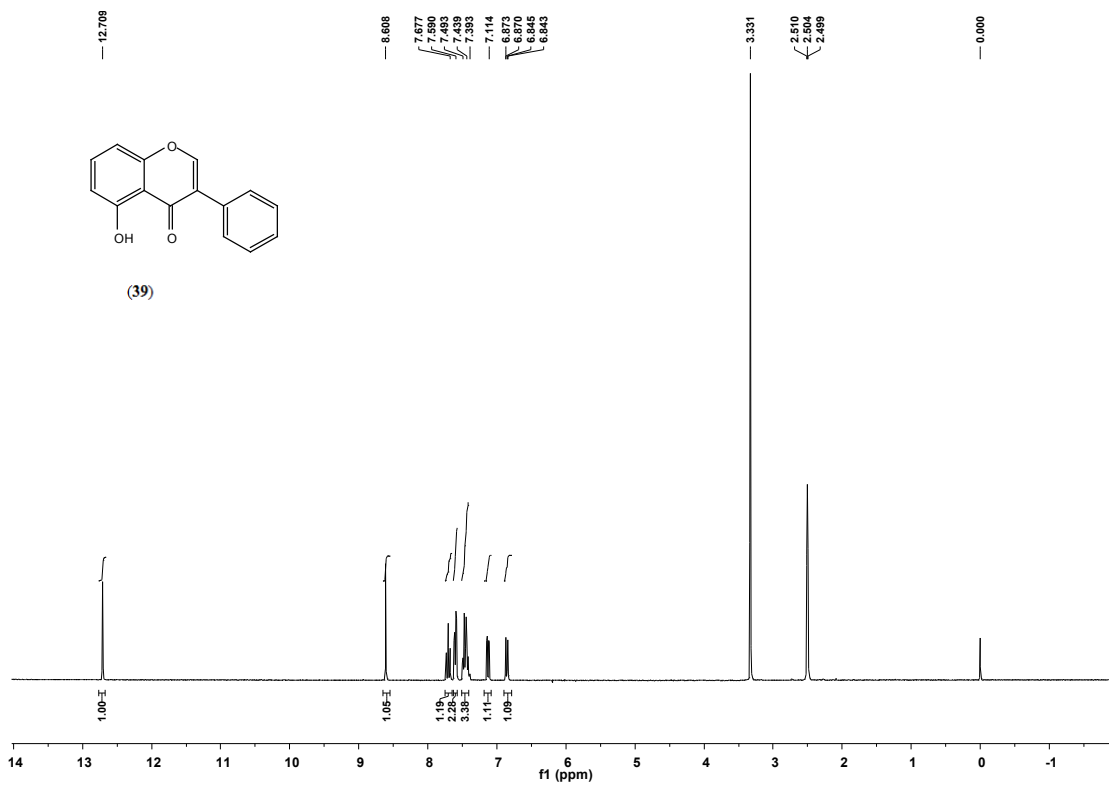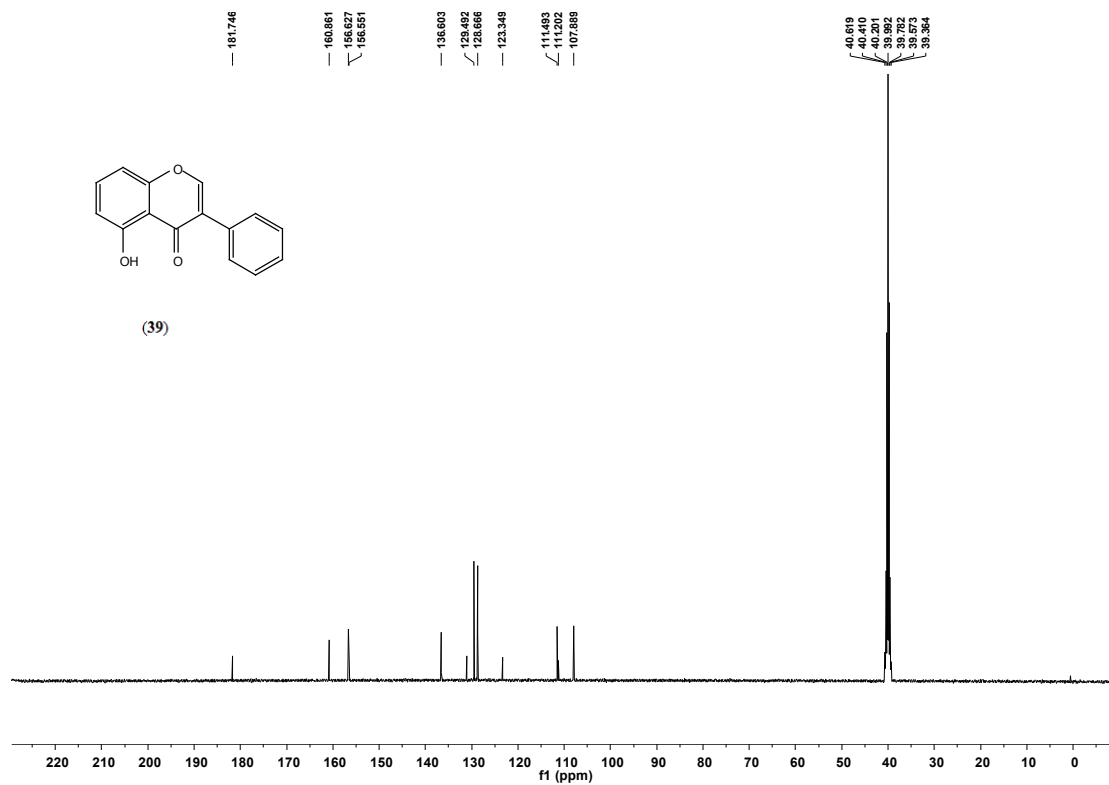

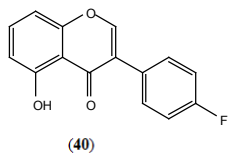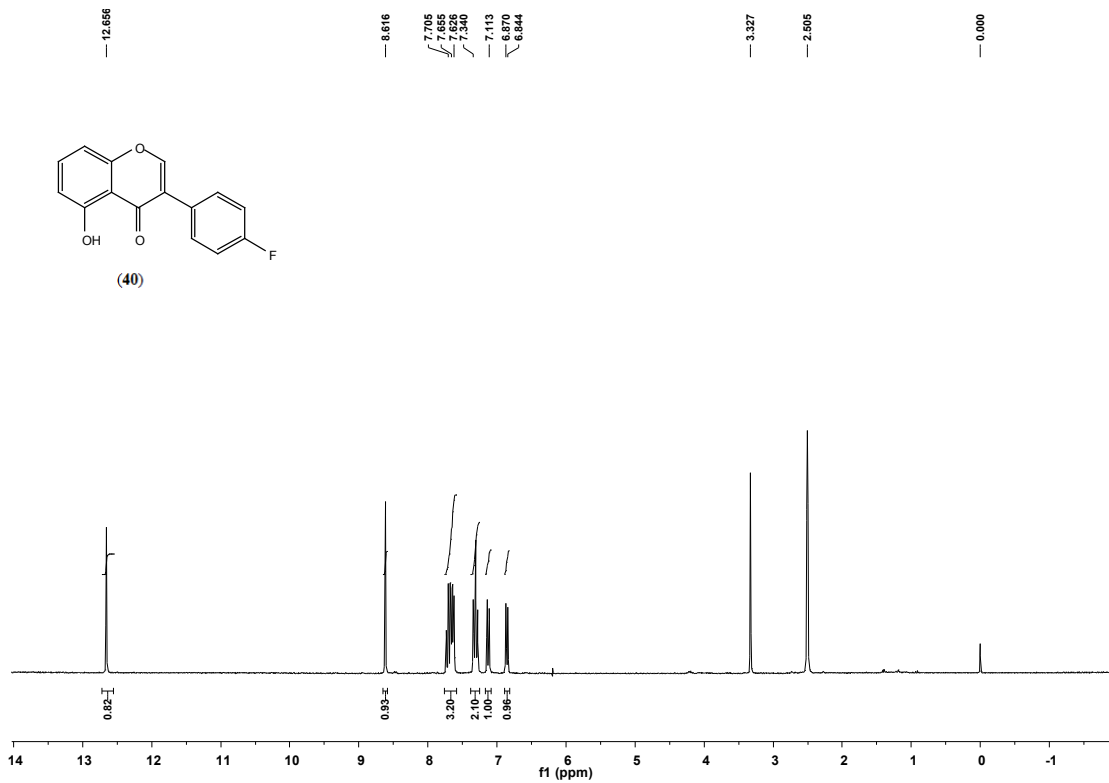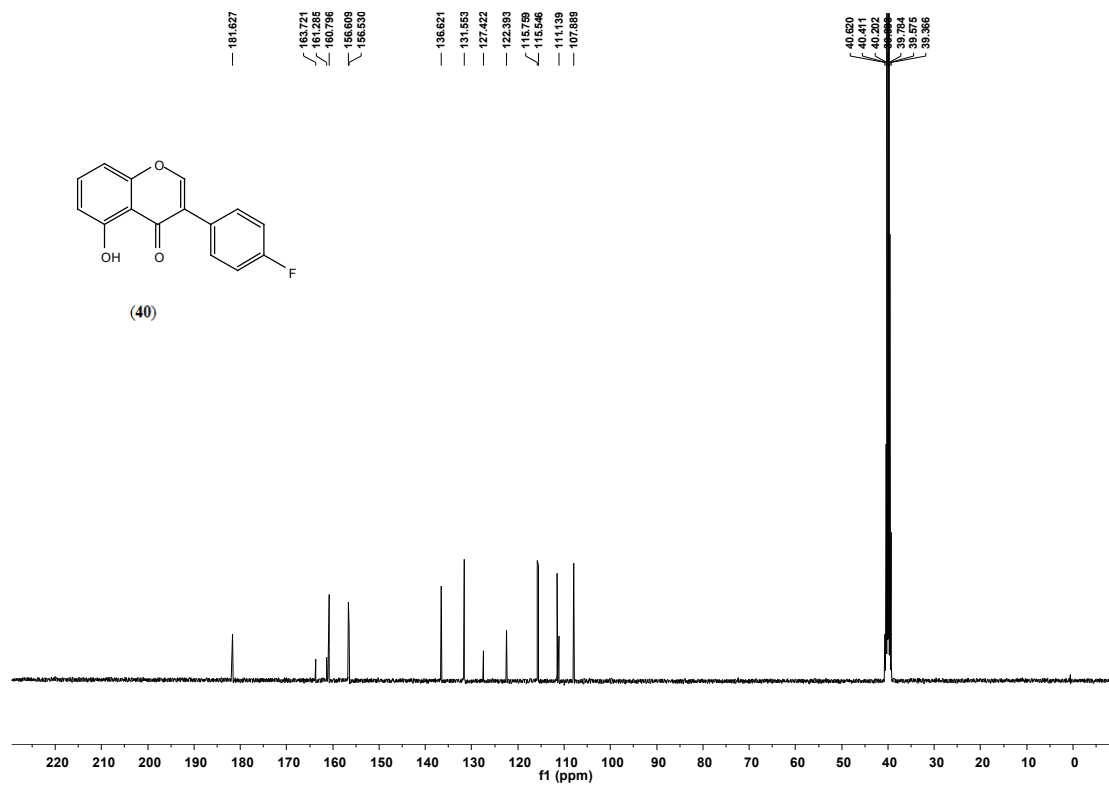

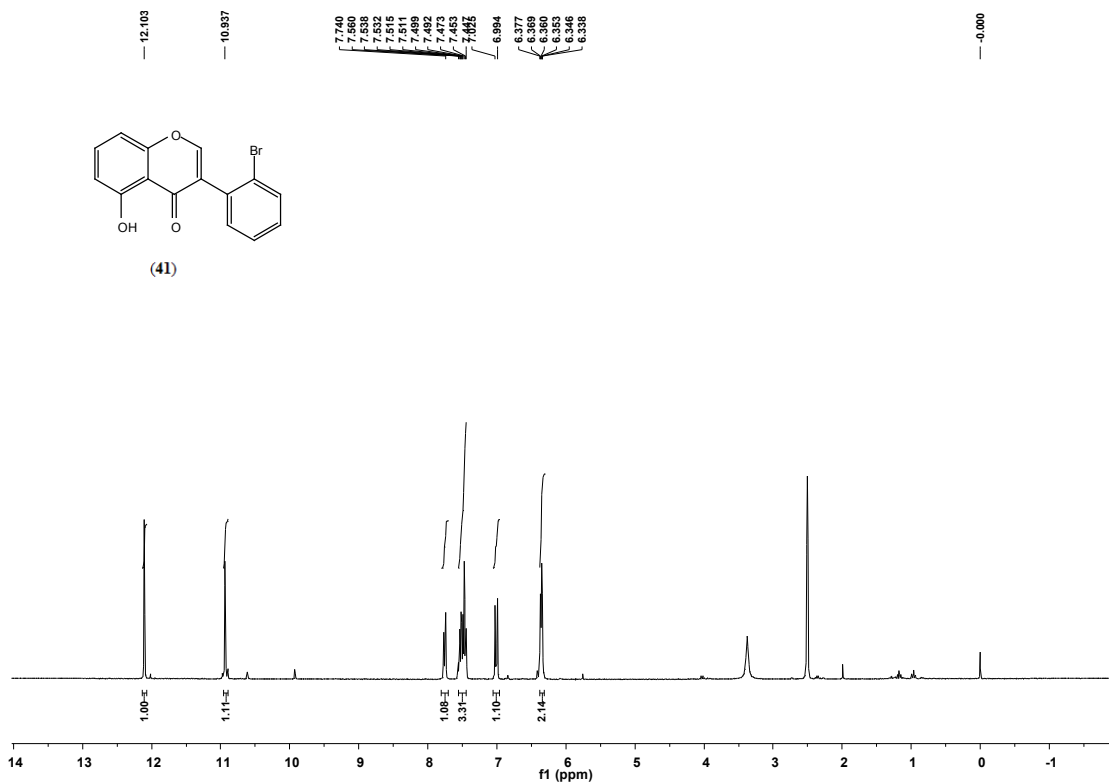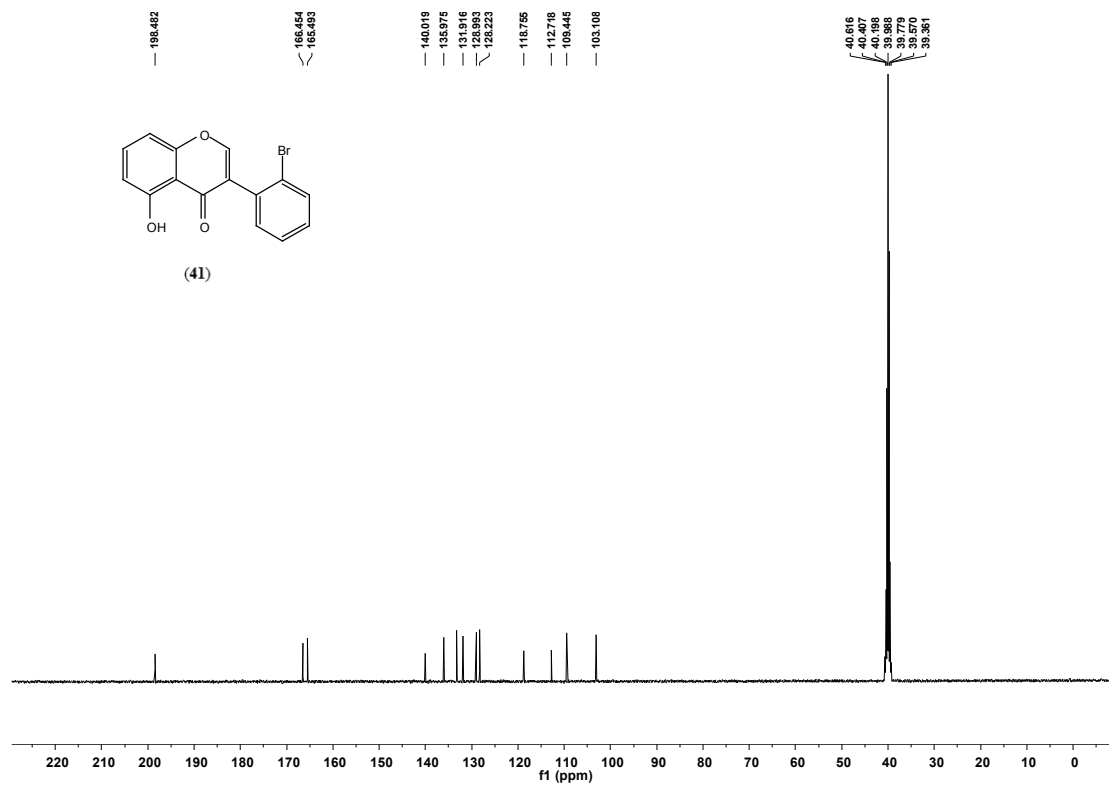



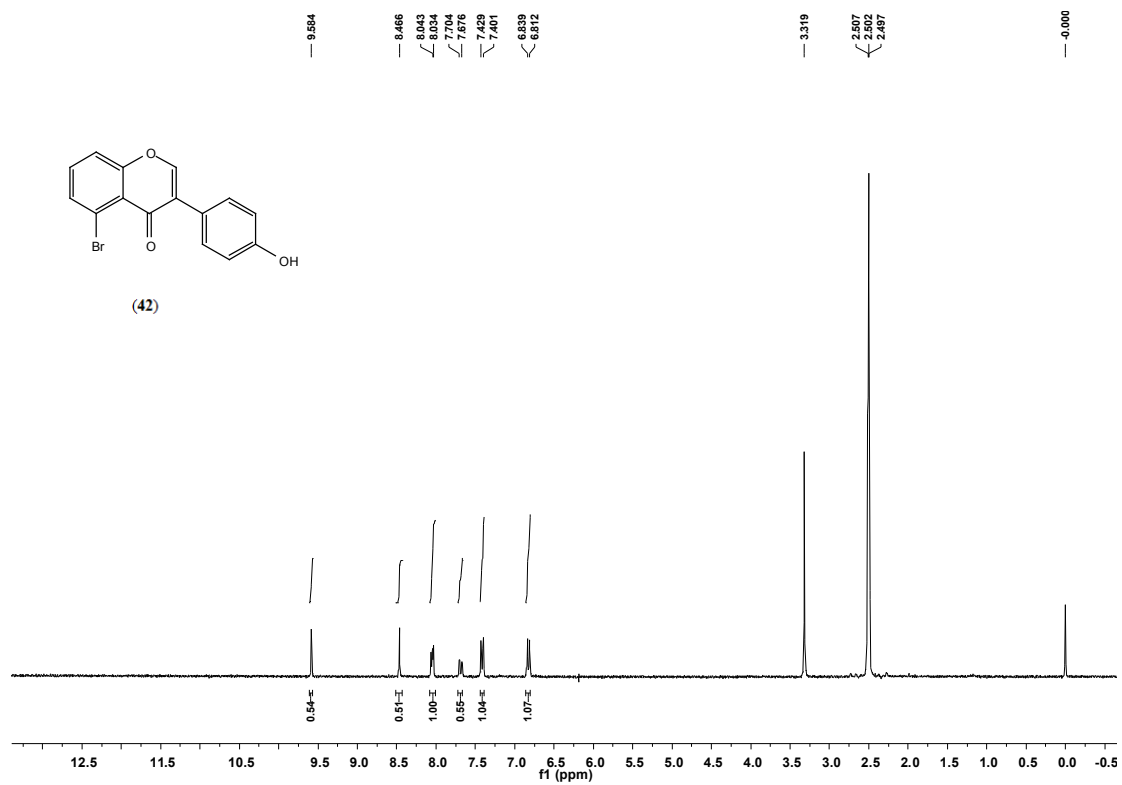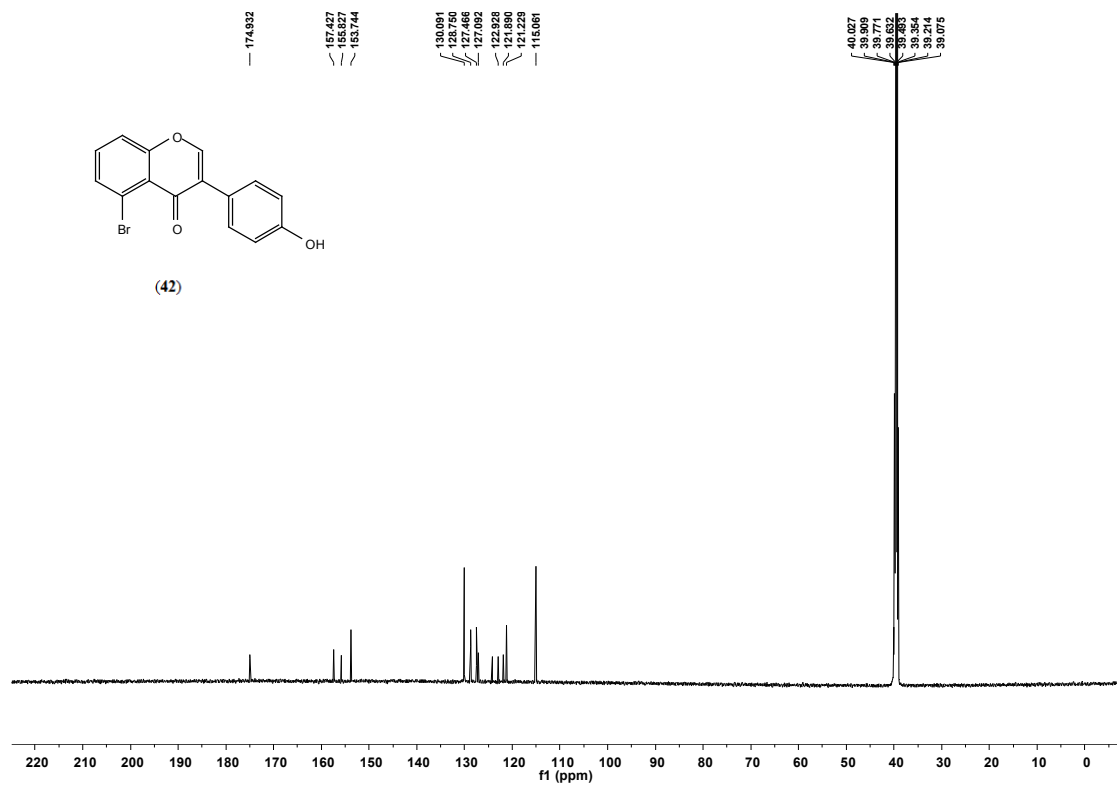

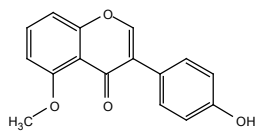

(43)

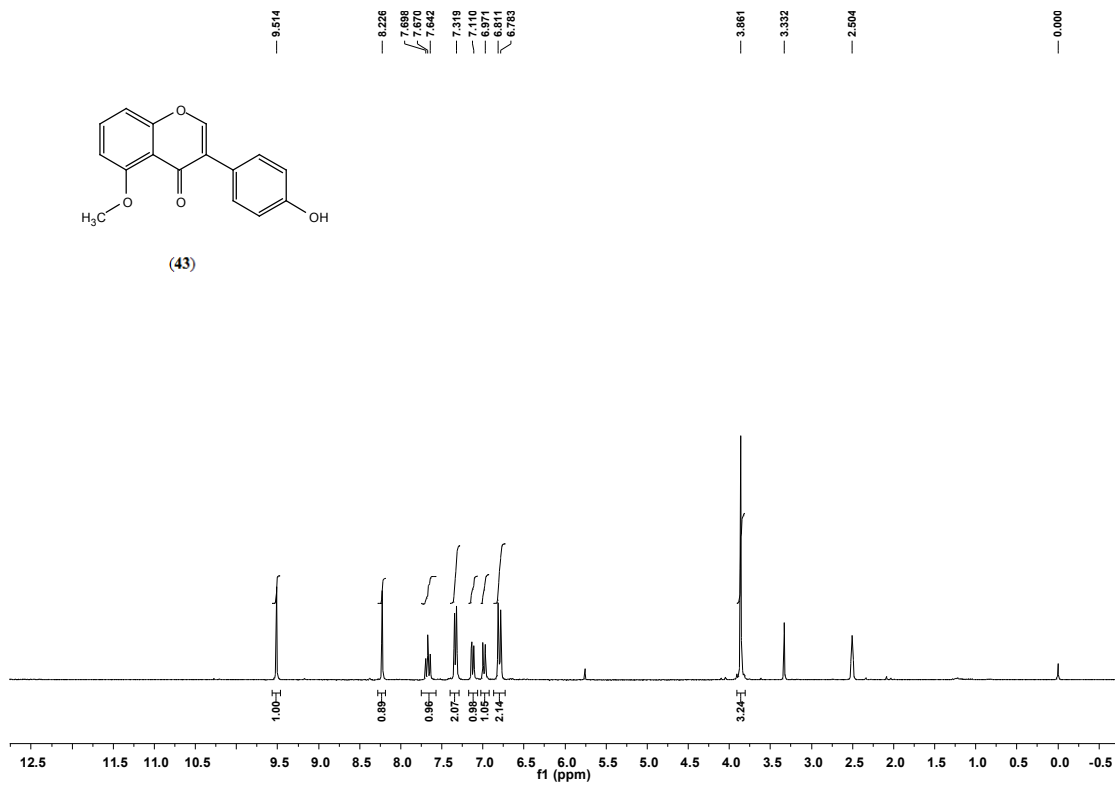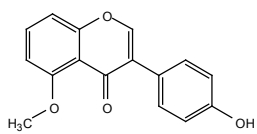

(43)

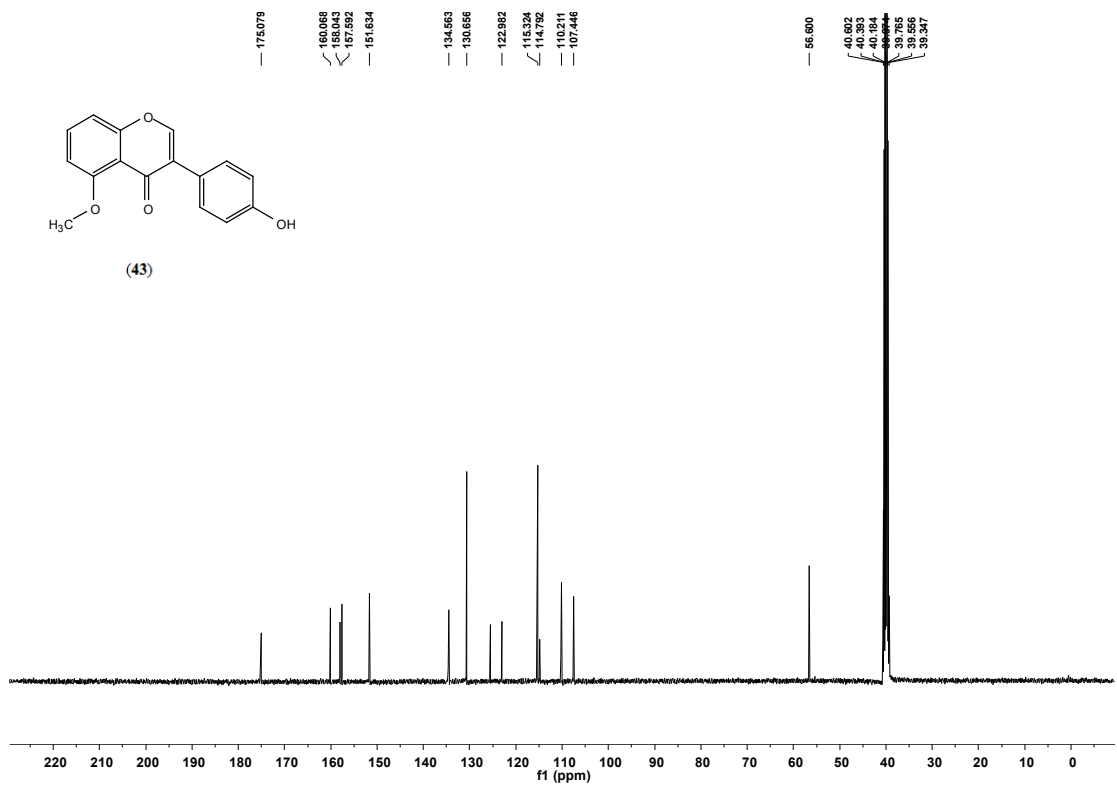

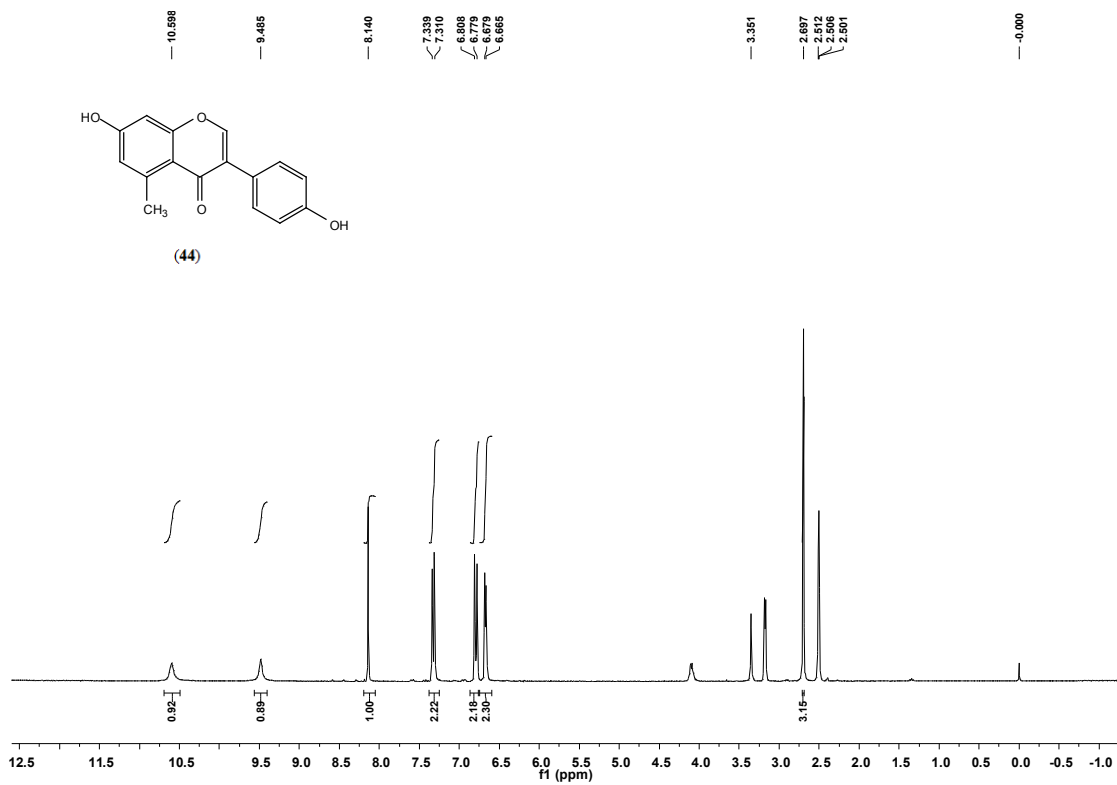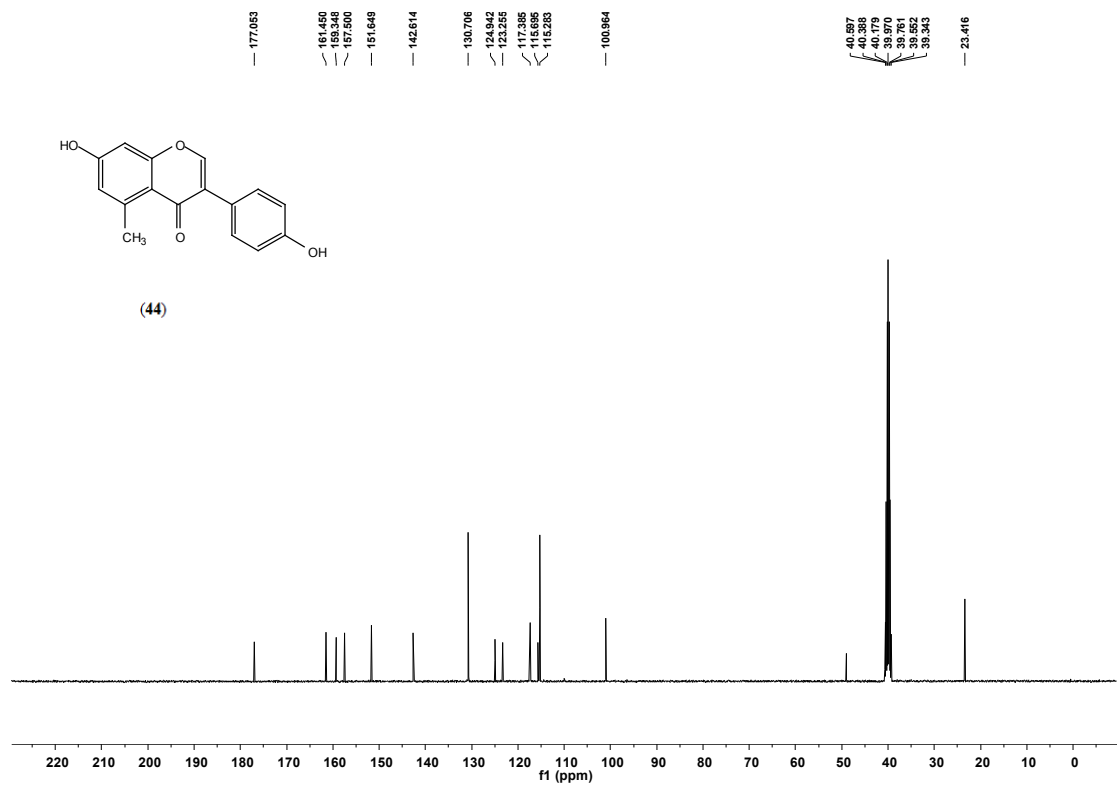

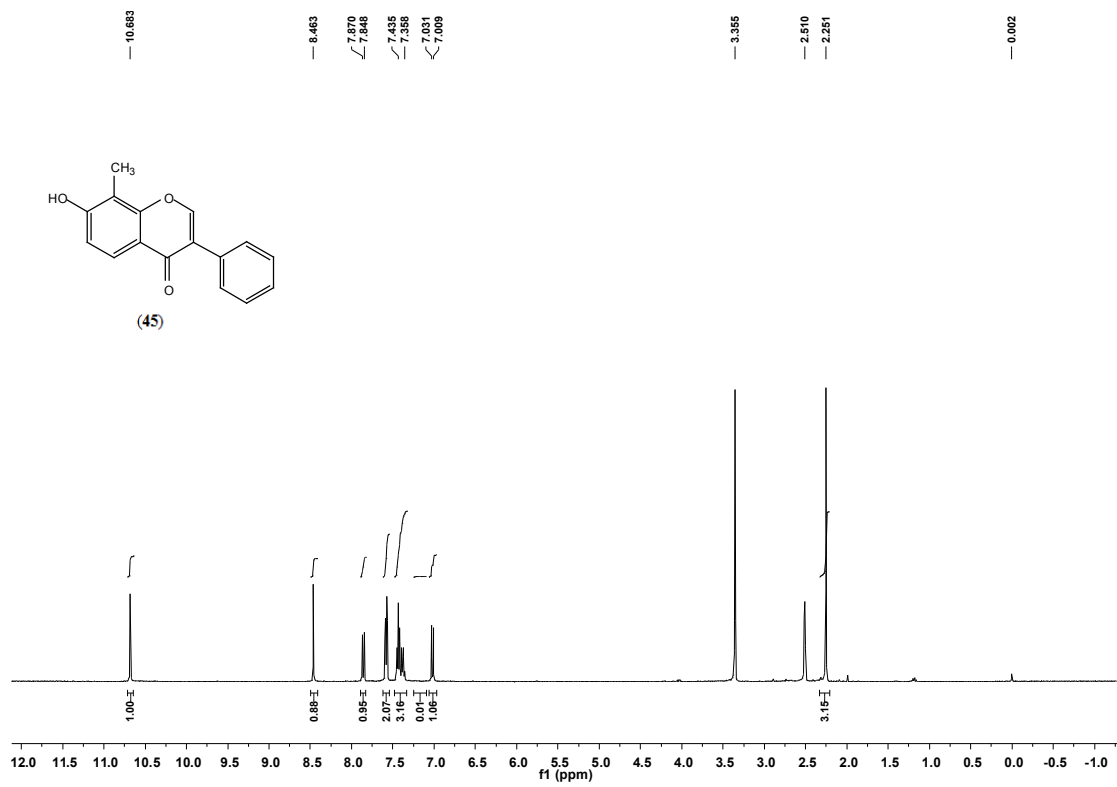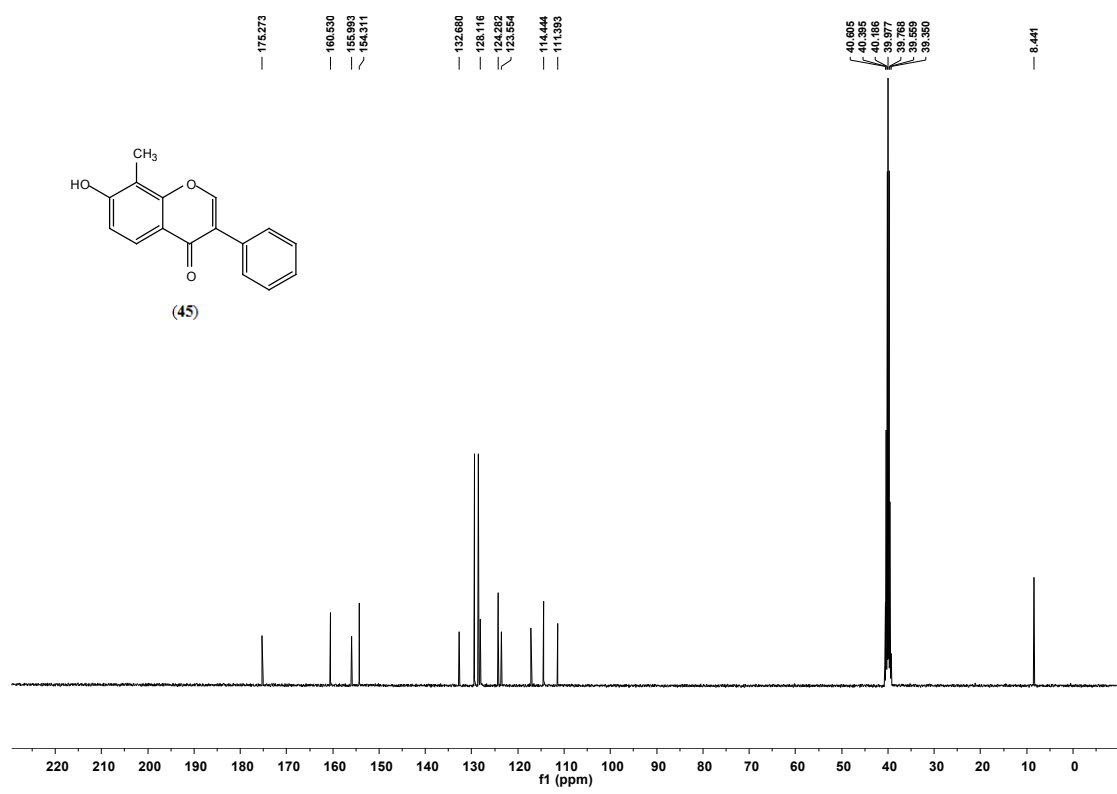

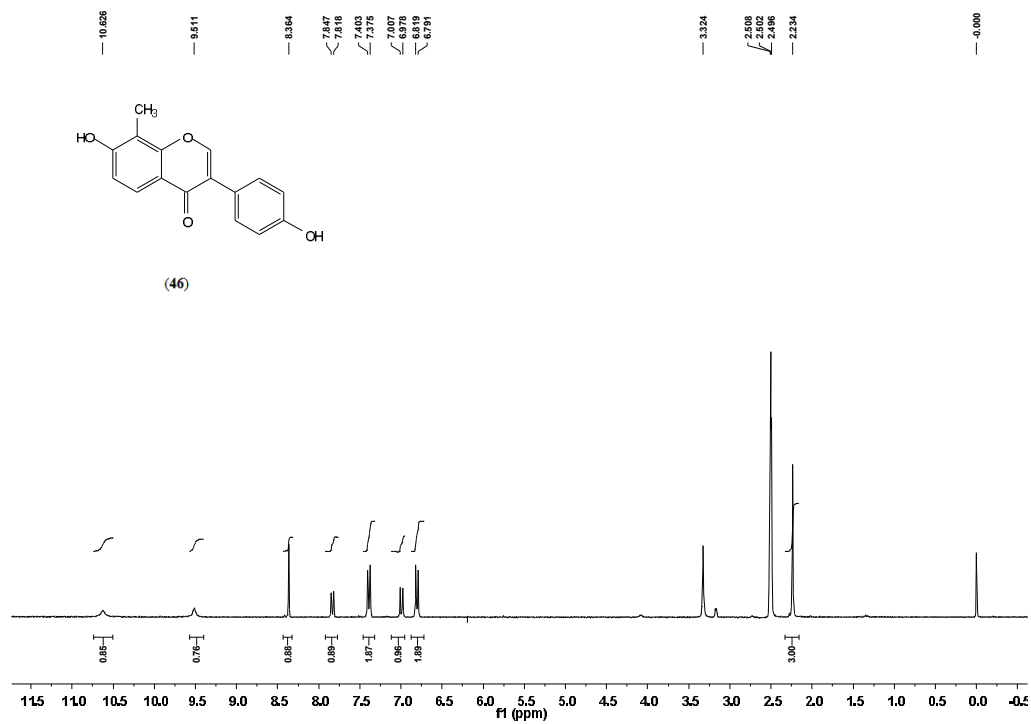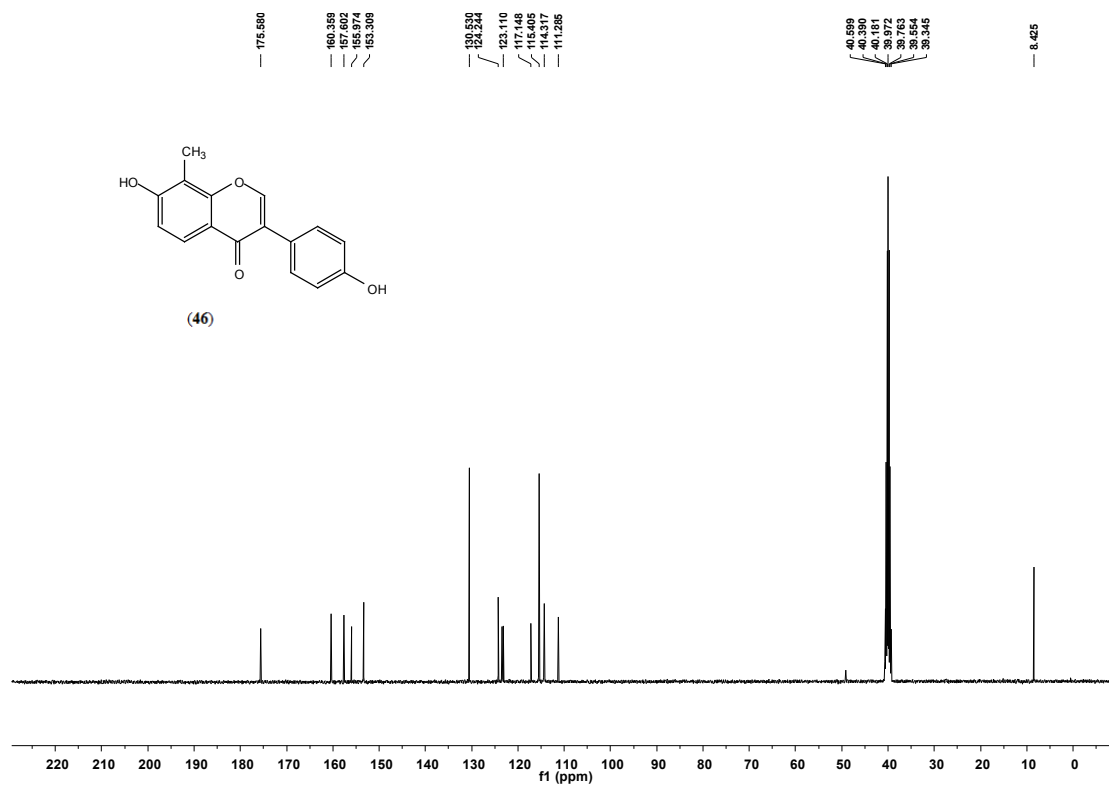

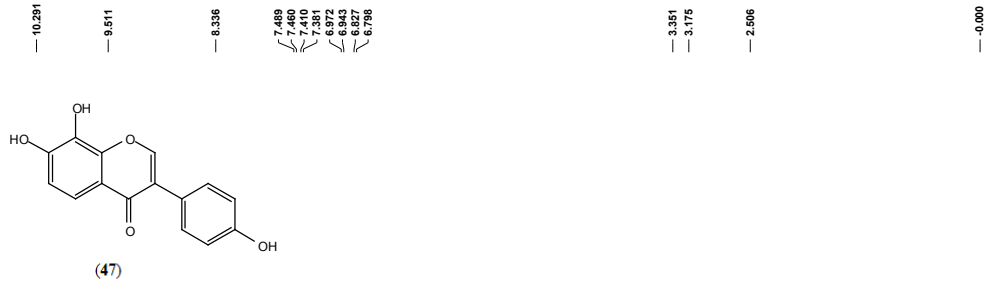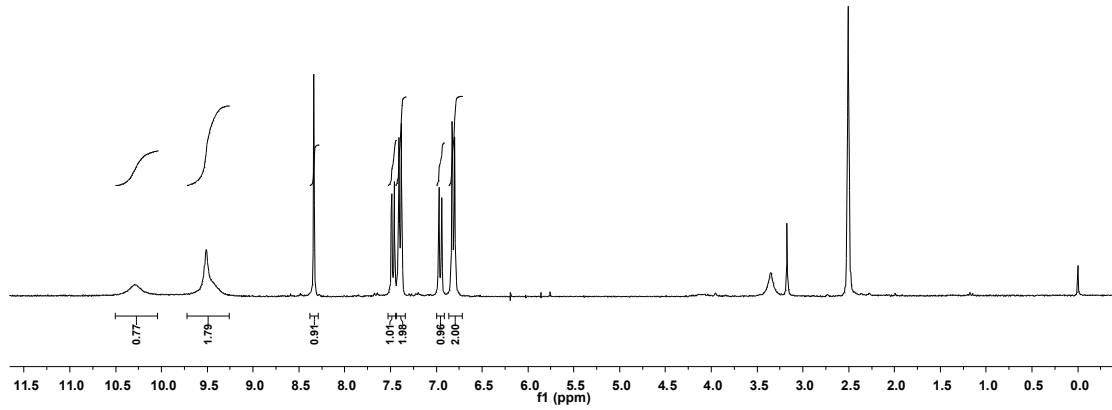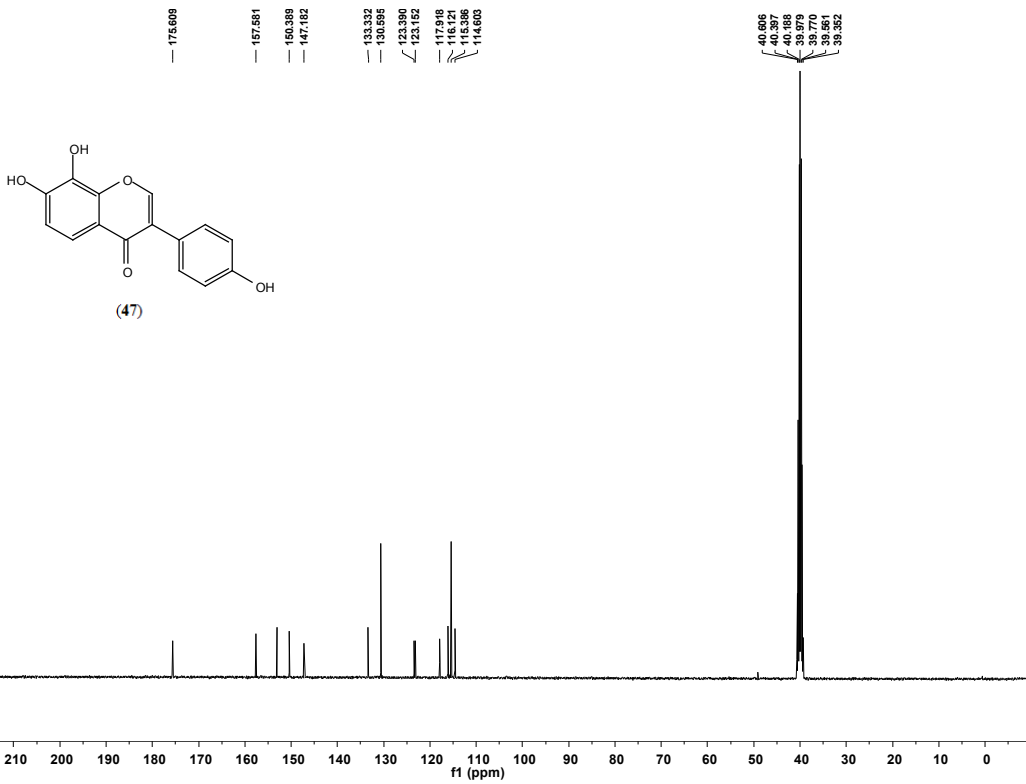

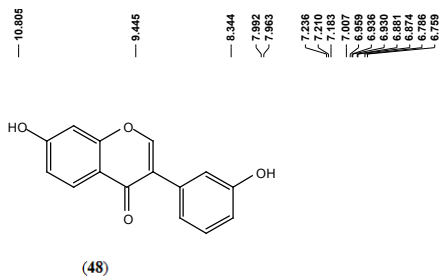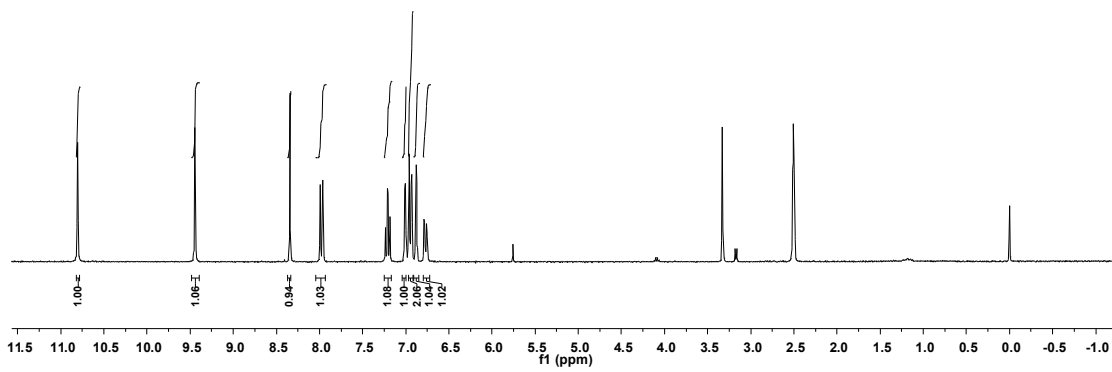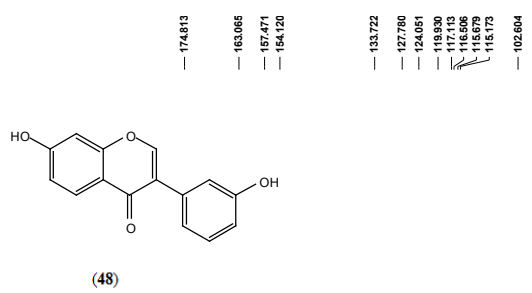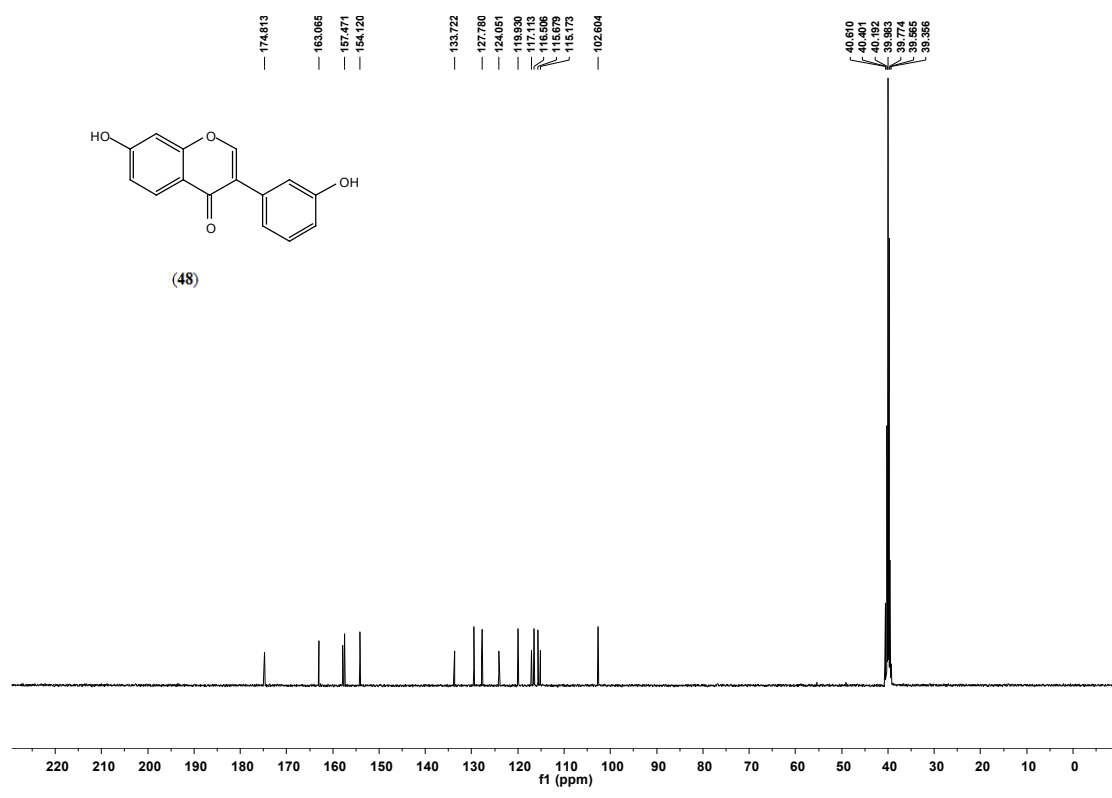

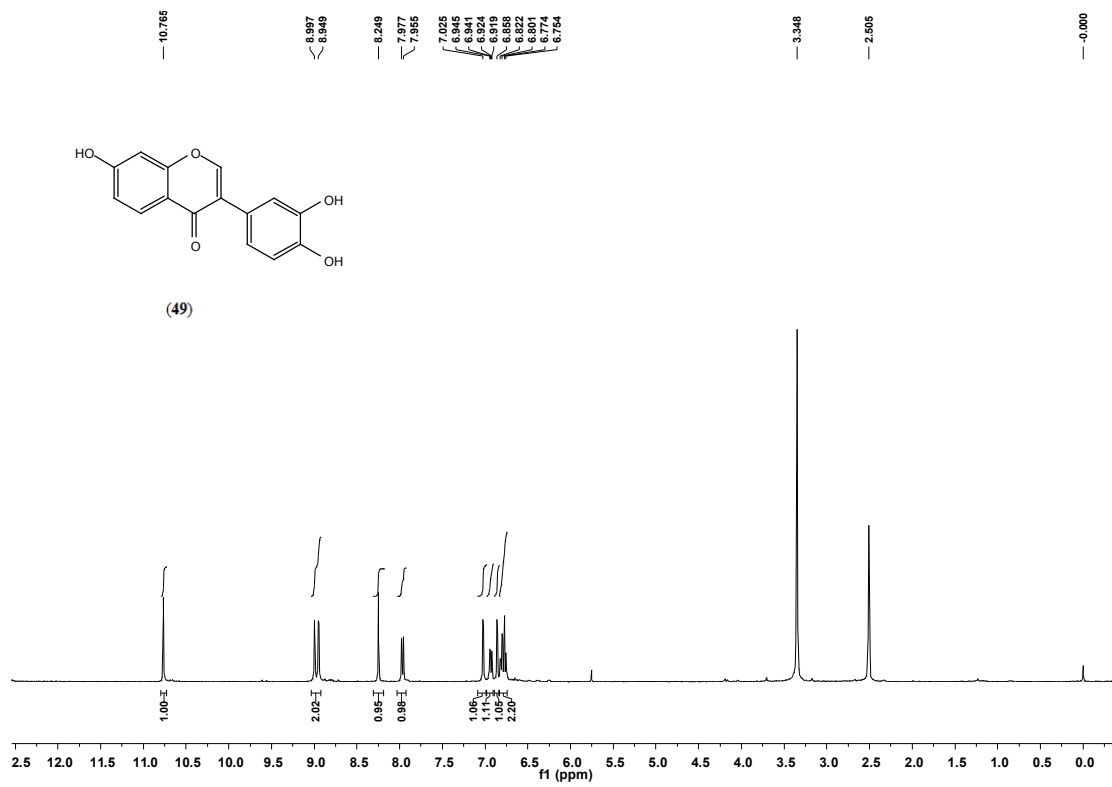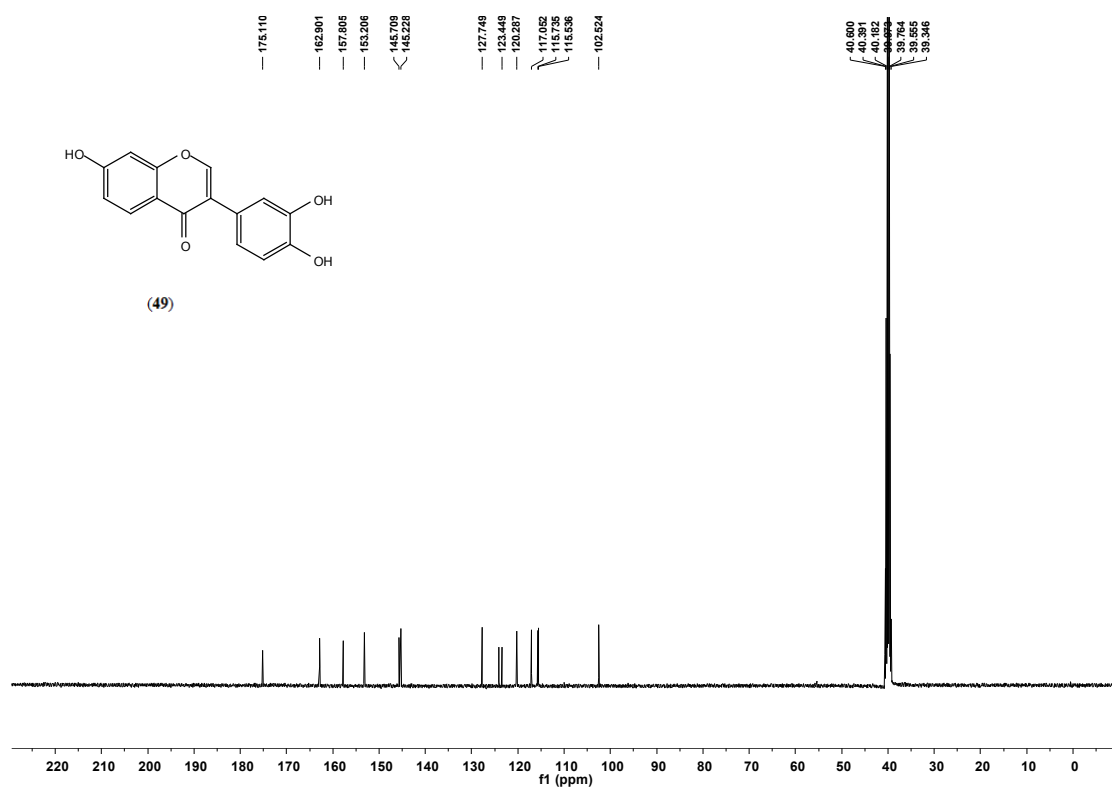



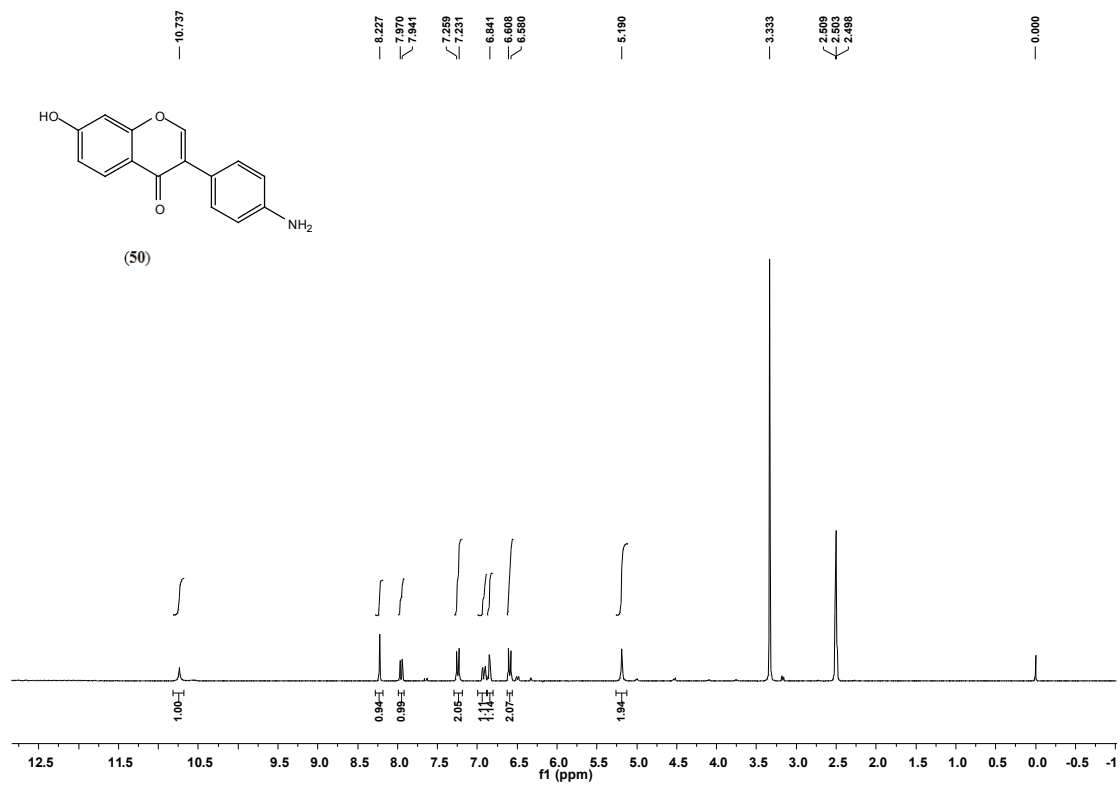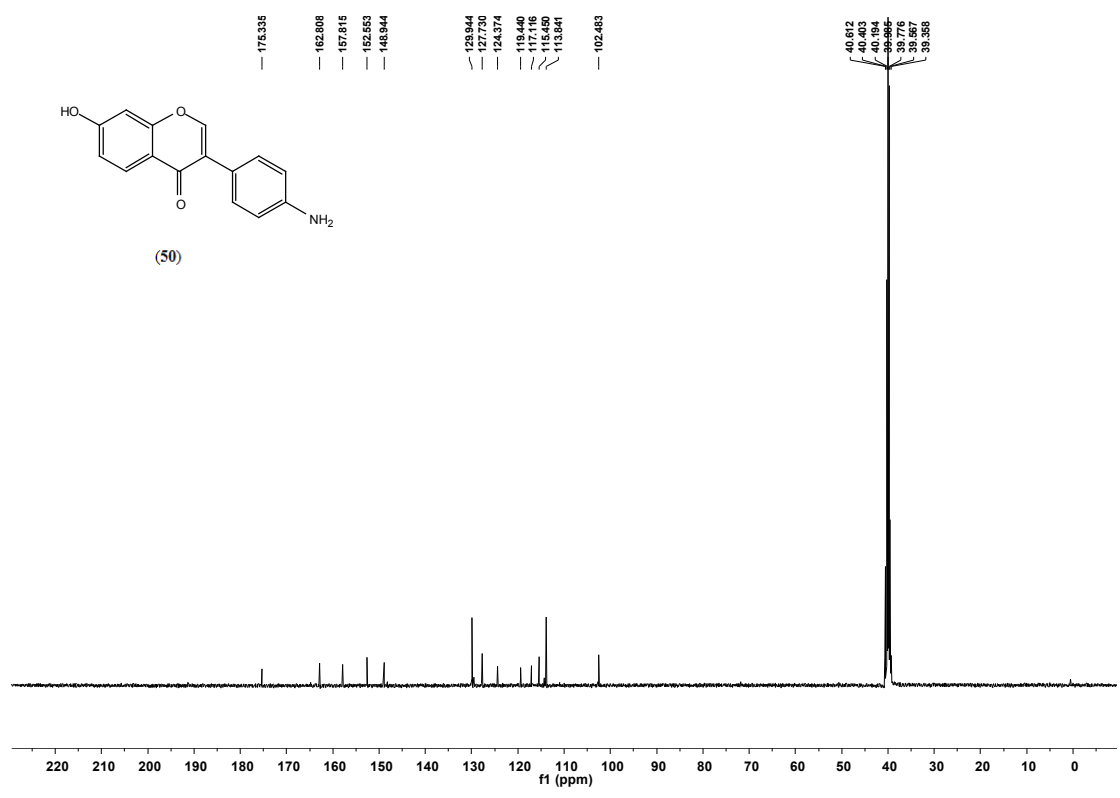

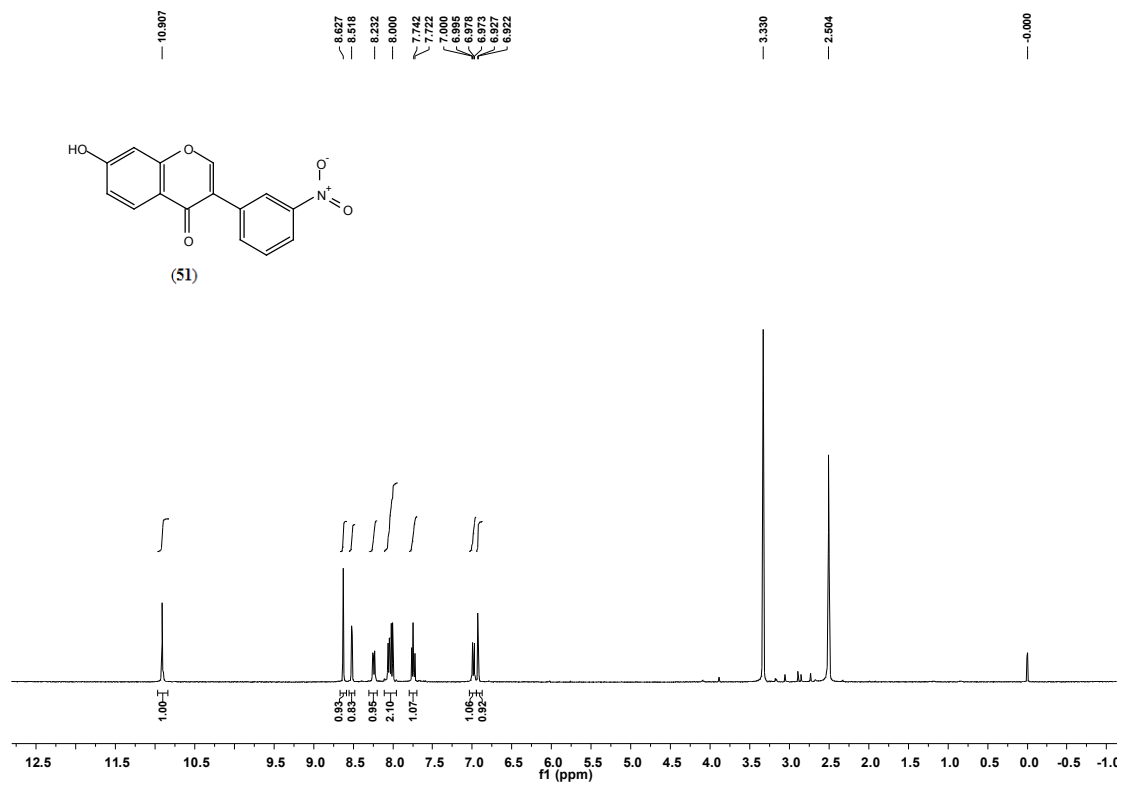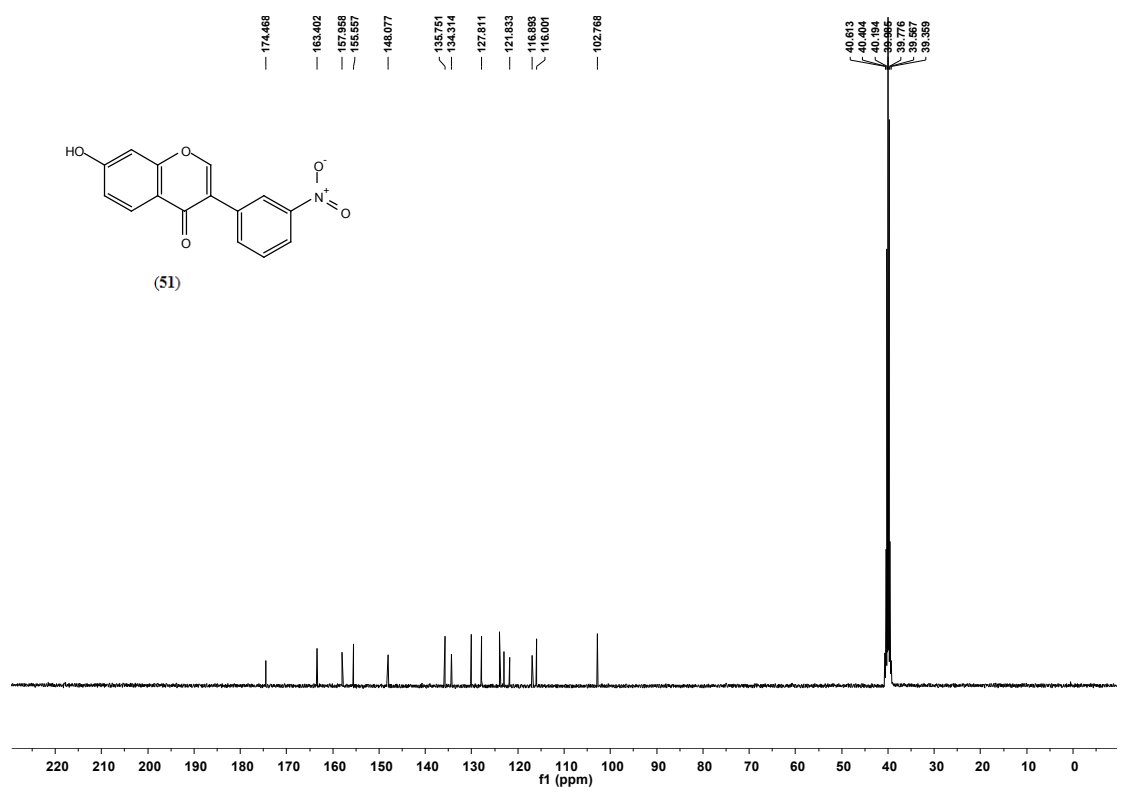

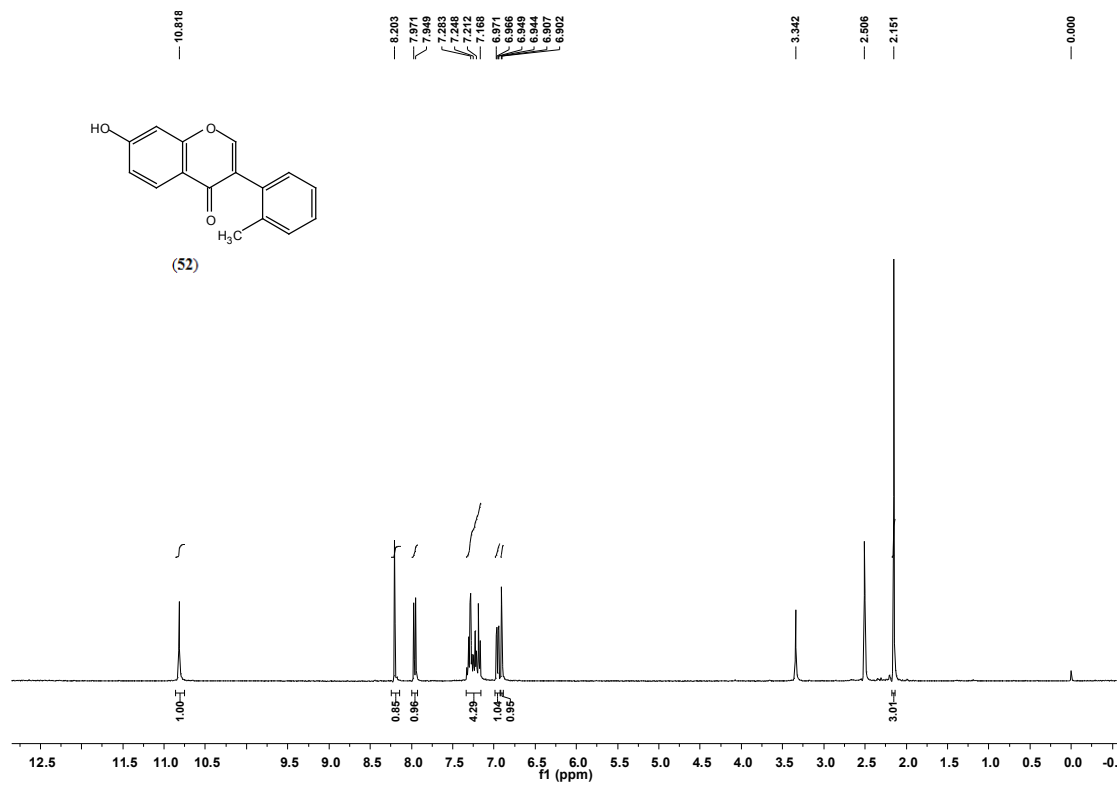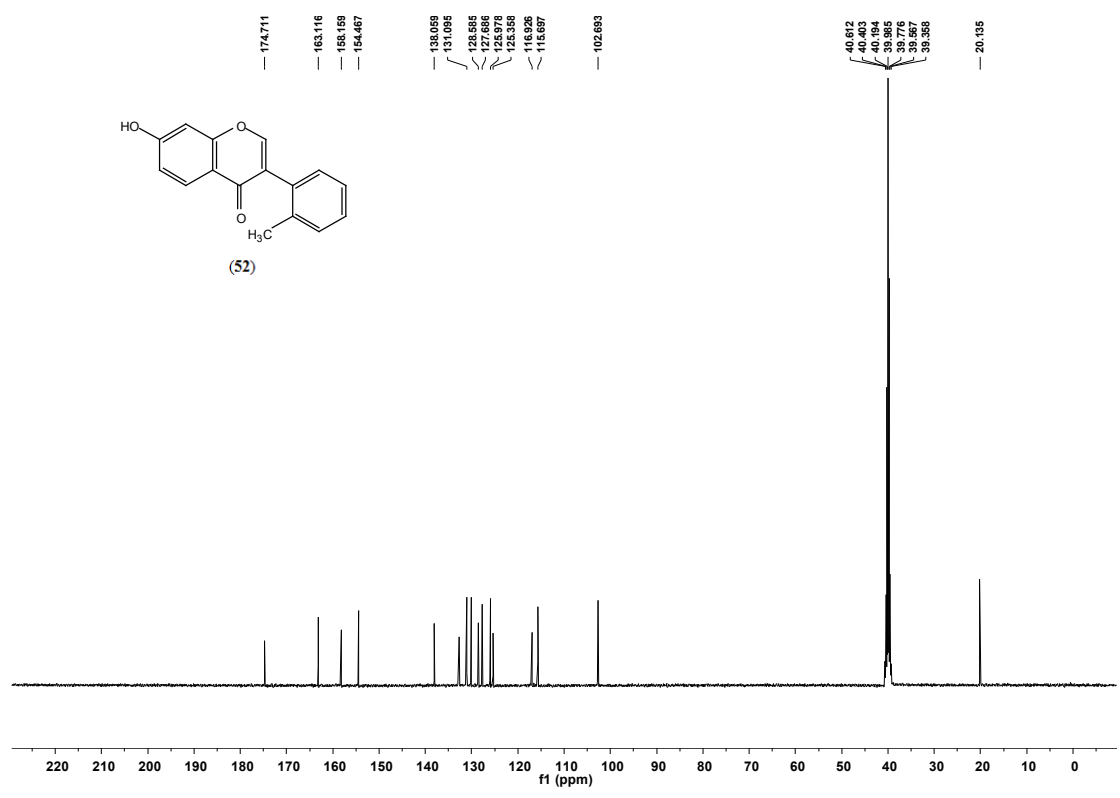

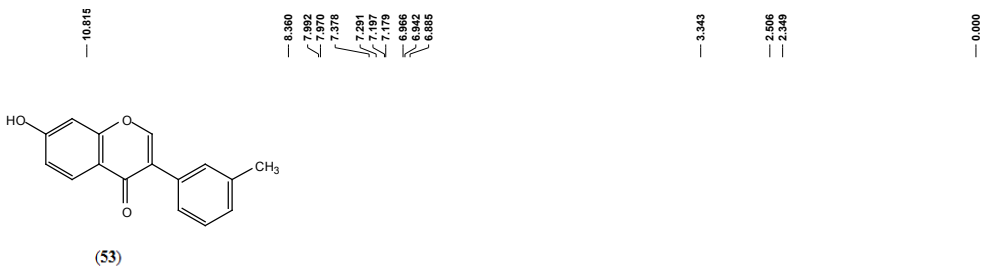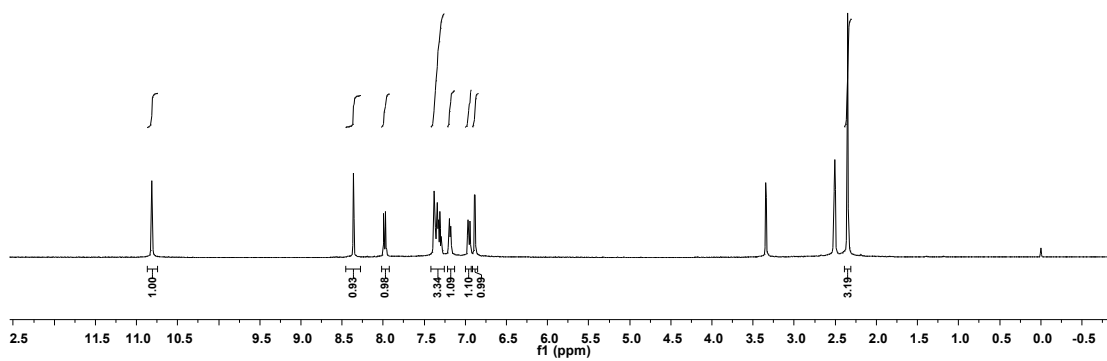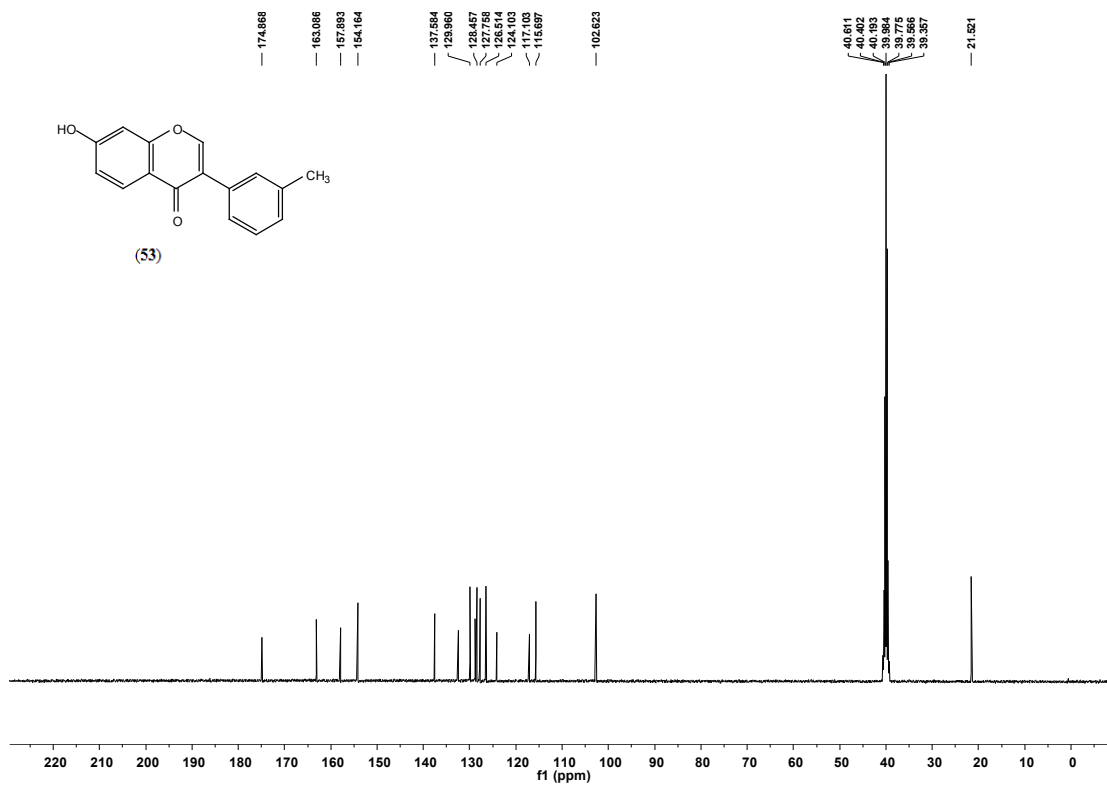

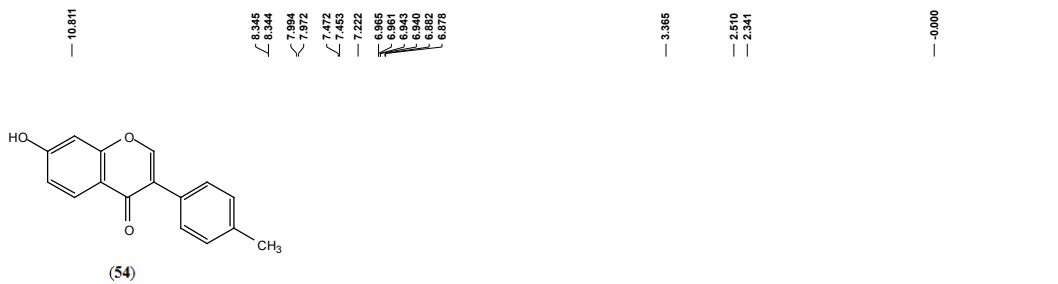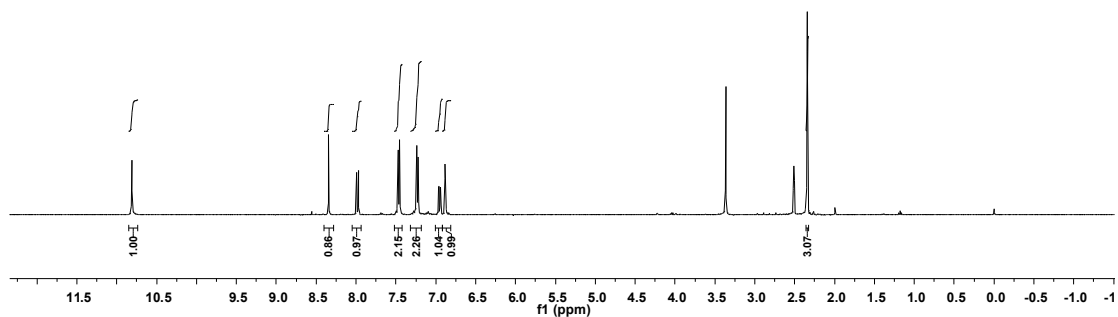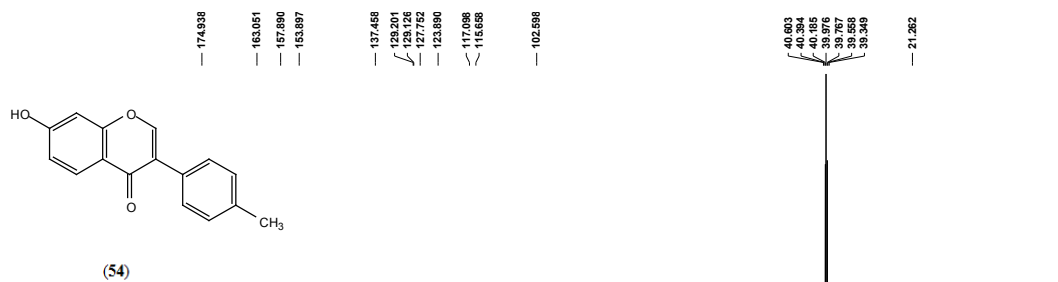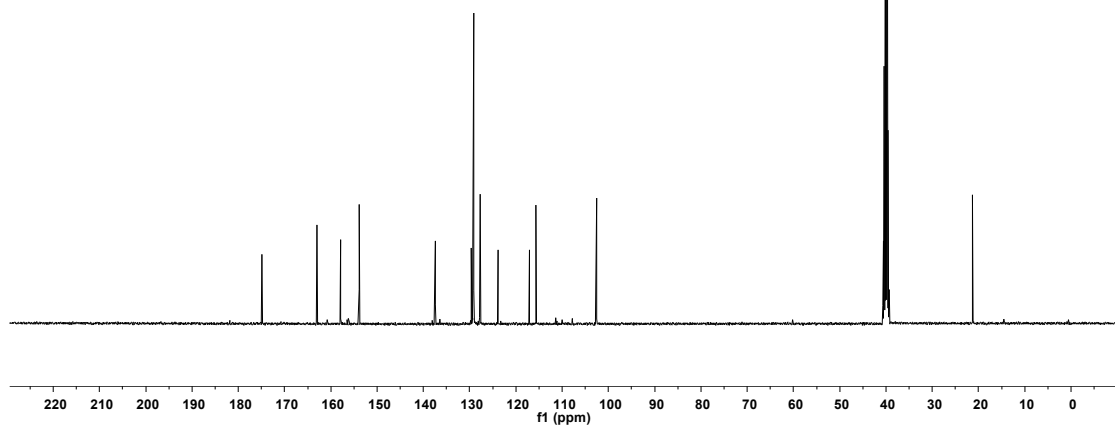

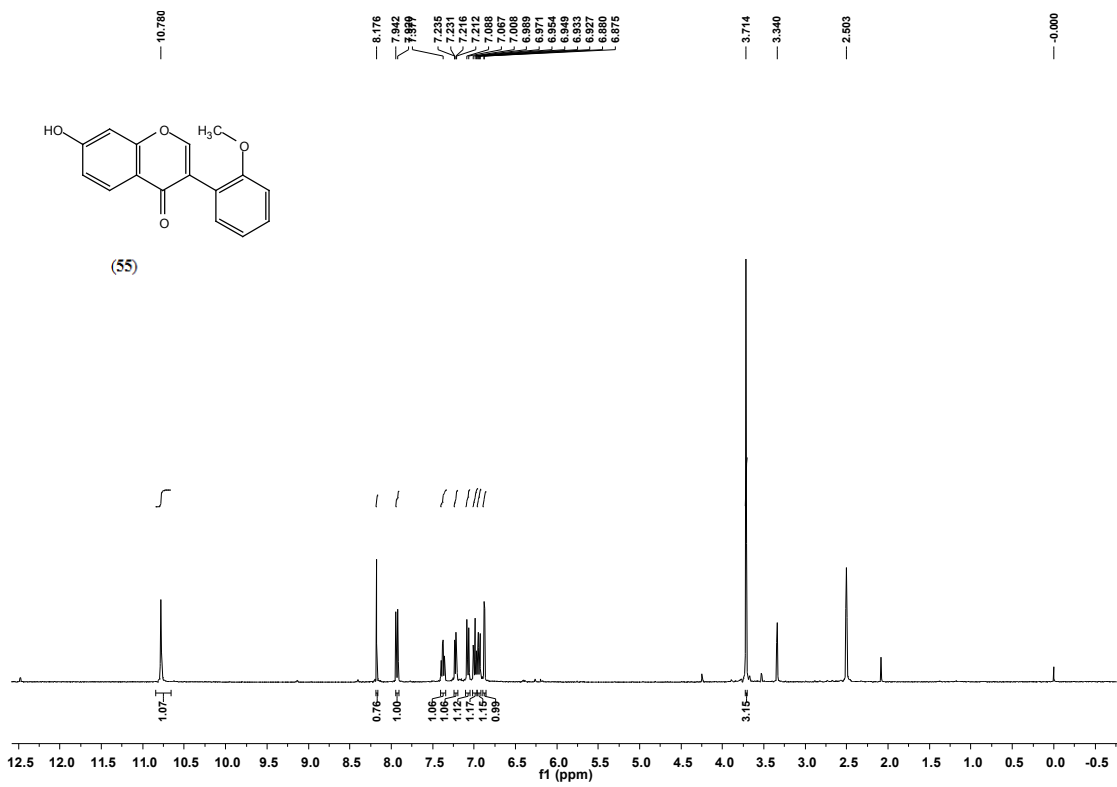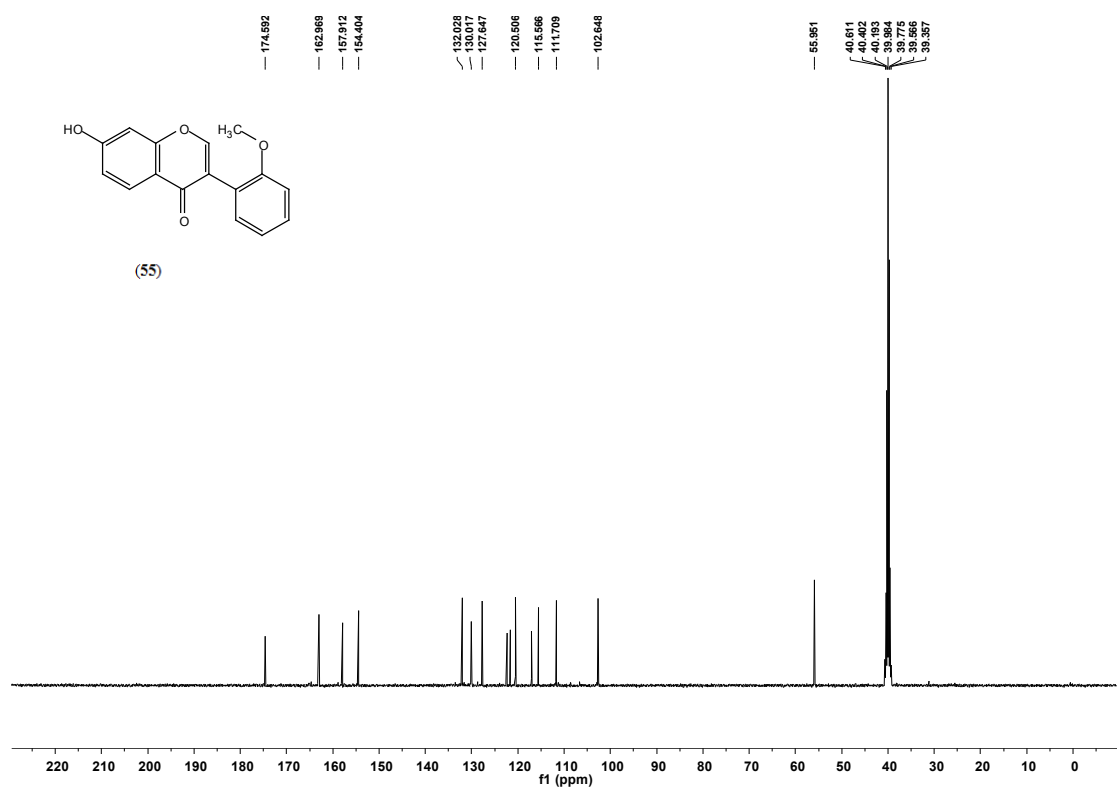

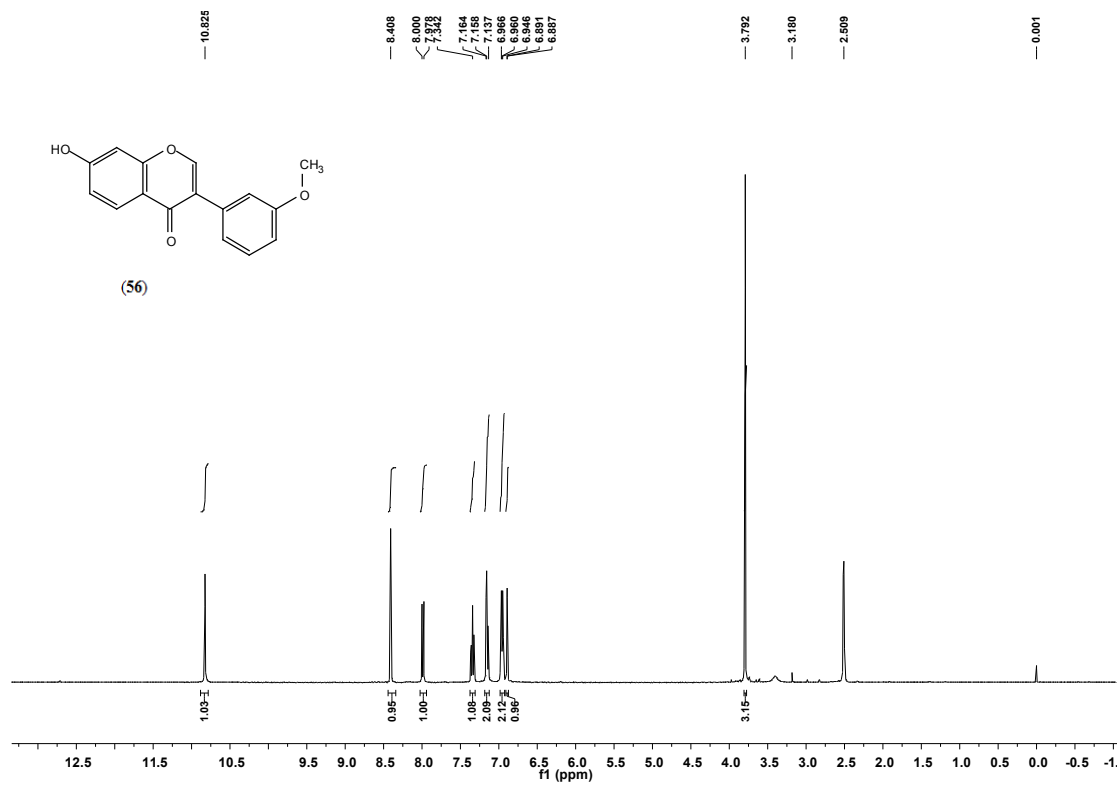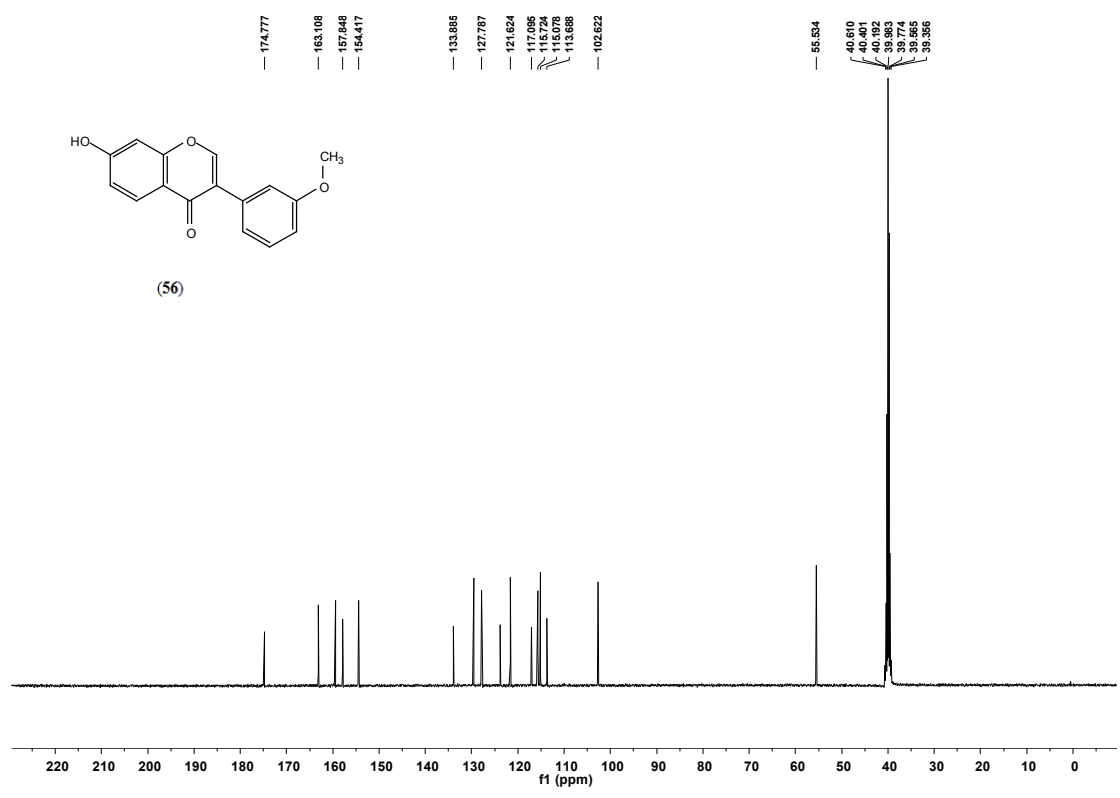

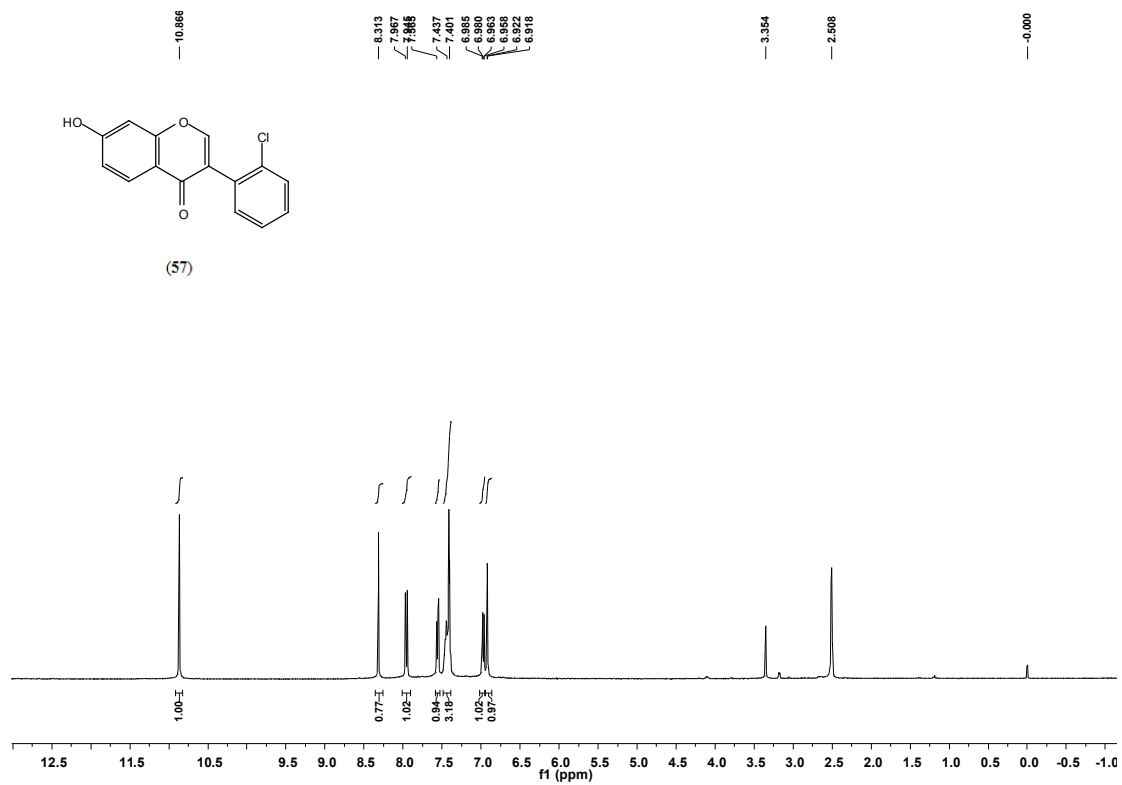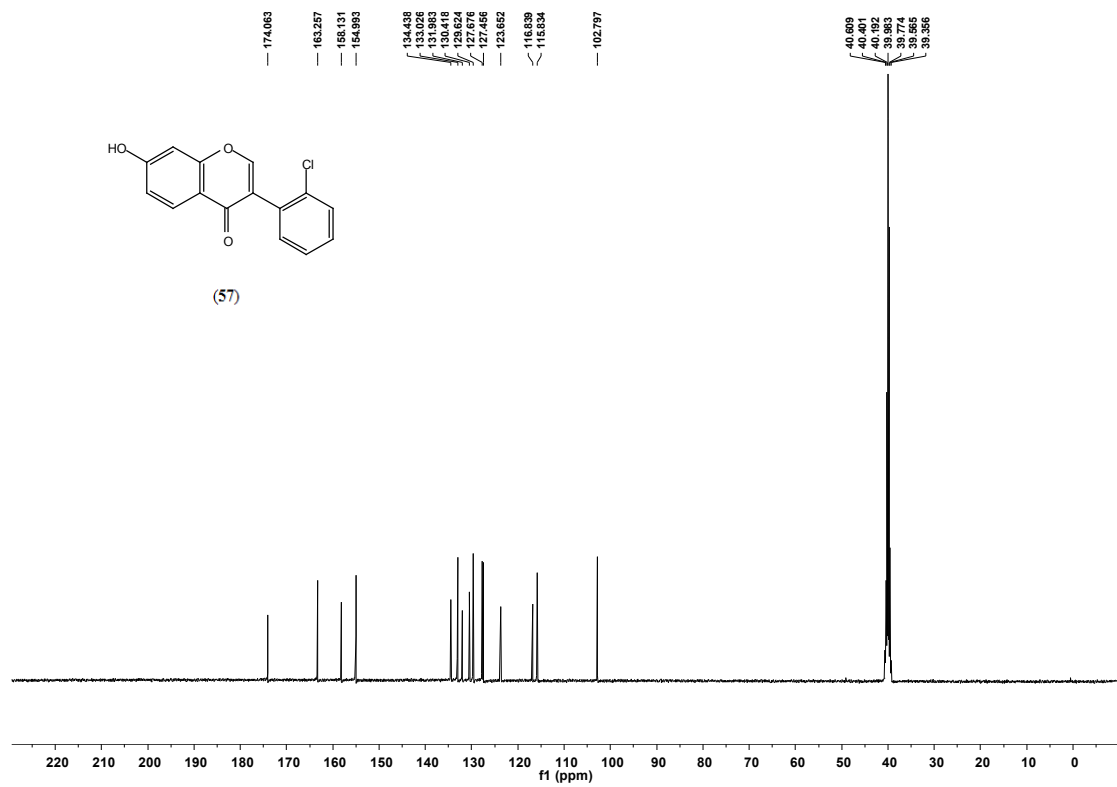



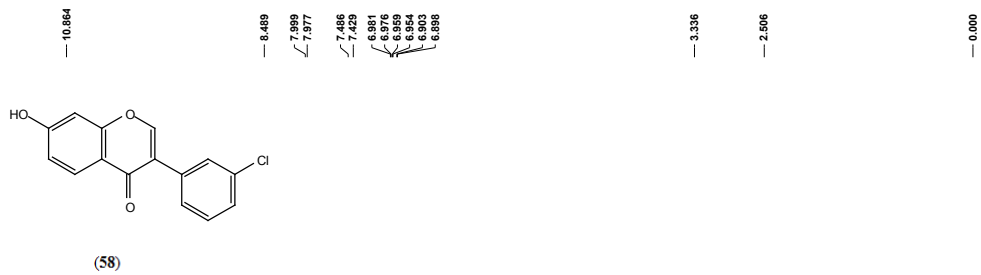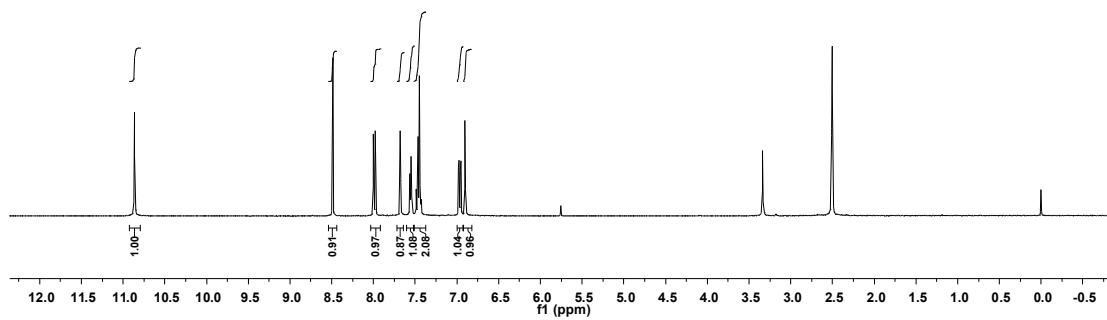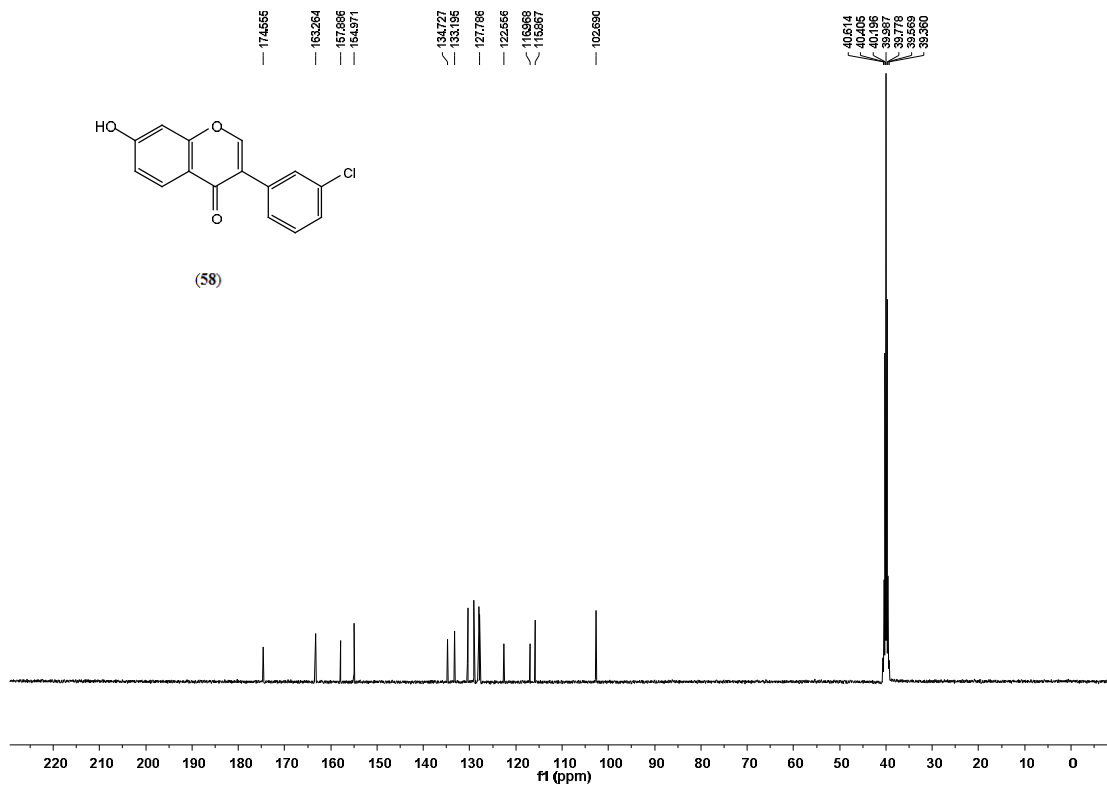

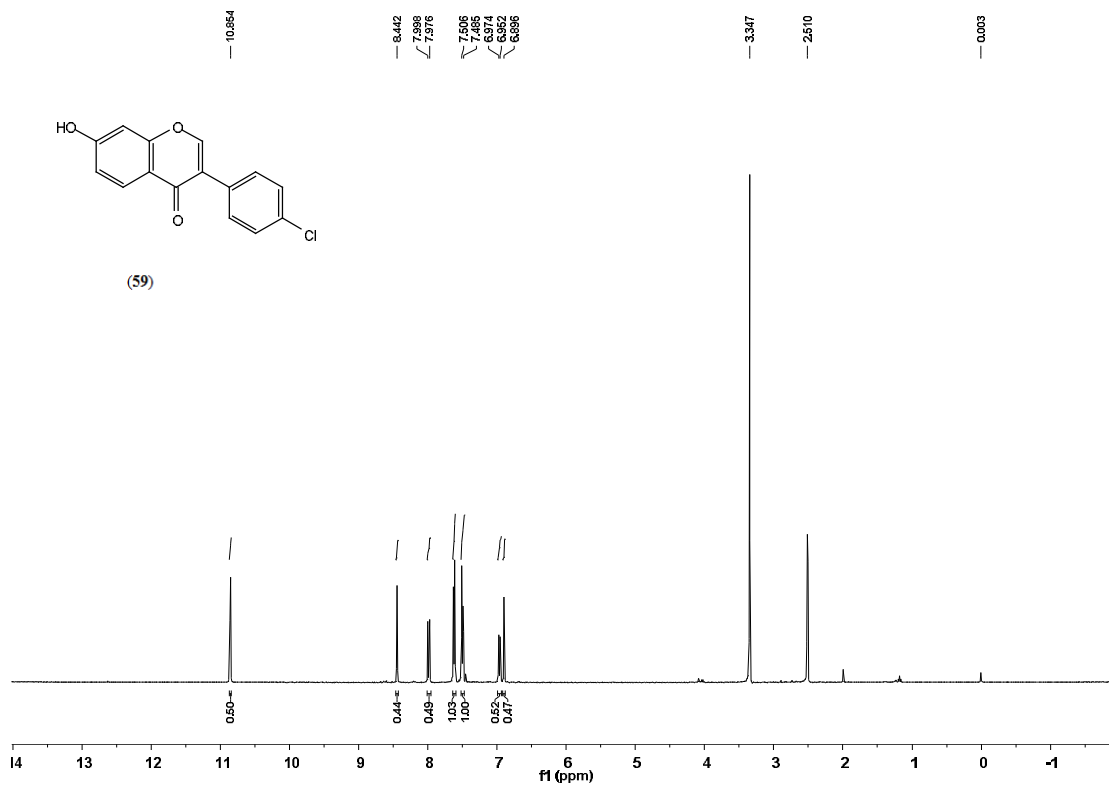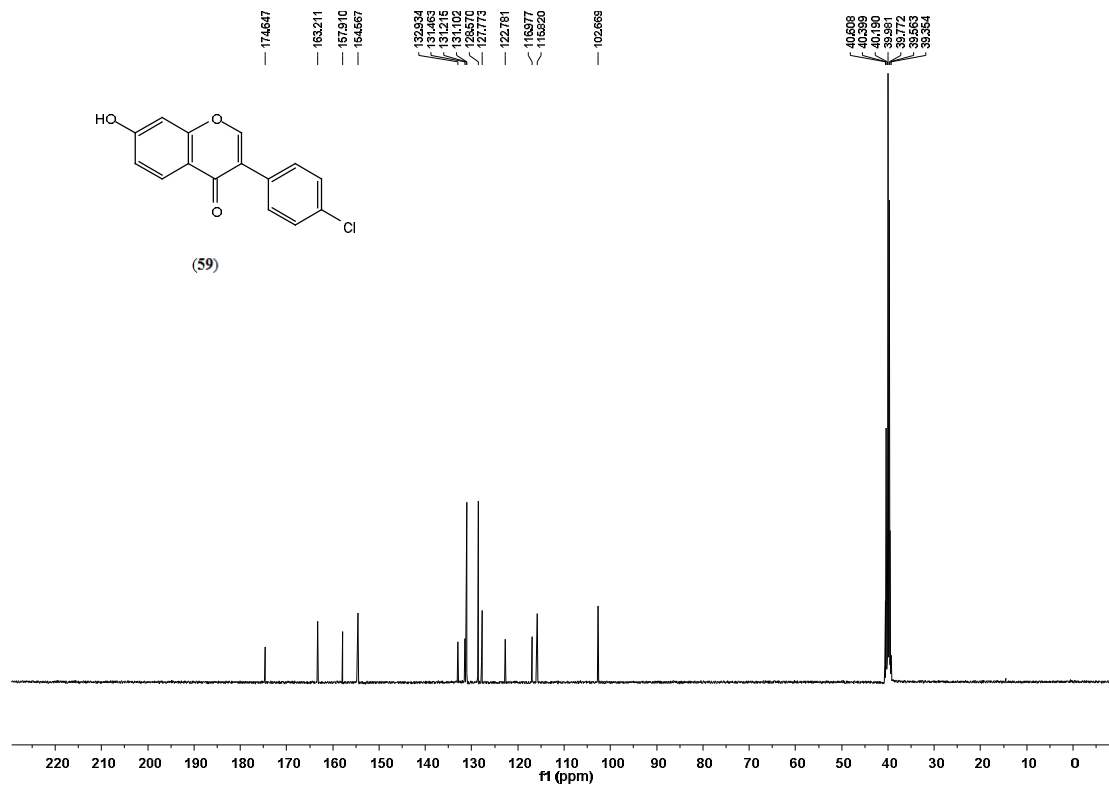

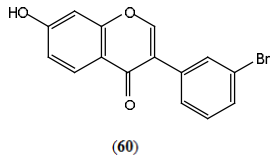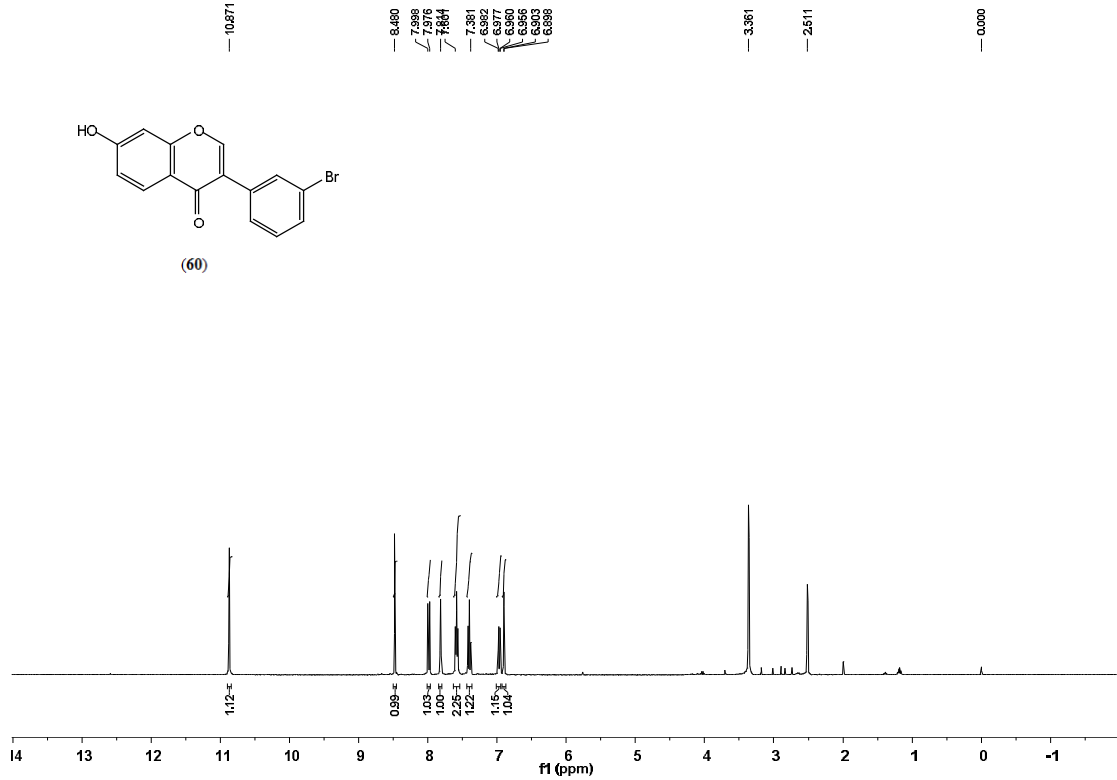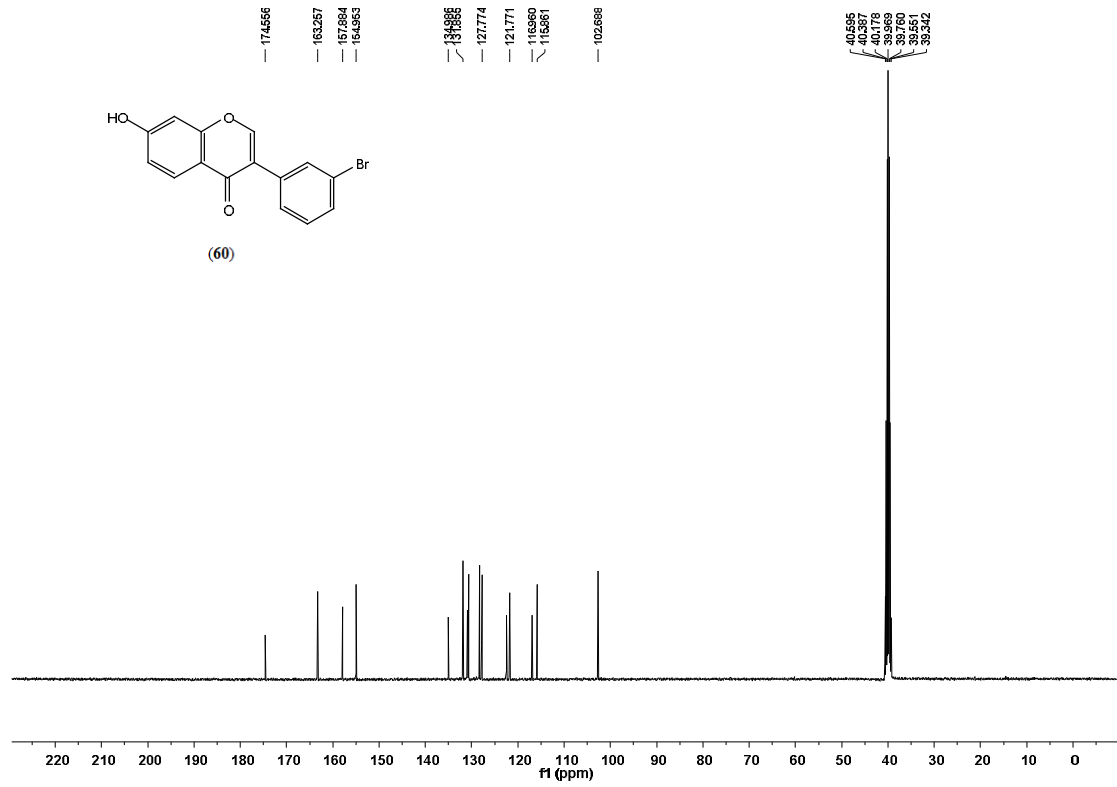

10.868  
8.448  
7.998  
7.968  
7.619  
7.534  
6.990  
6.963  
6.936  
6.914  
6.889  
6.862  
3.328  
2.504  
0.000

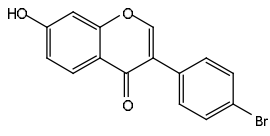

(61)

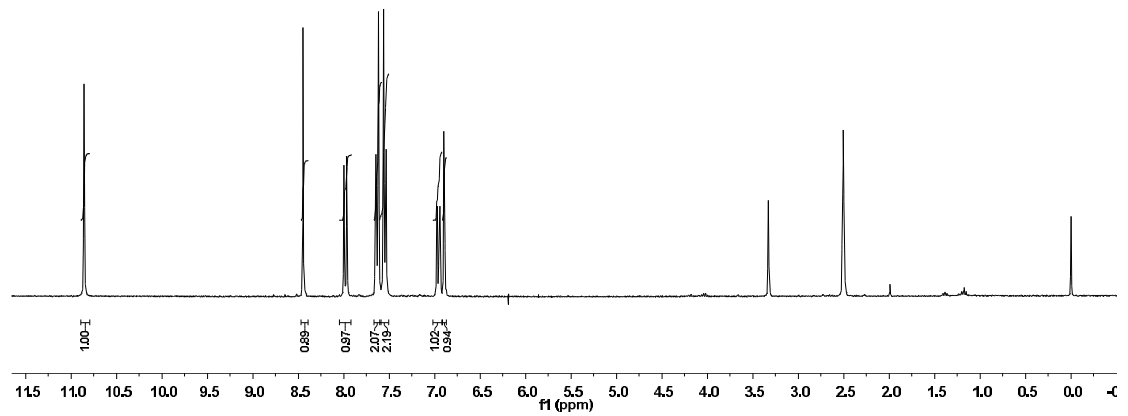

174.696  
163.219  
157.012  
164.657  
131.651  
131.650  
131.428  
127.781  
121.526  
116.977  
116.937  
102.679  
40.617  
40.408  
40.199  
39.991  
39.782  
39.573

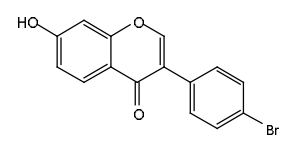

(61)

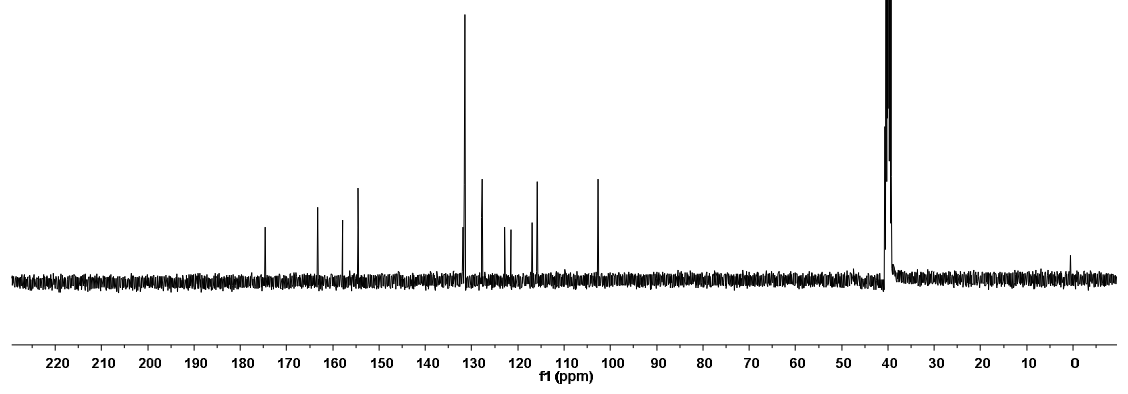

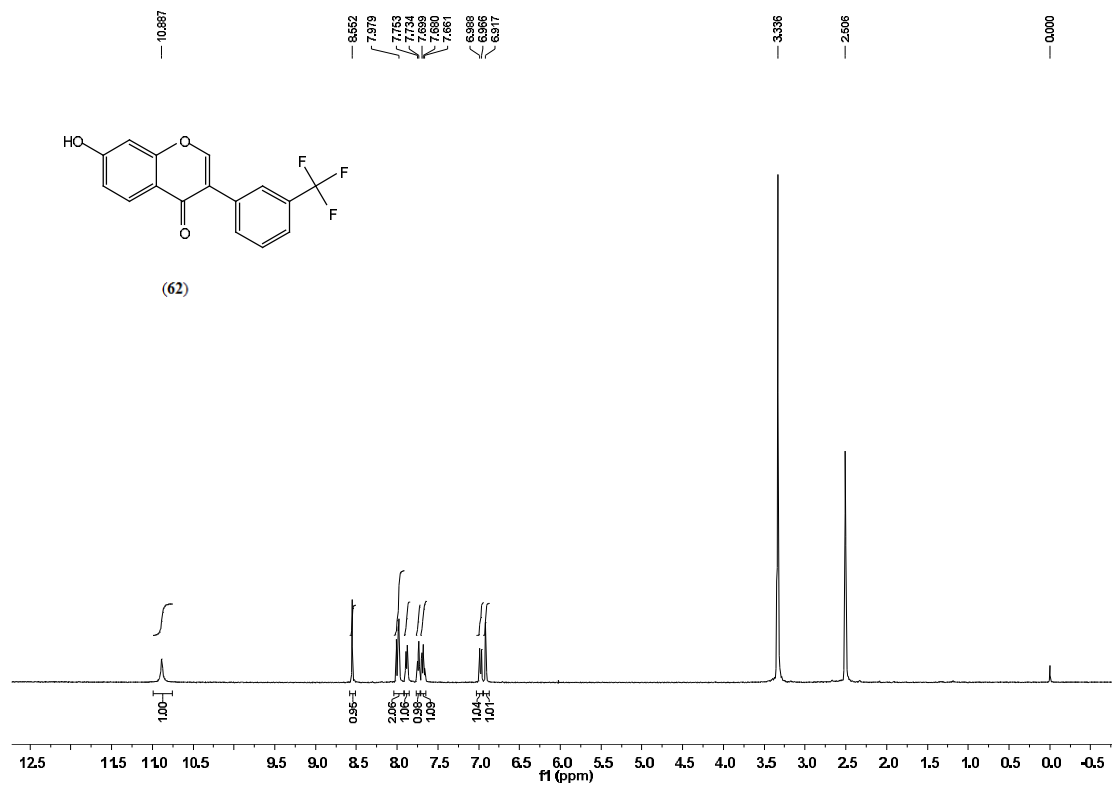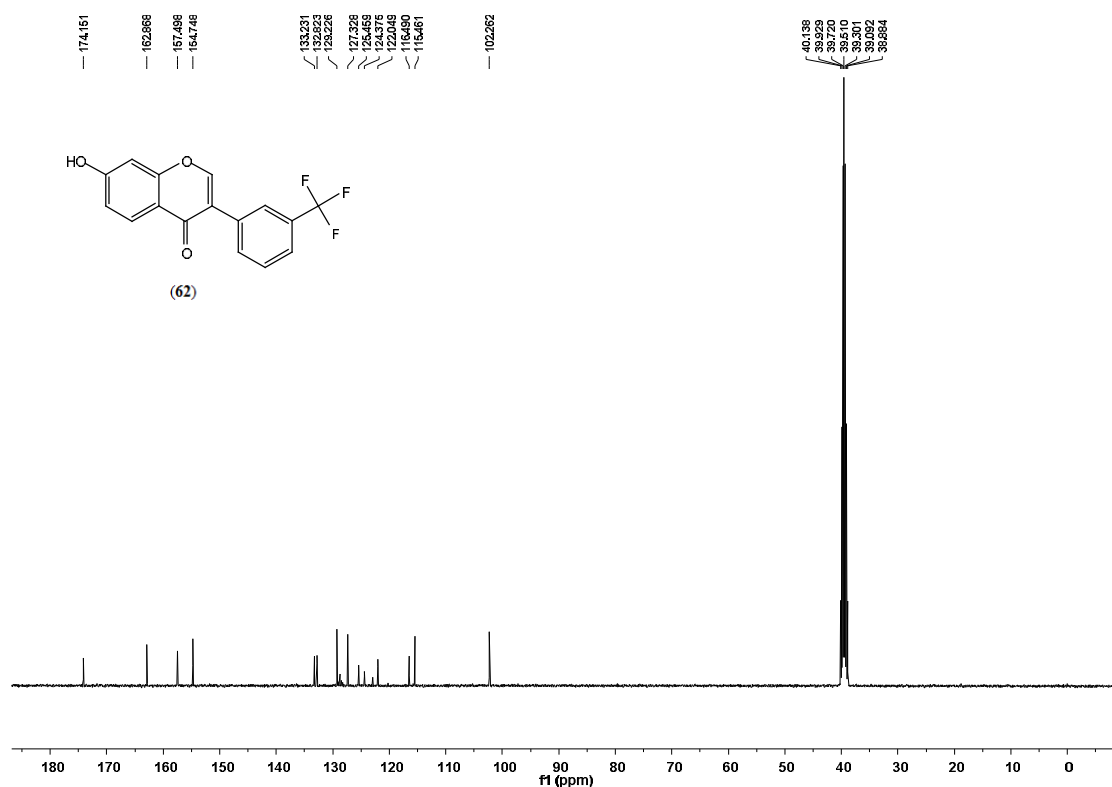

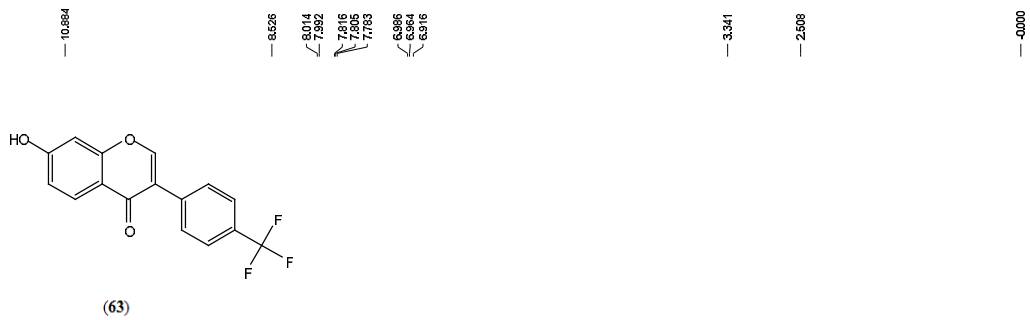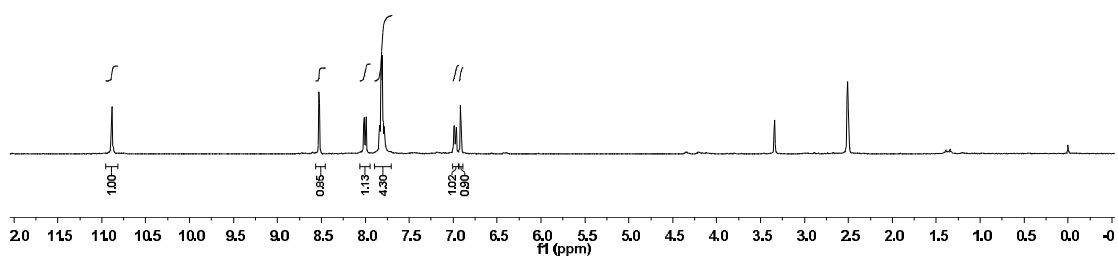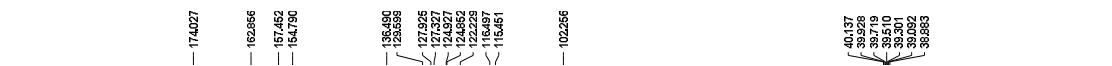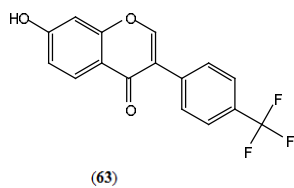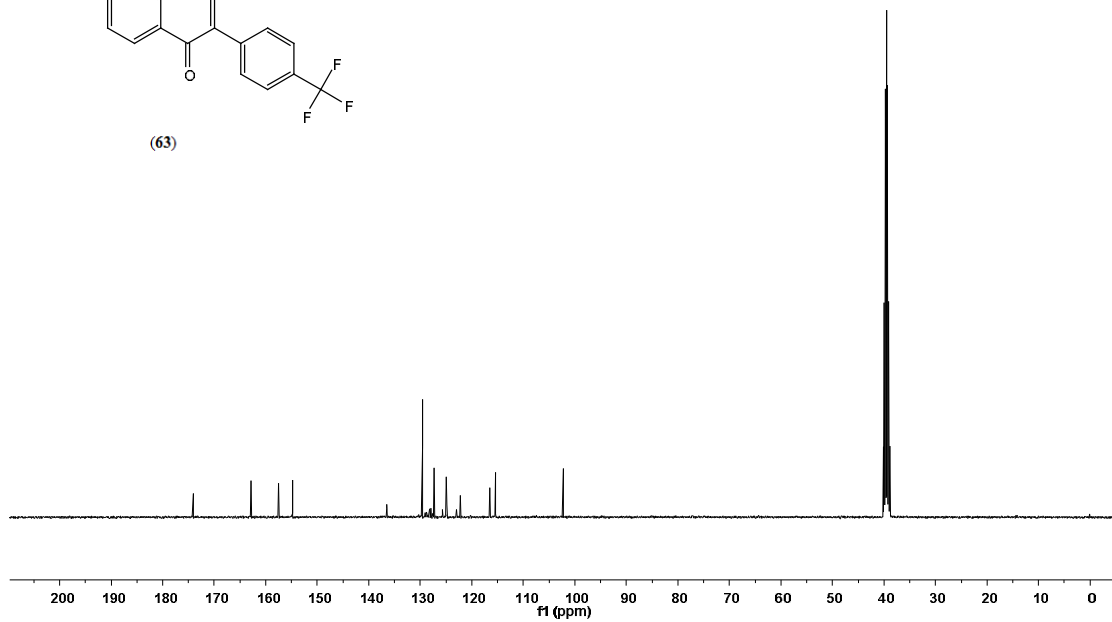

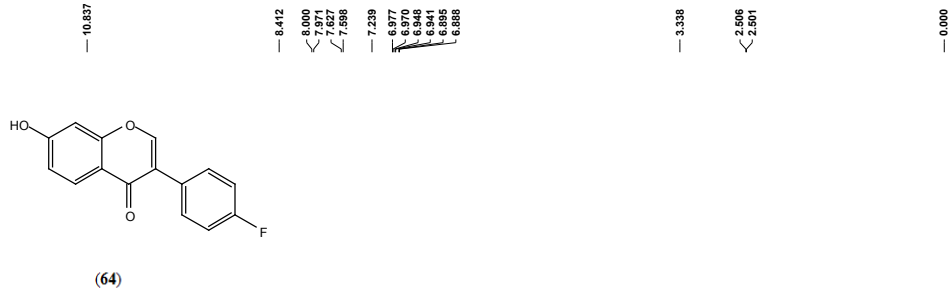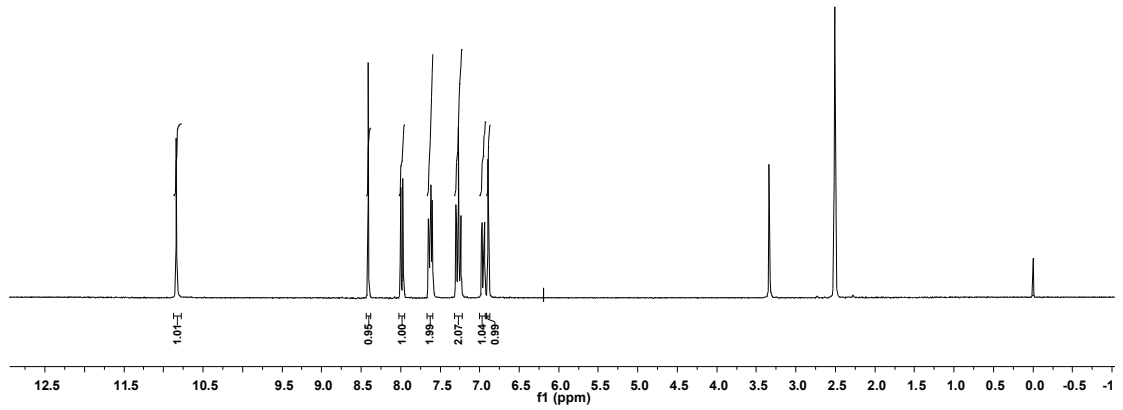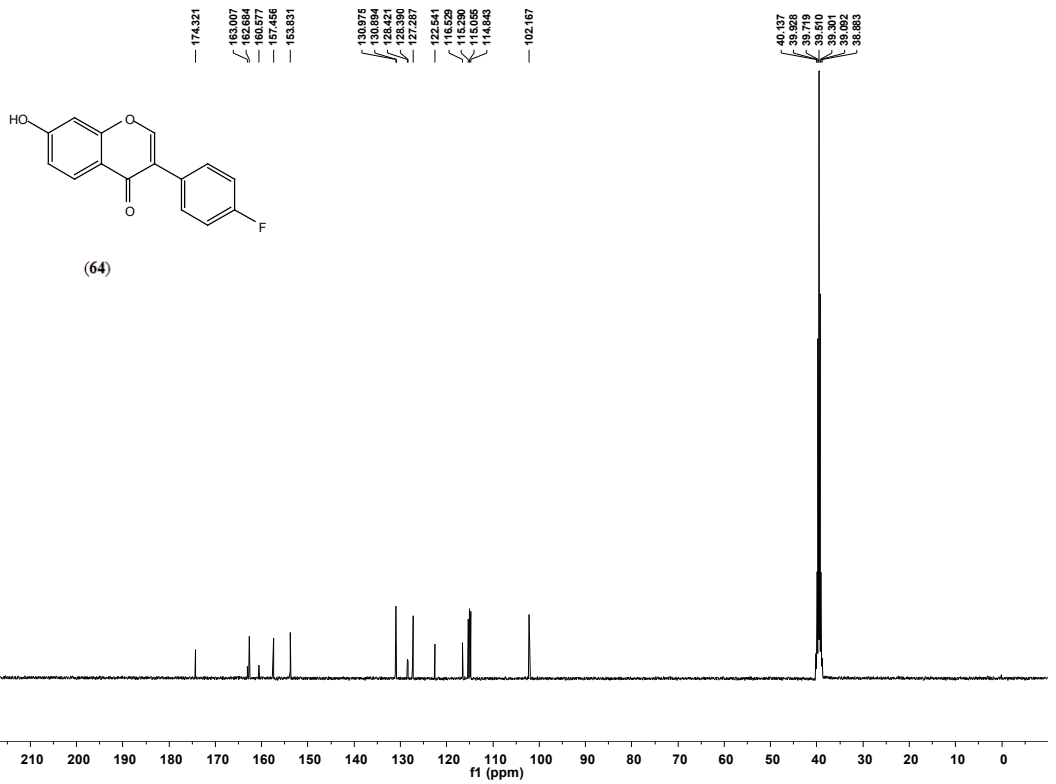

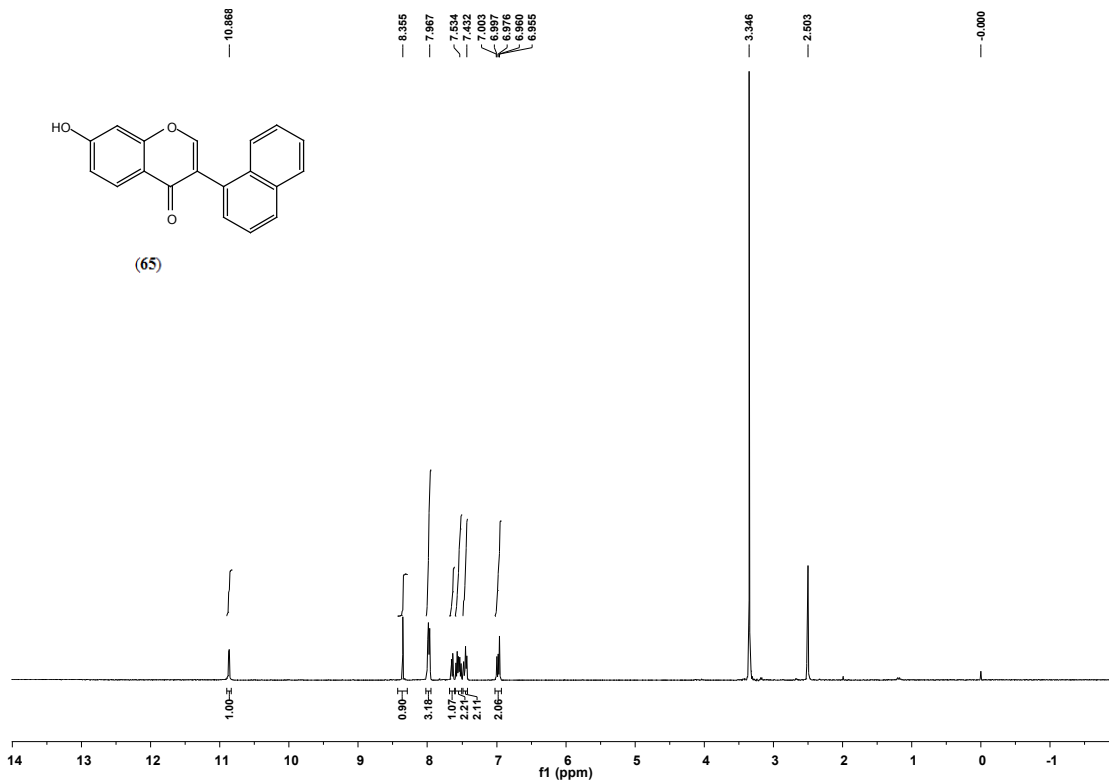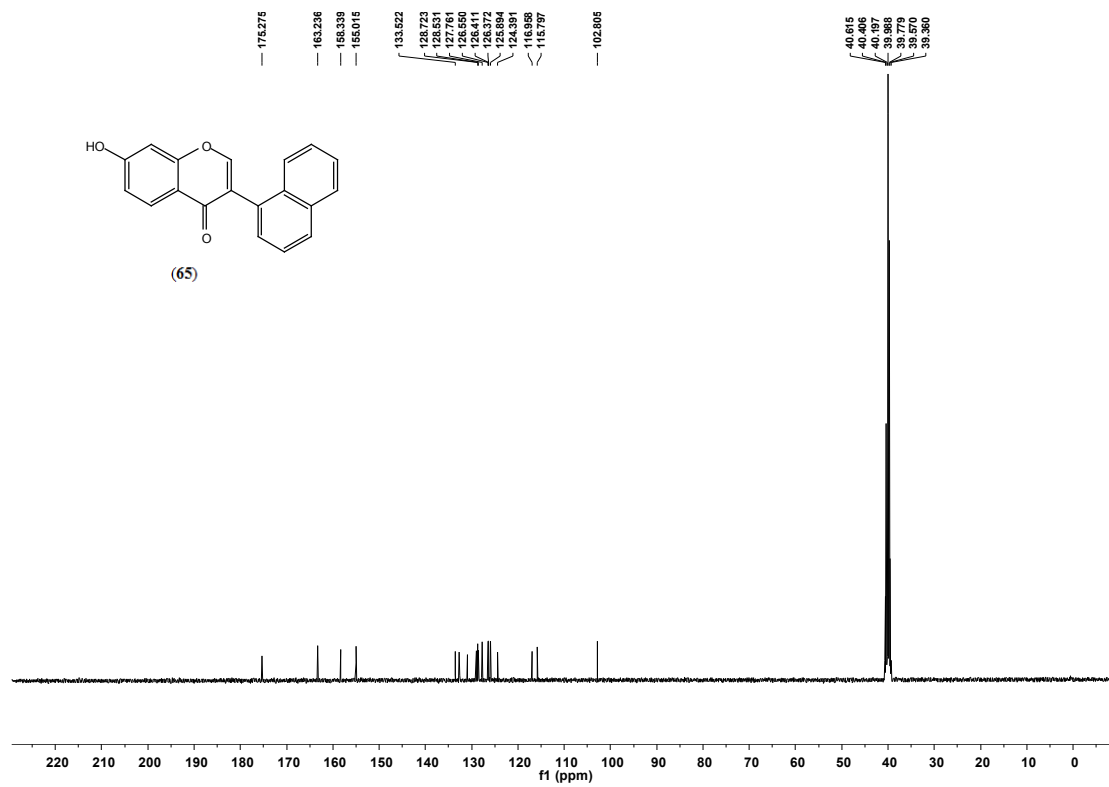



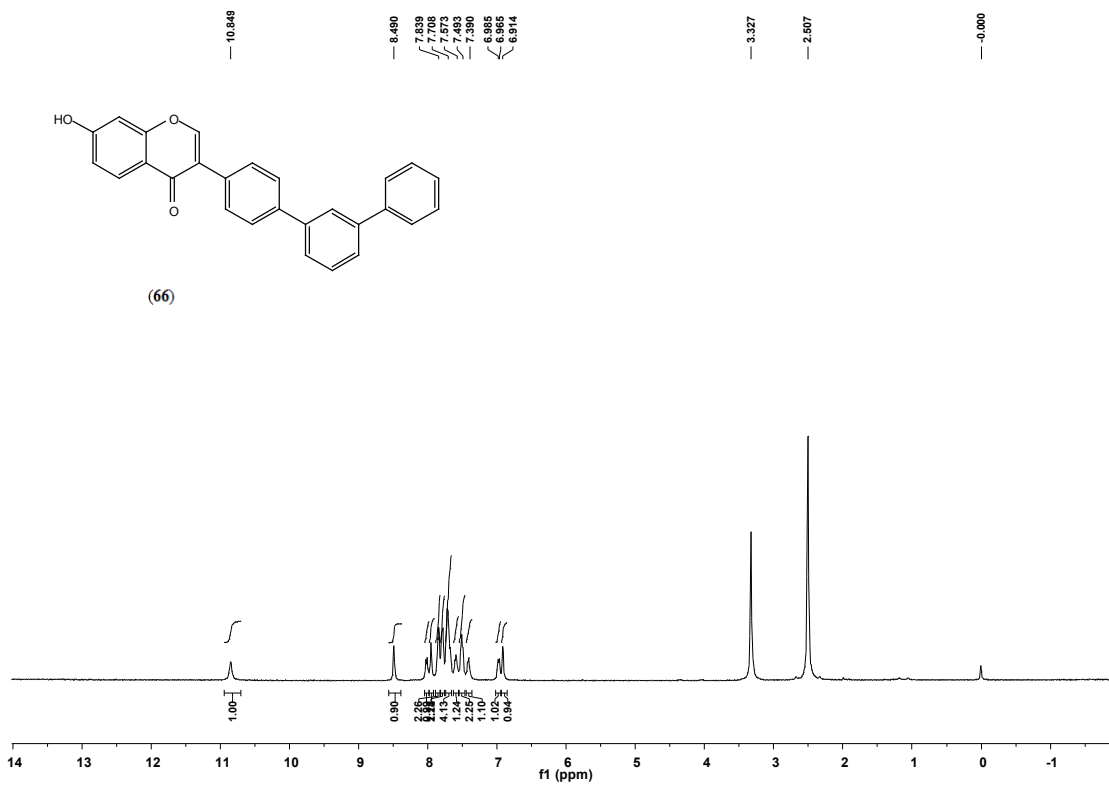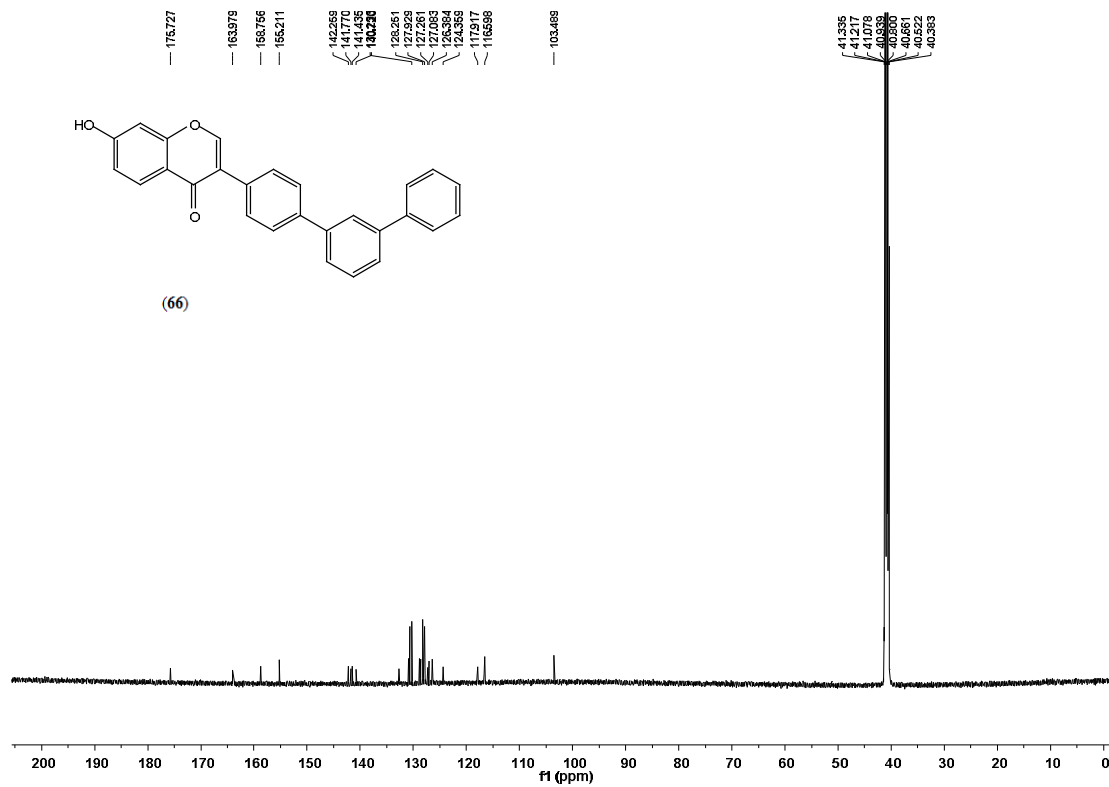

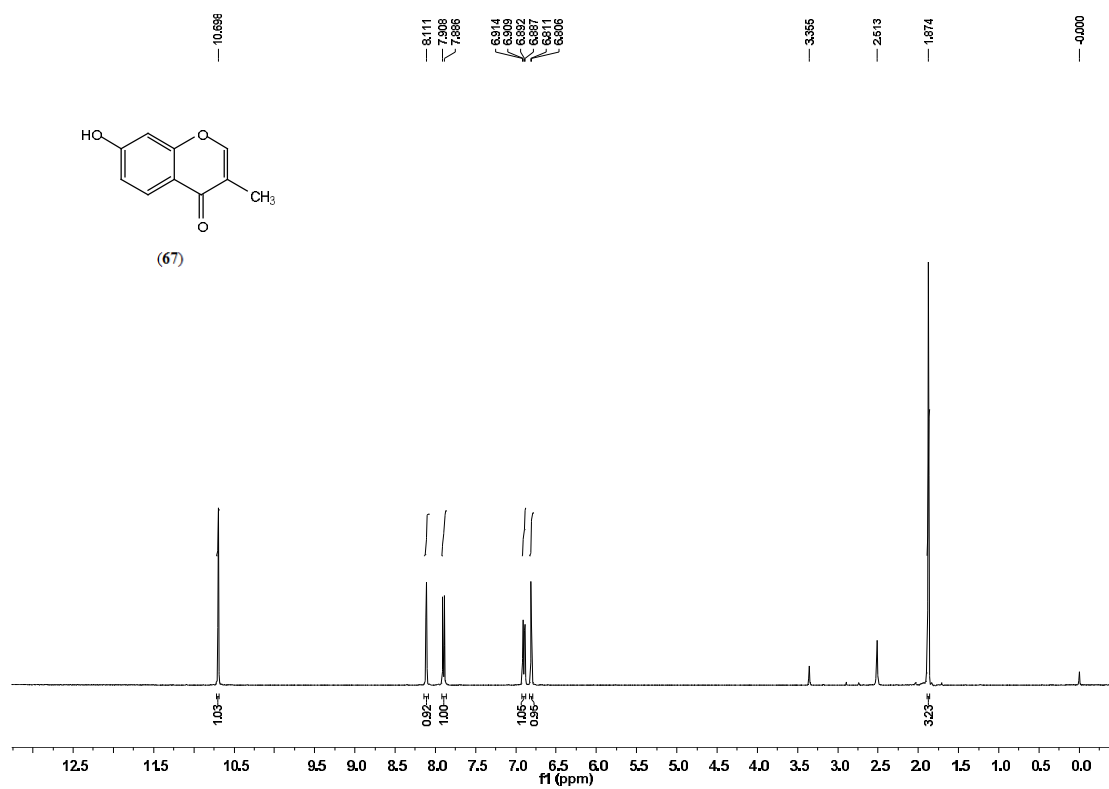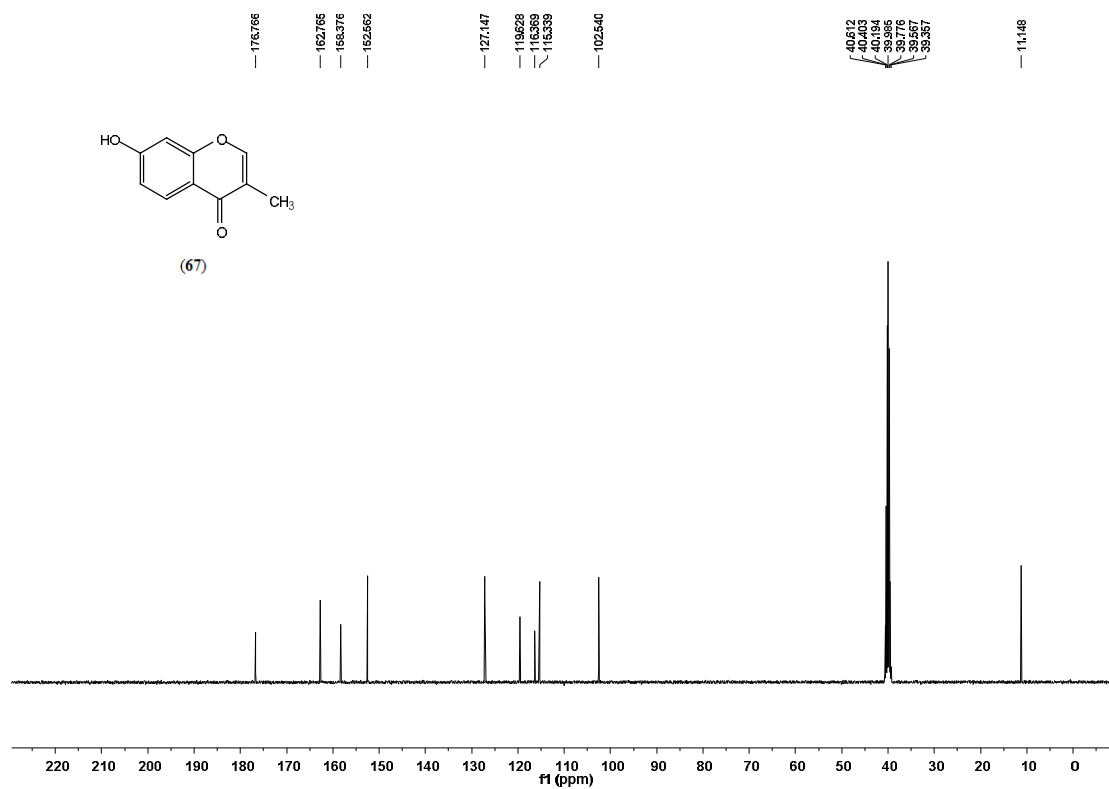

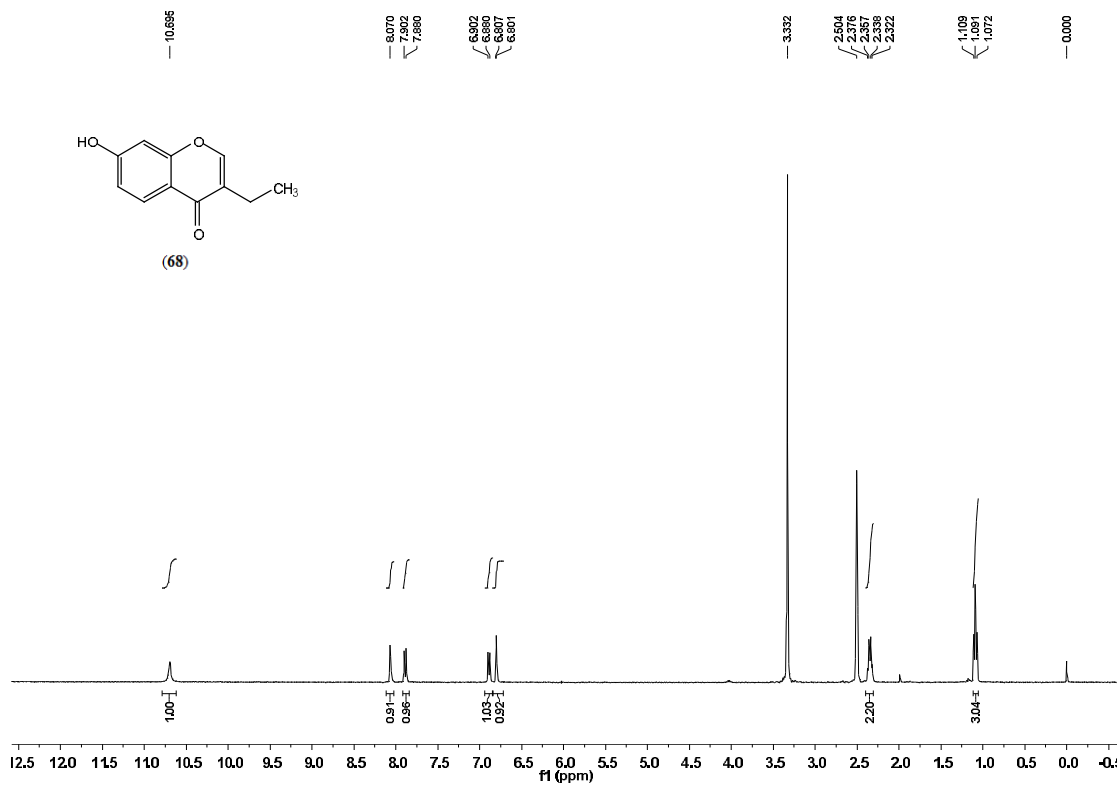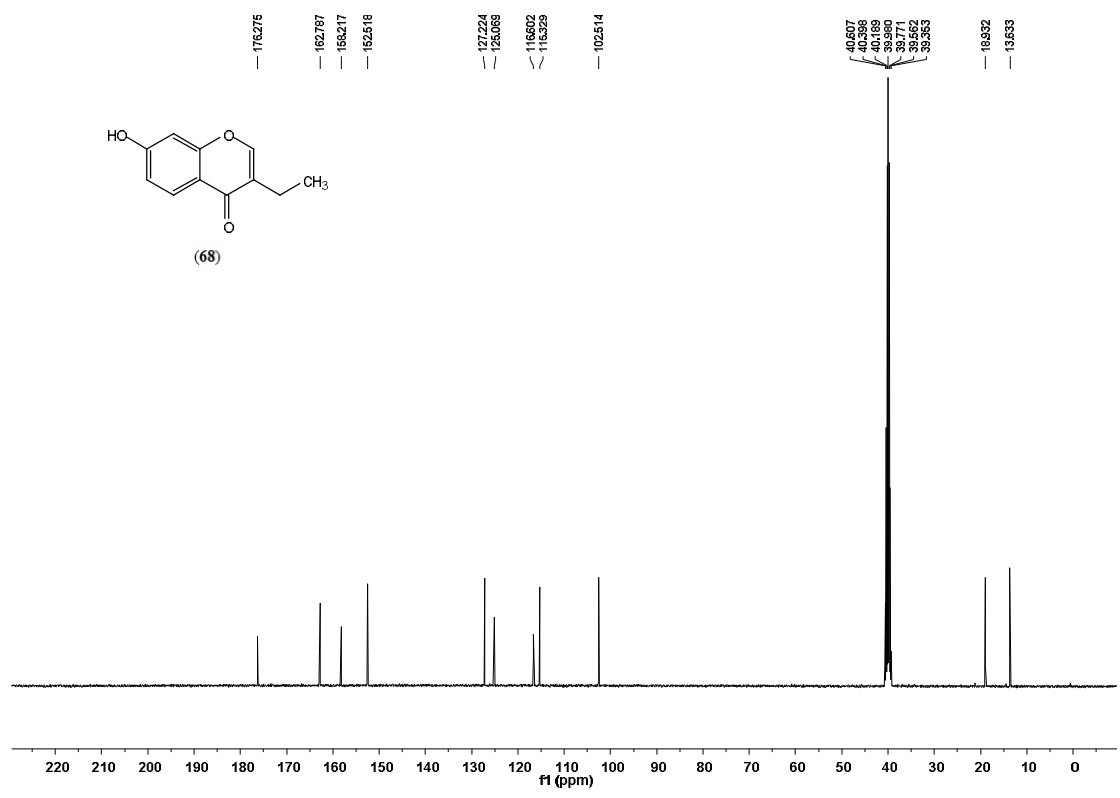

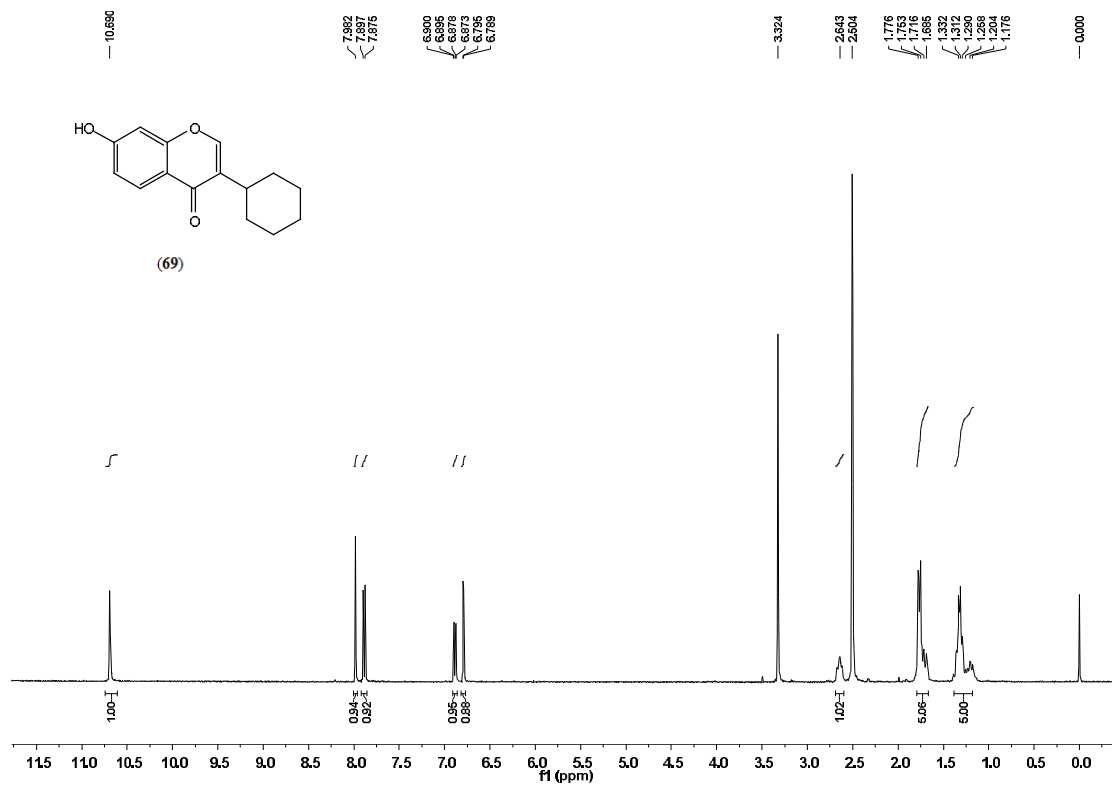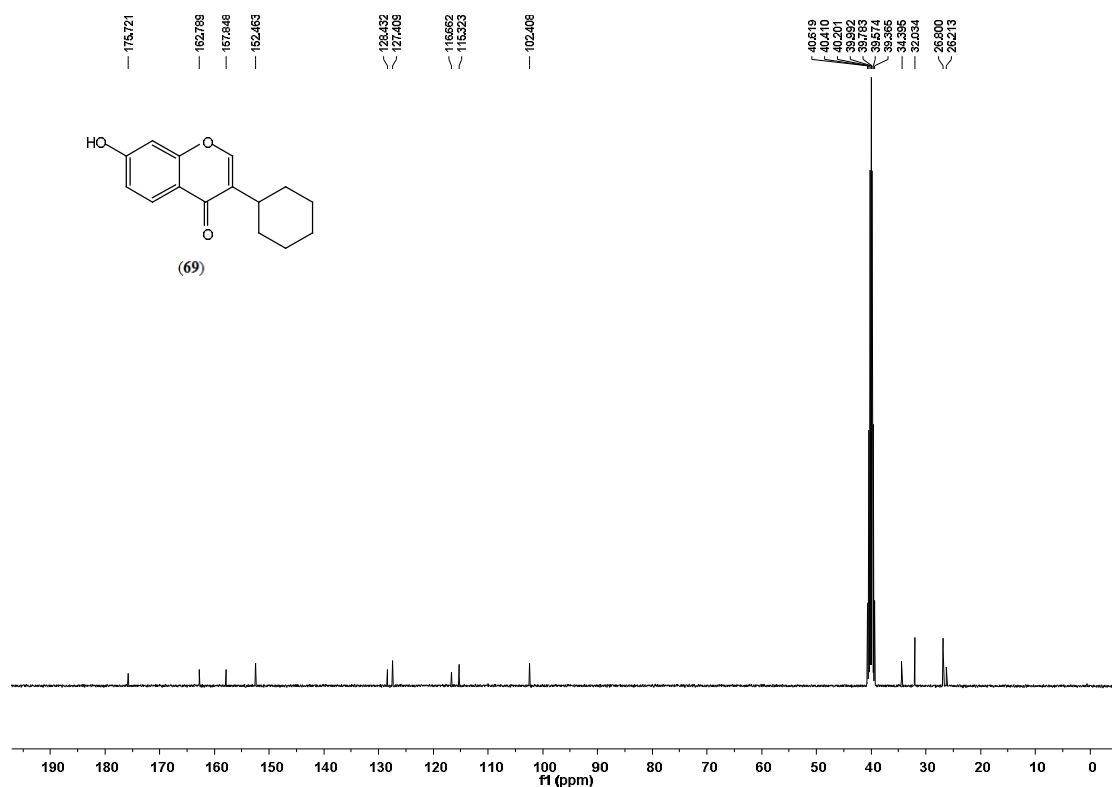

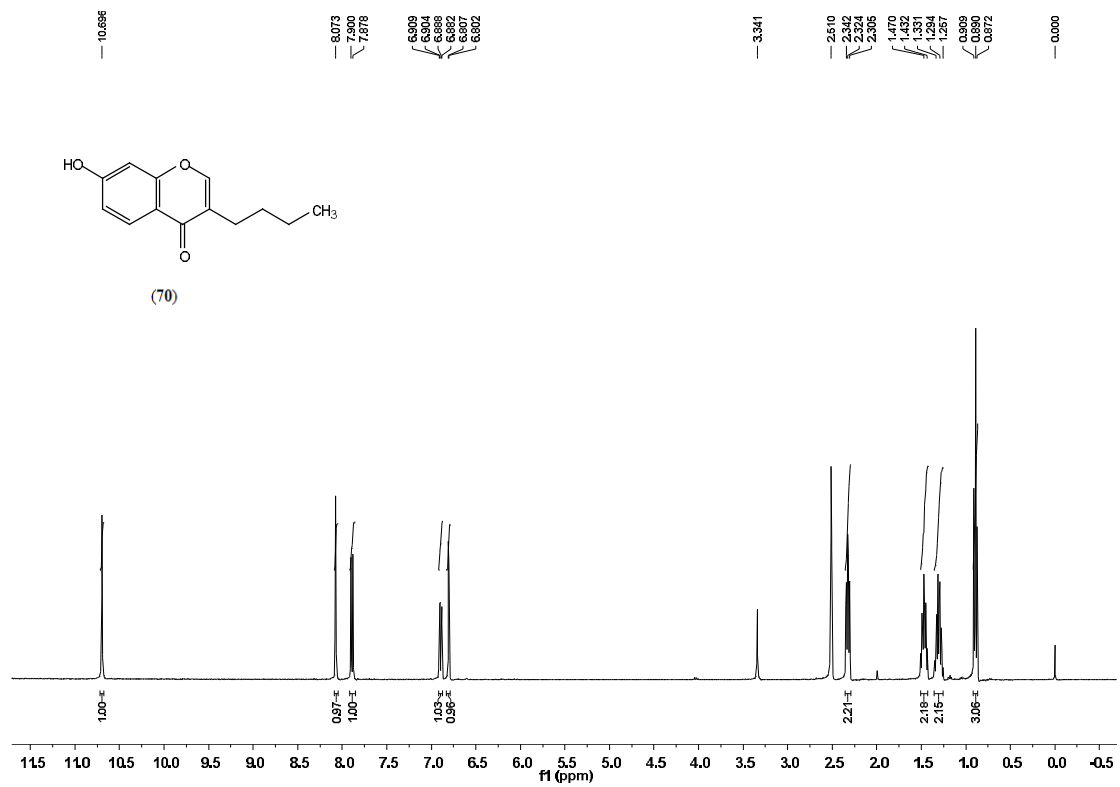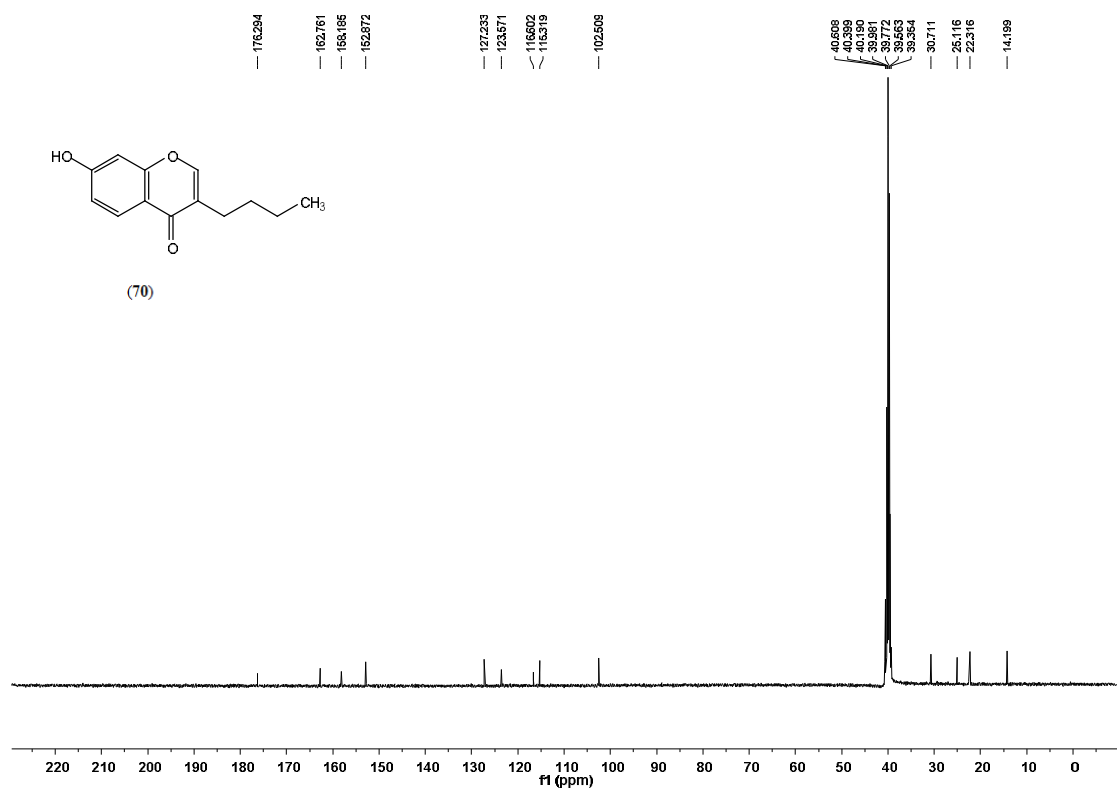

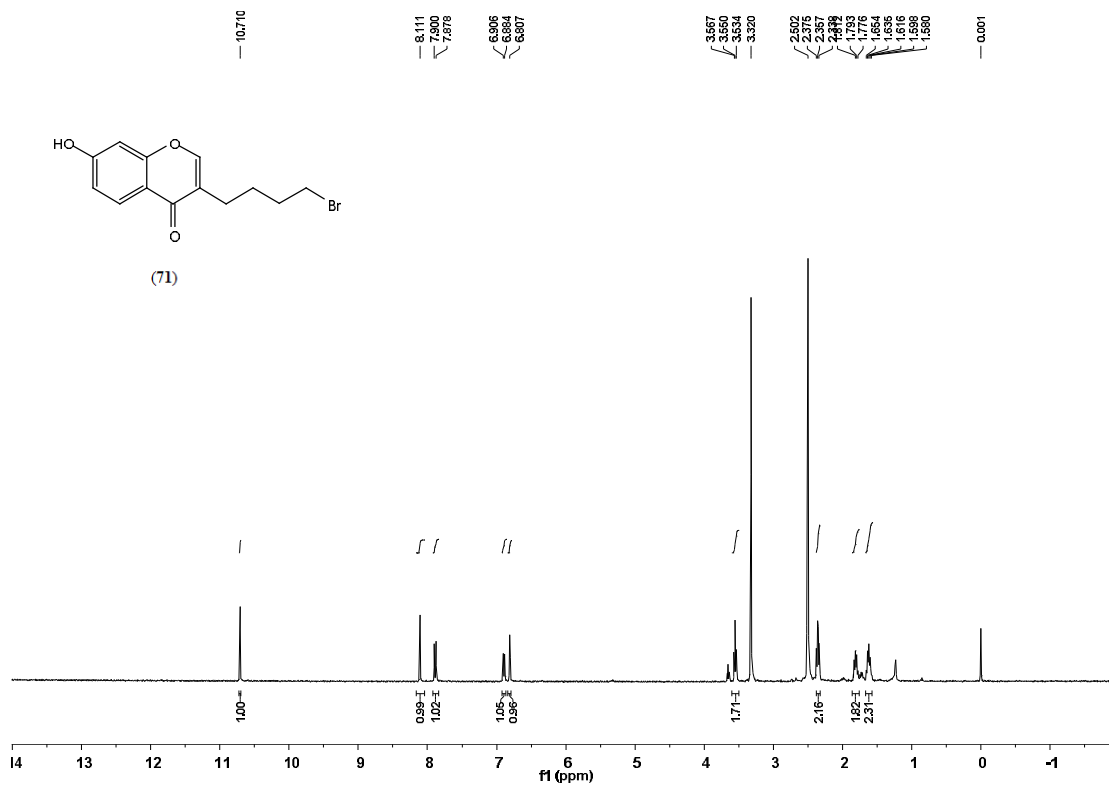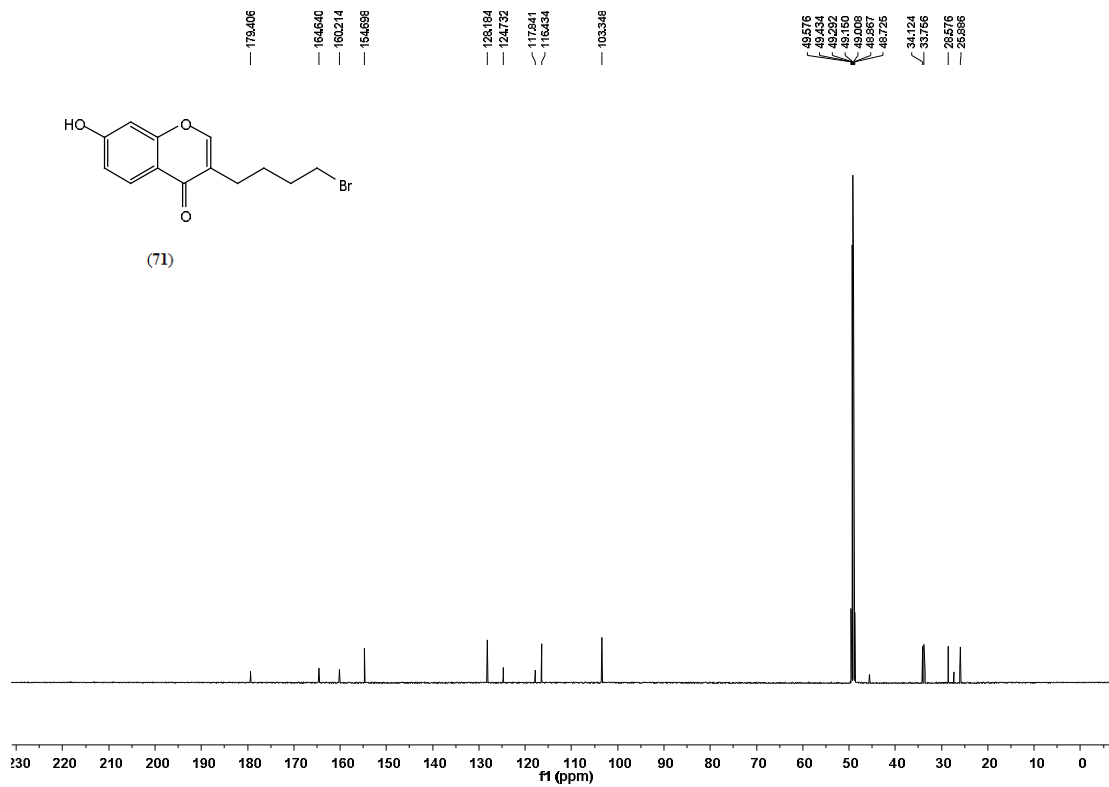

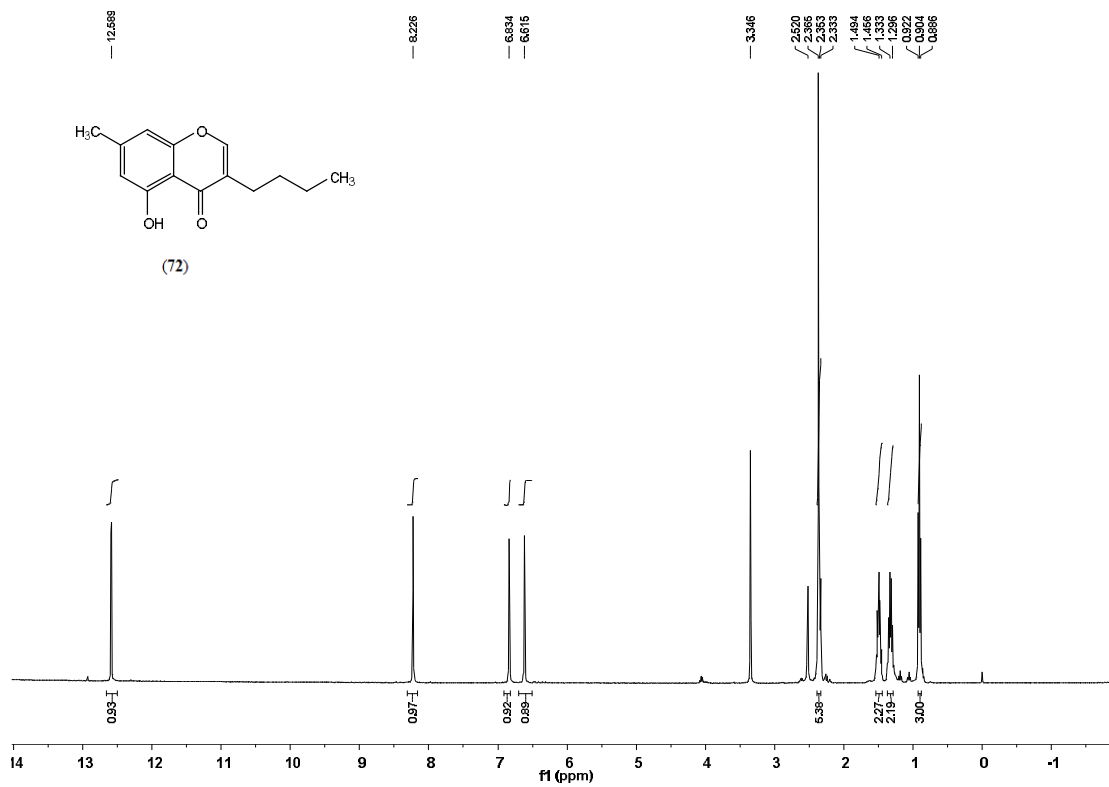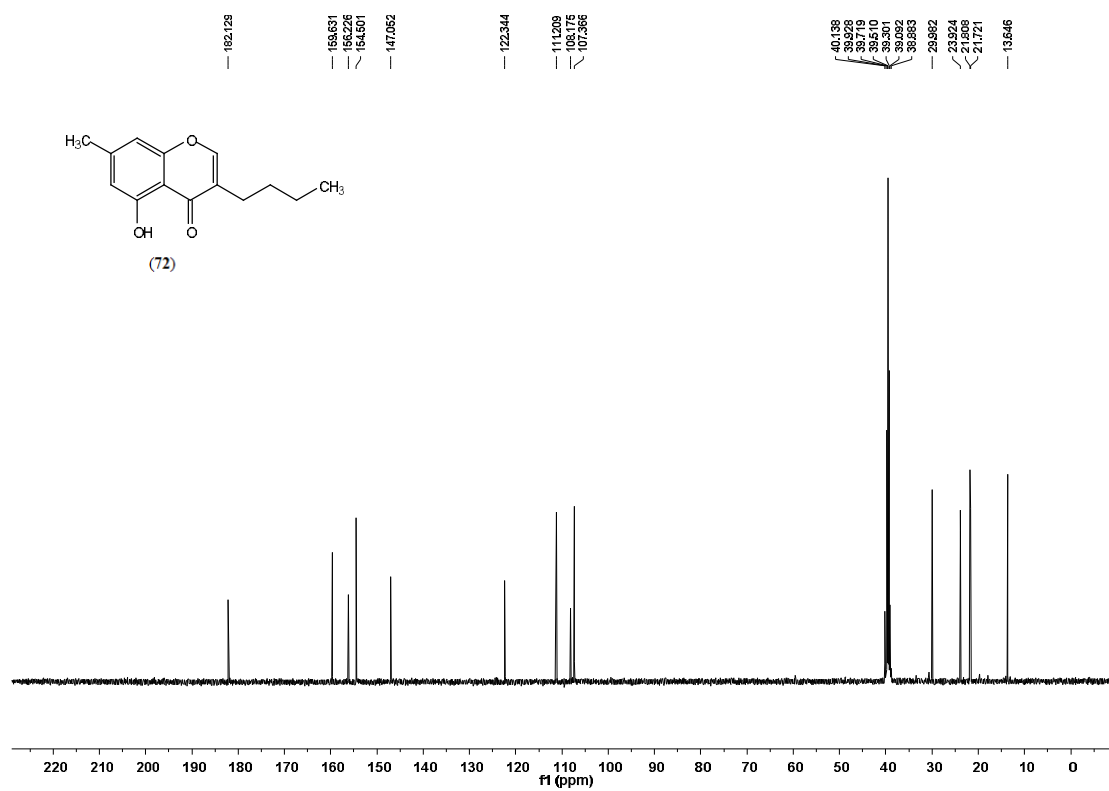

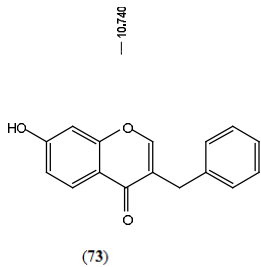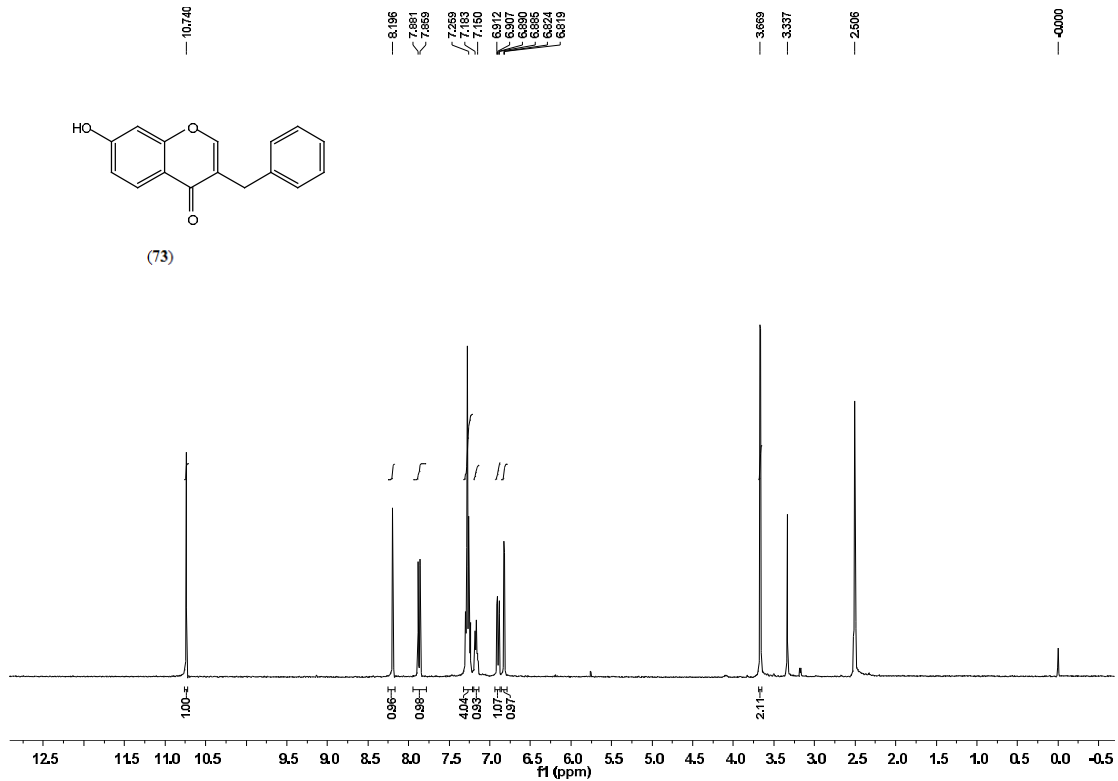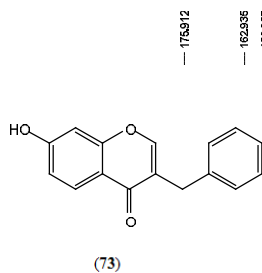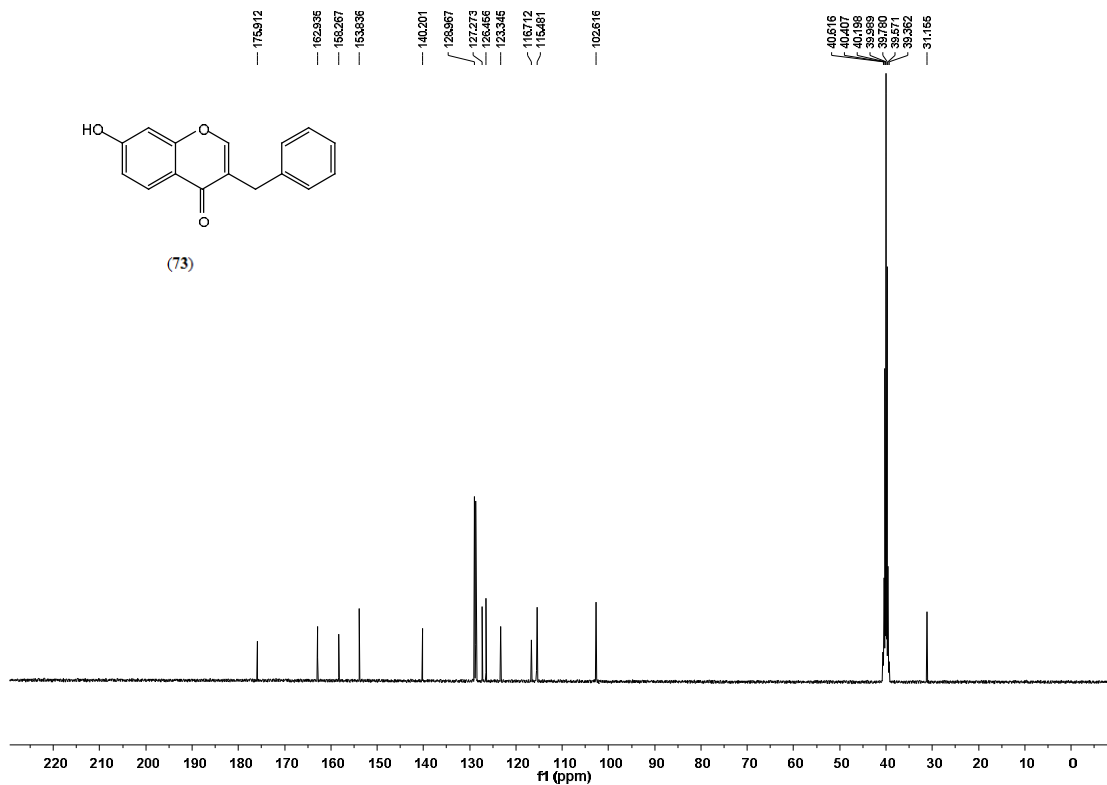



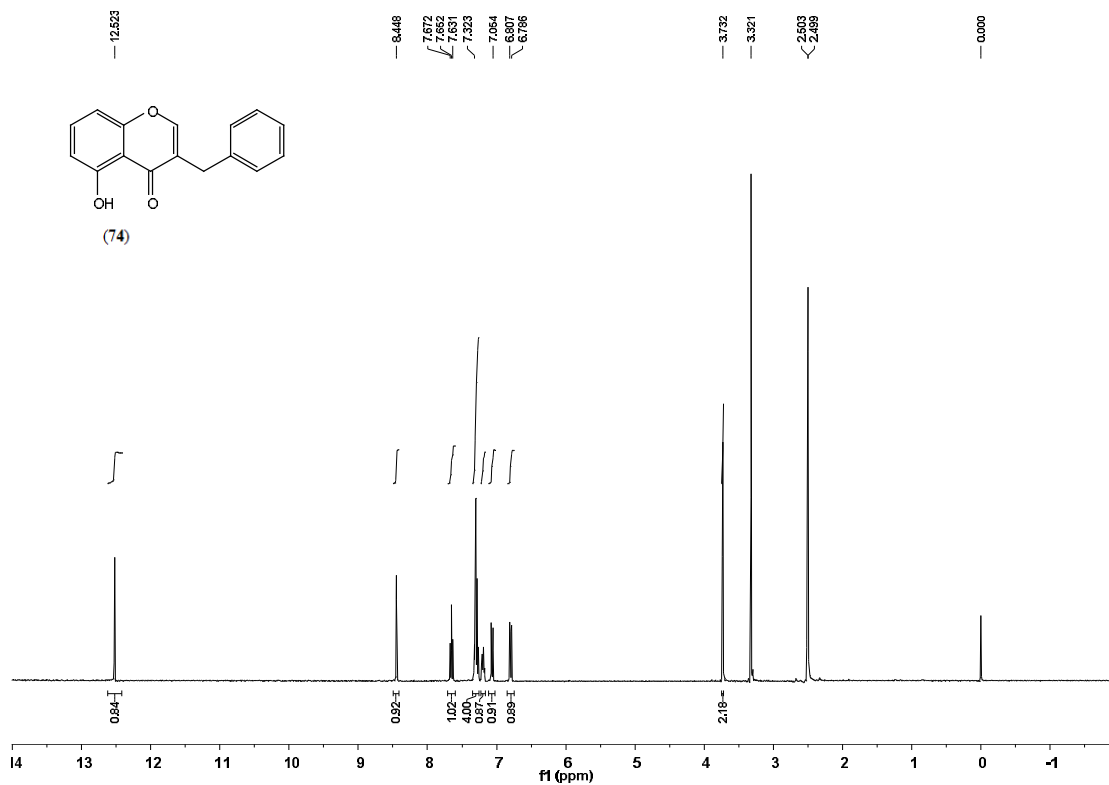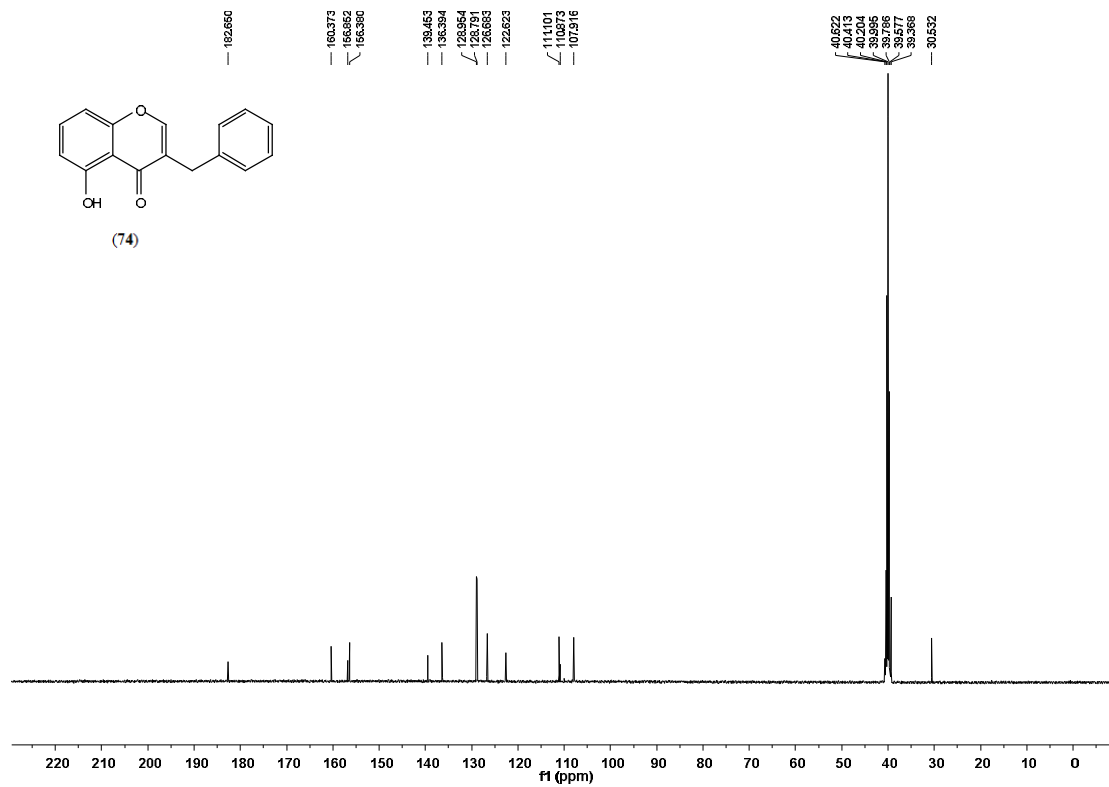

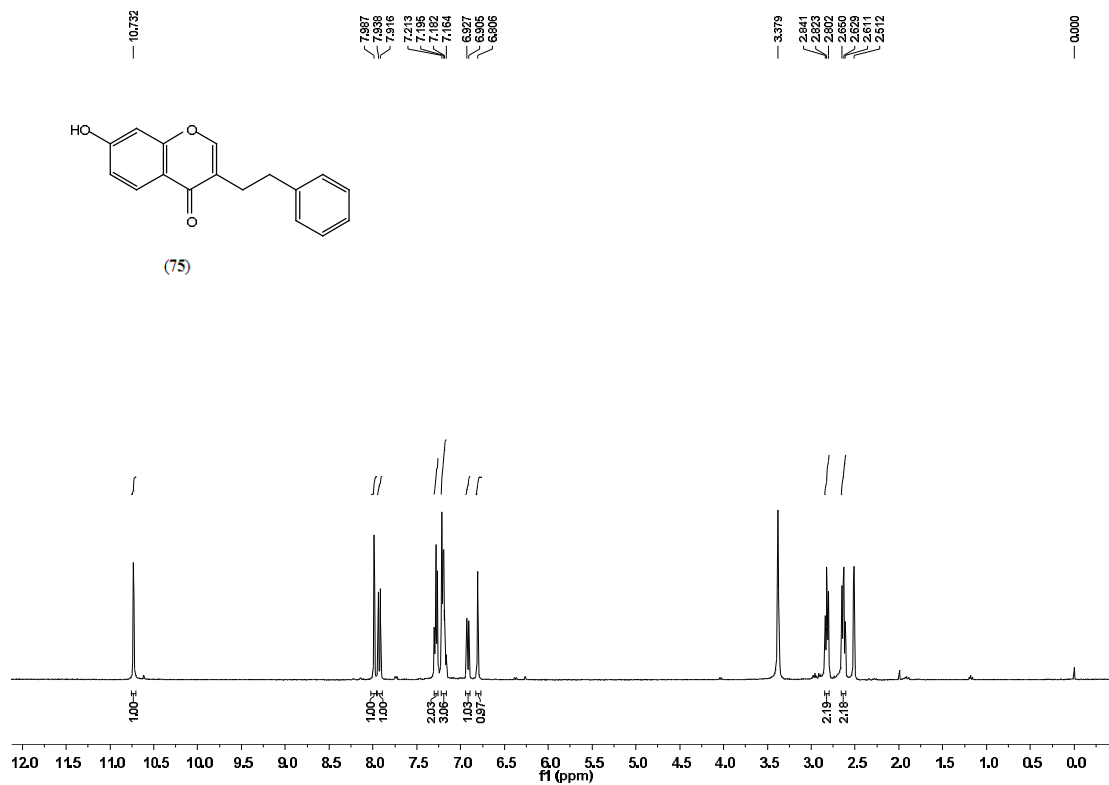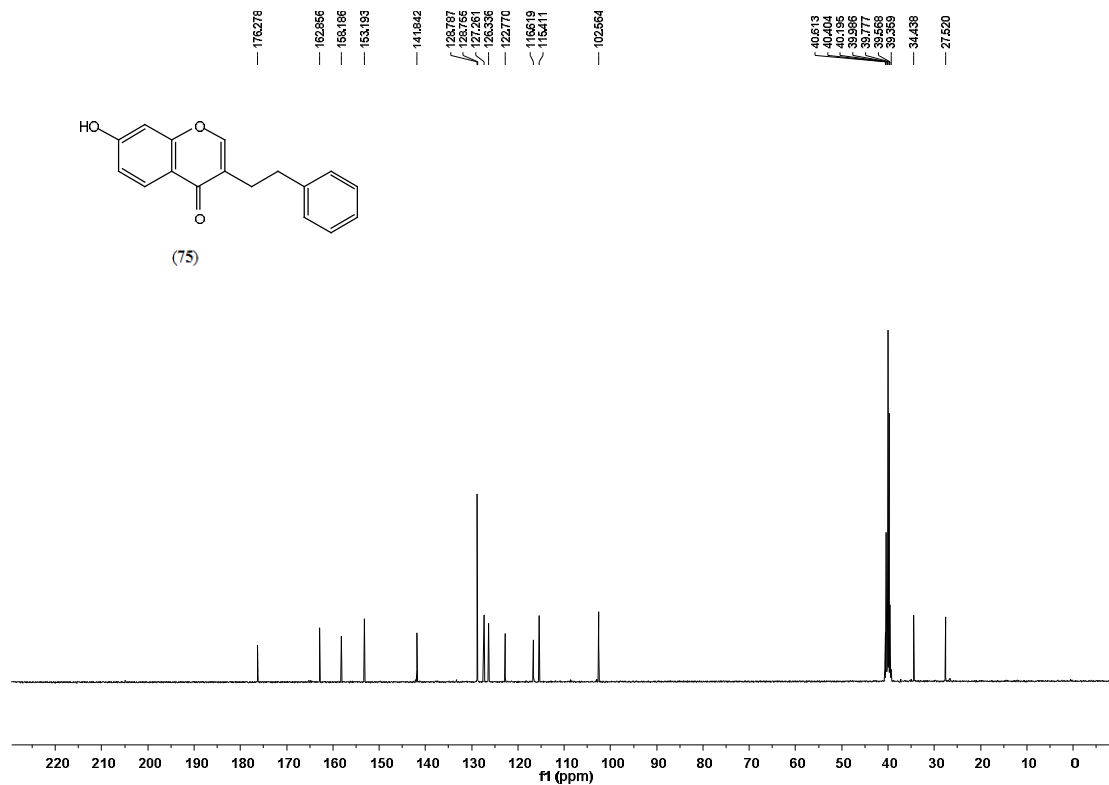

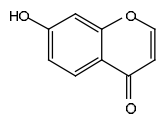

(76)

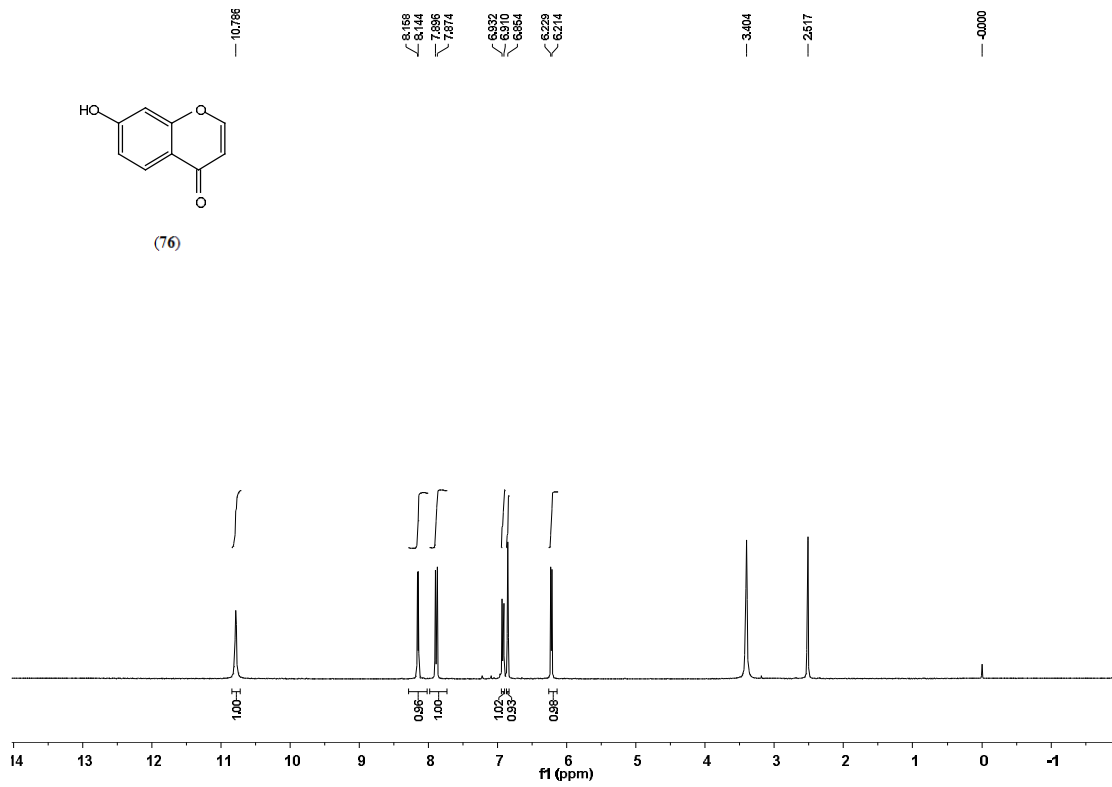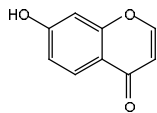

(76)

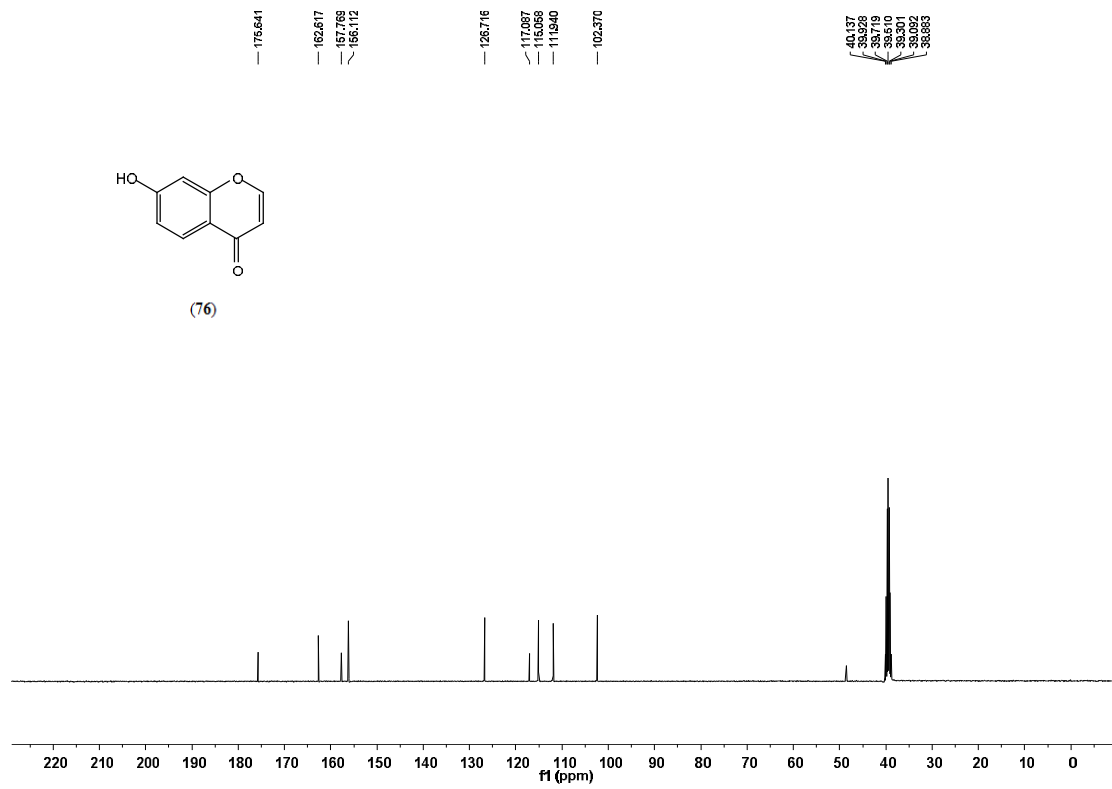

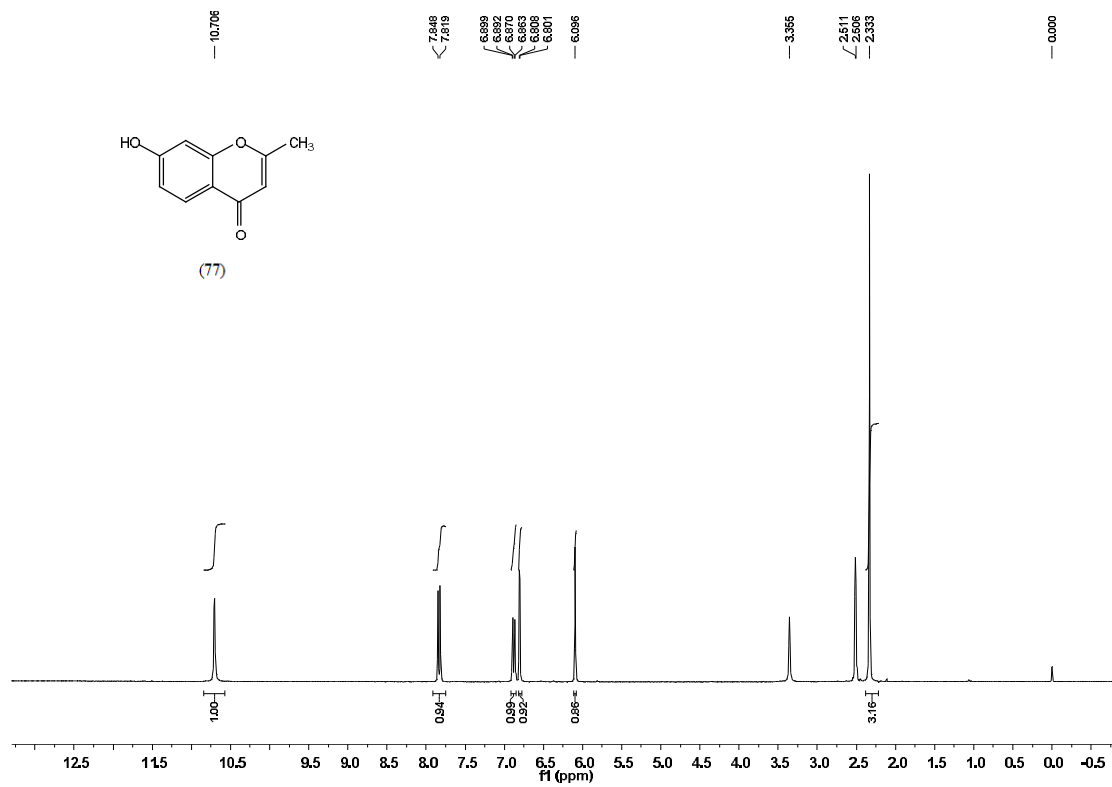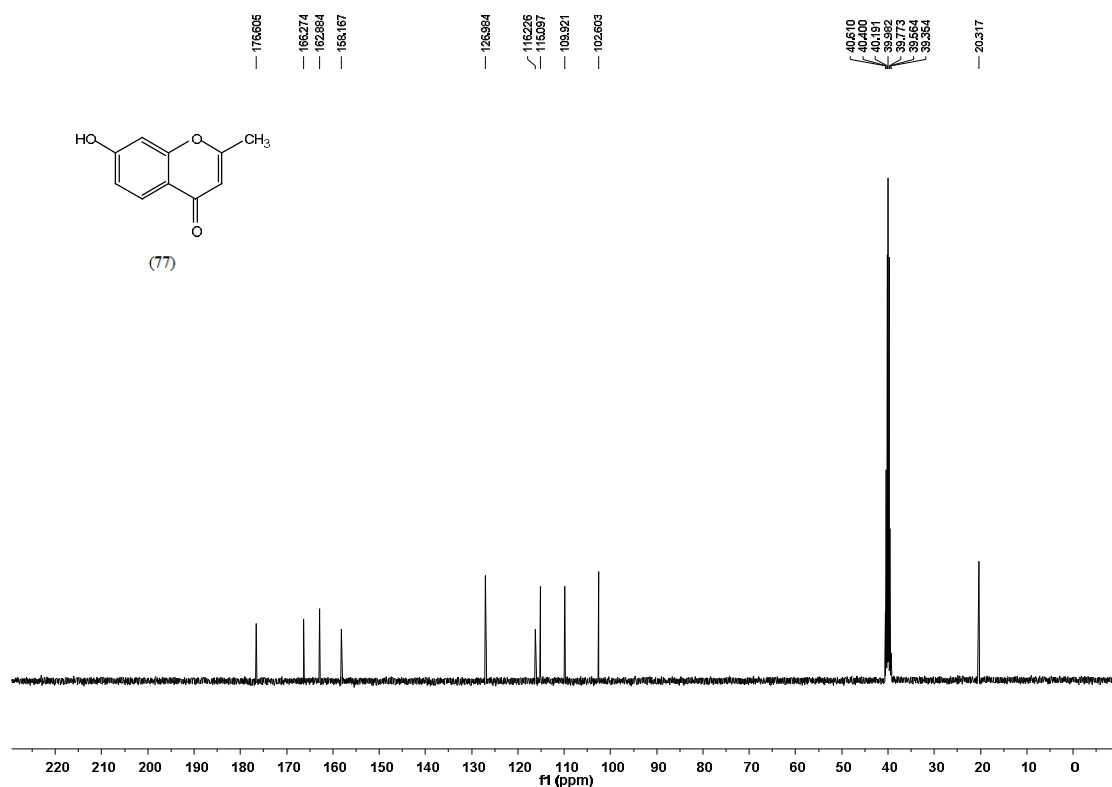

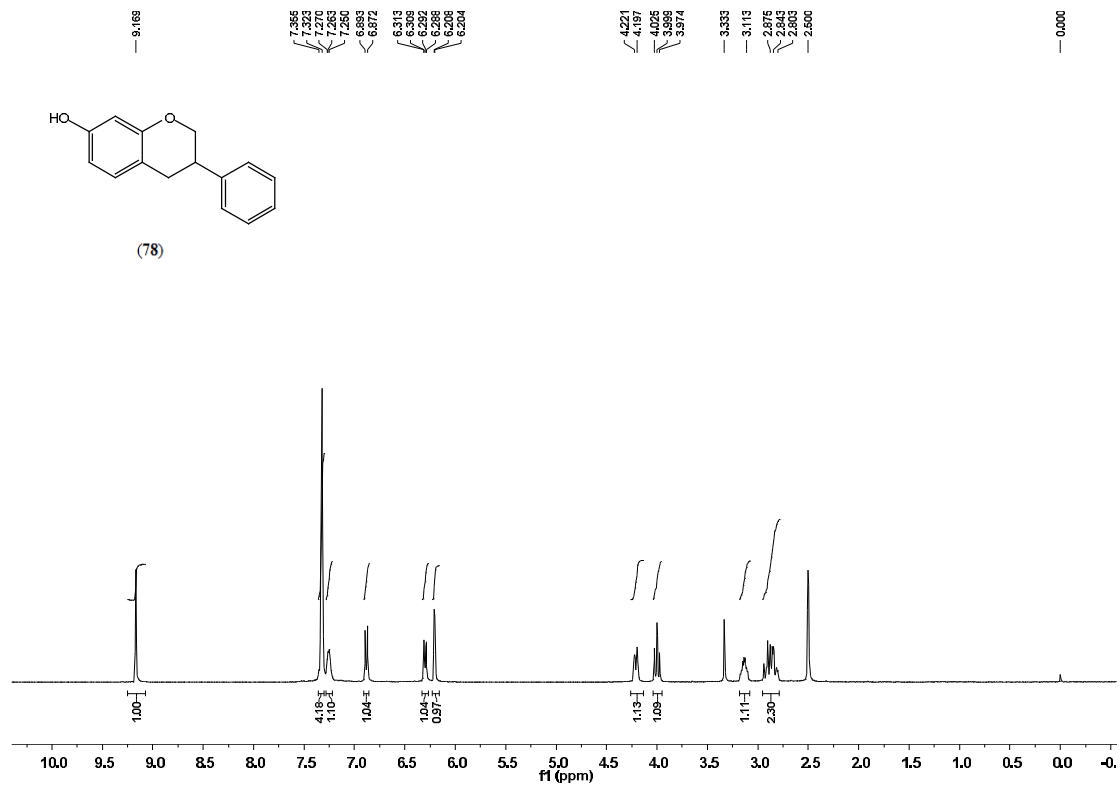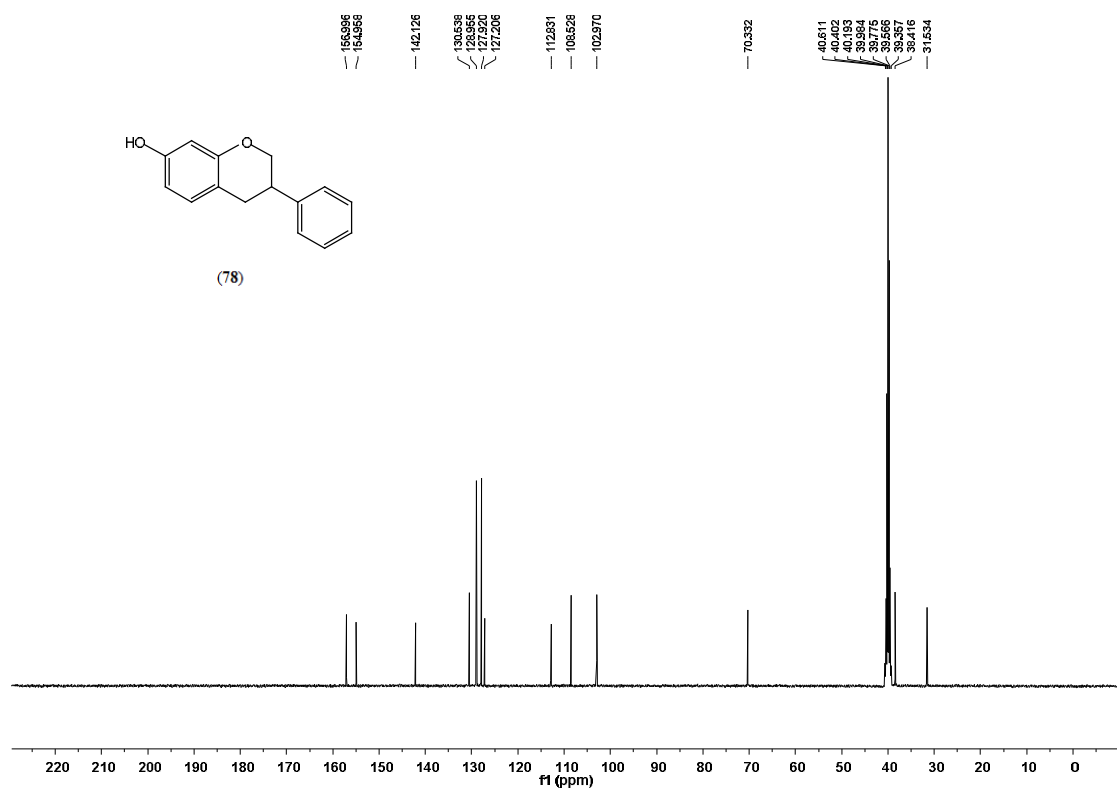

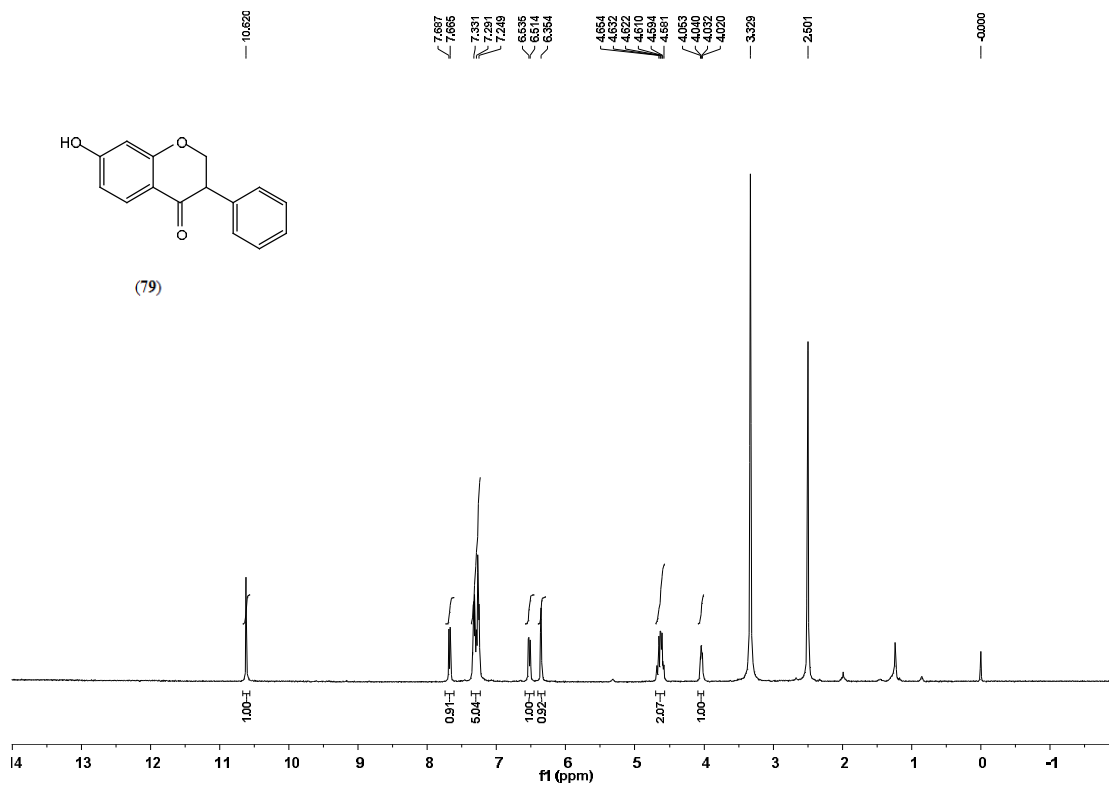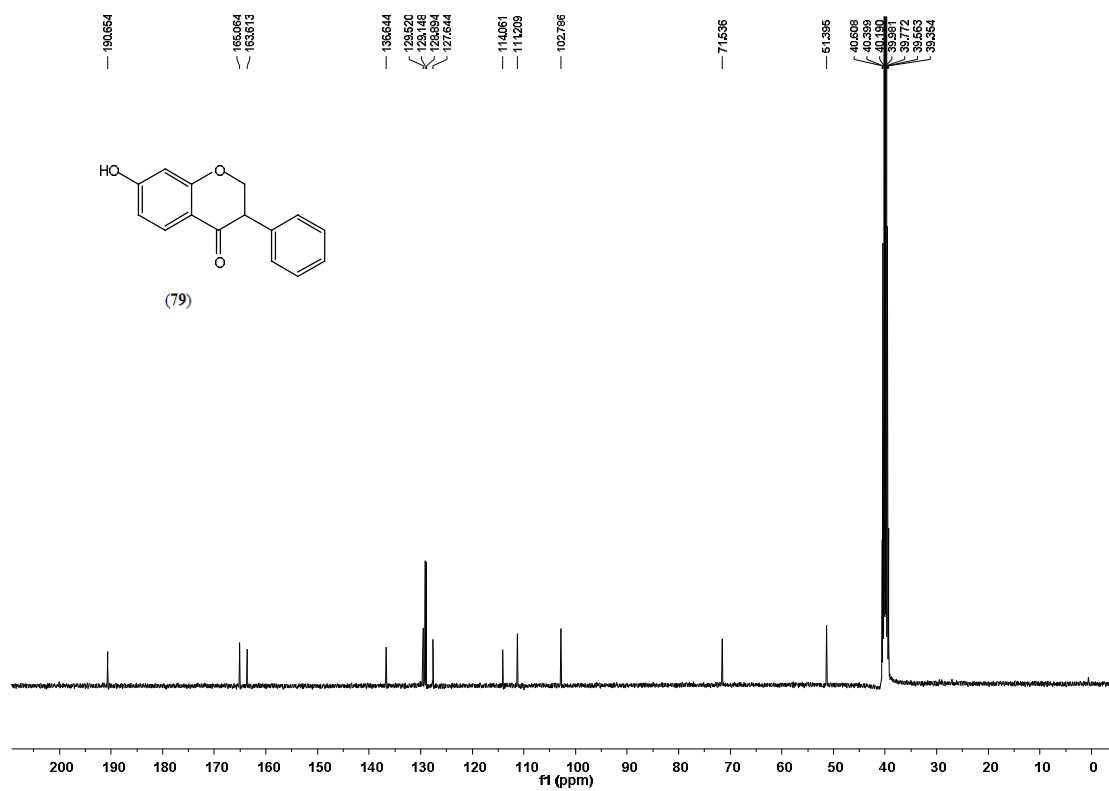

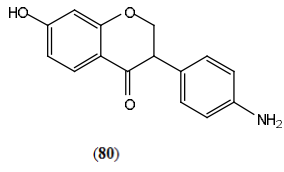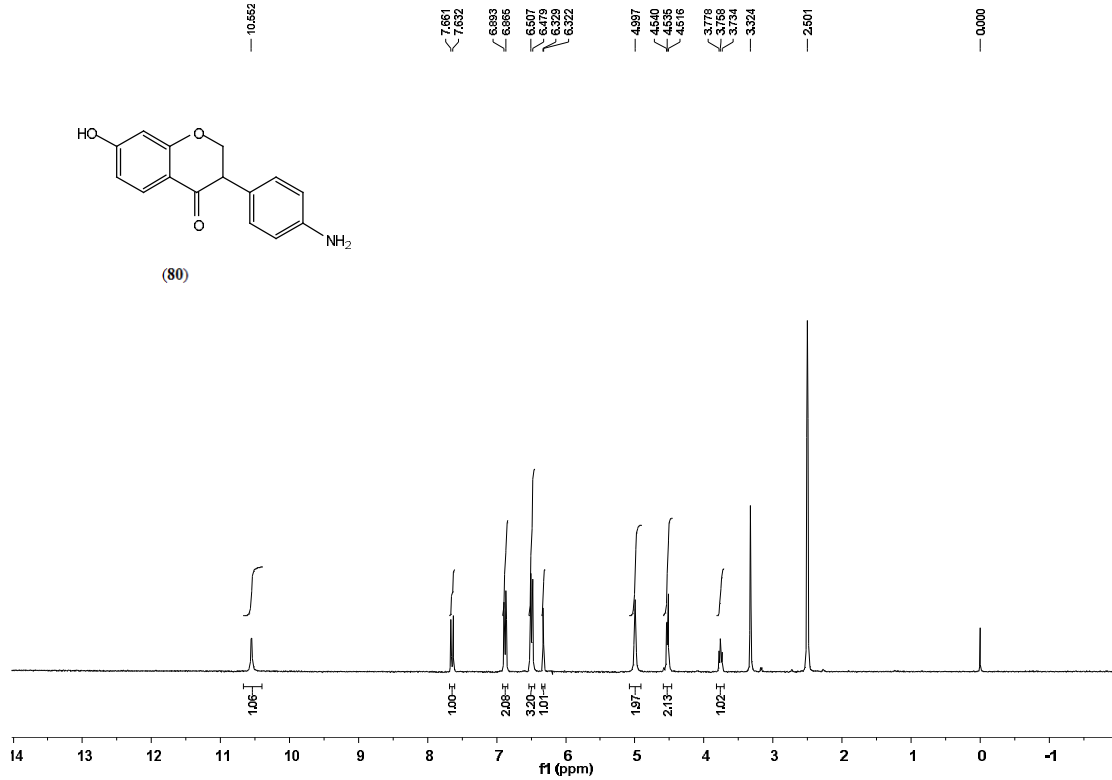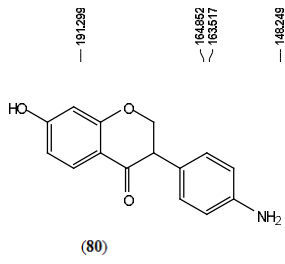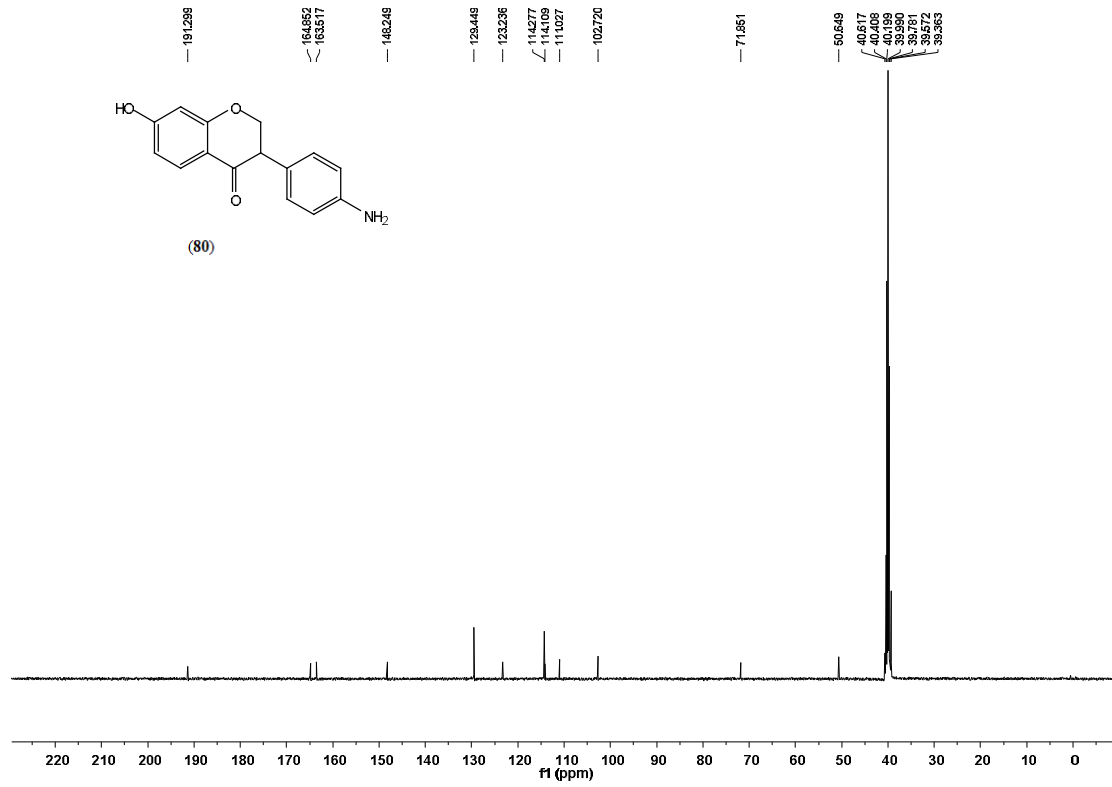

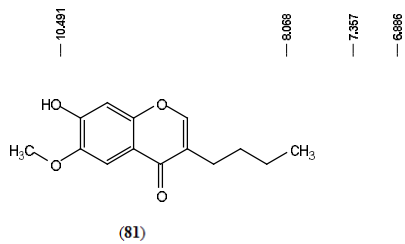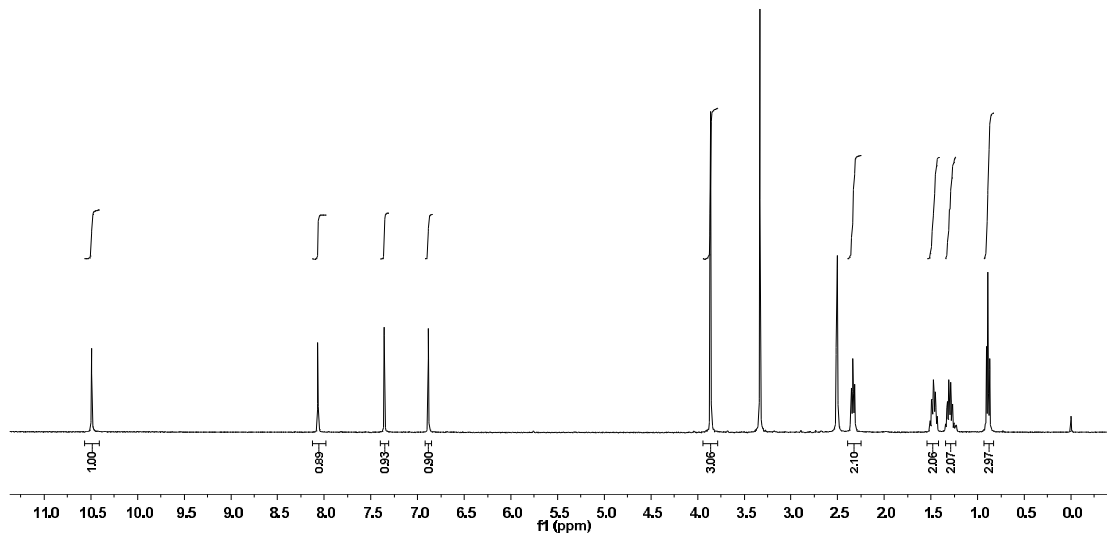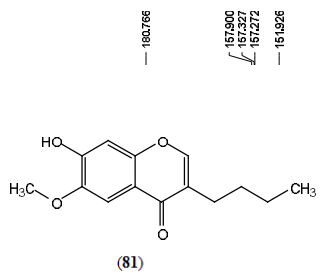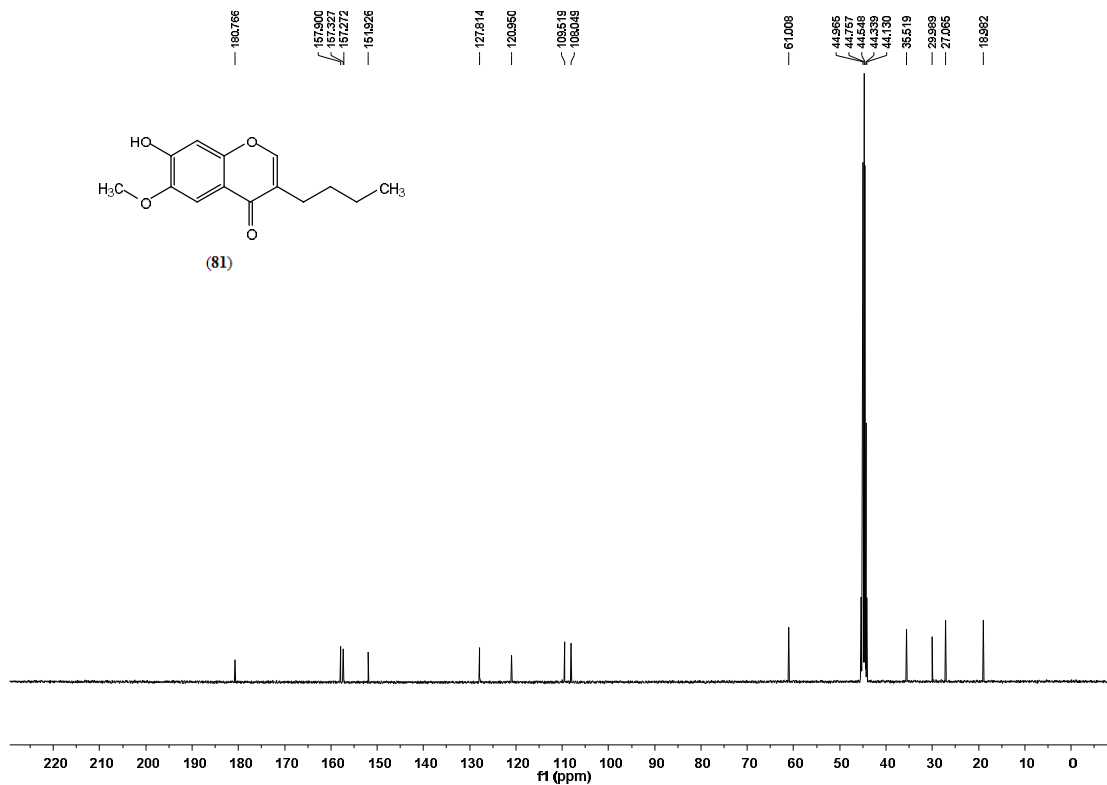



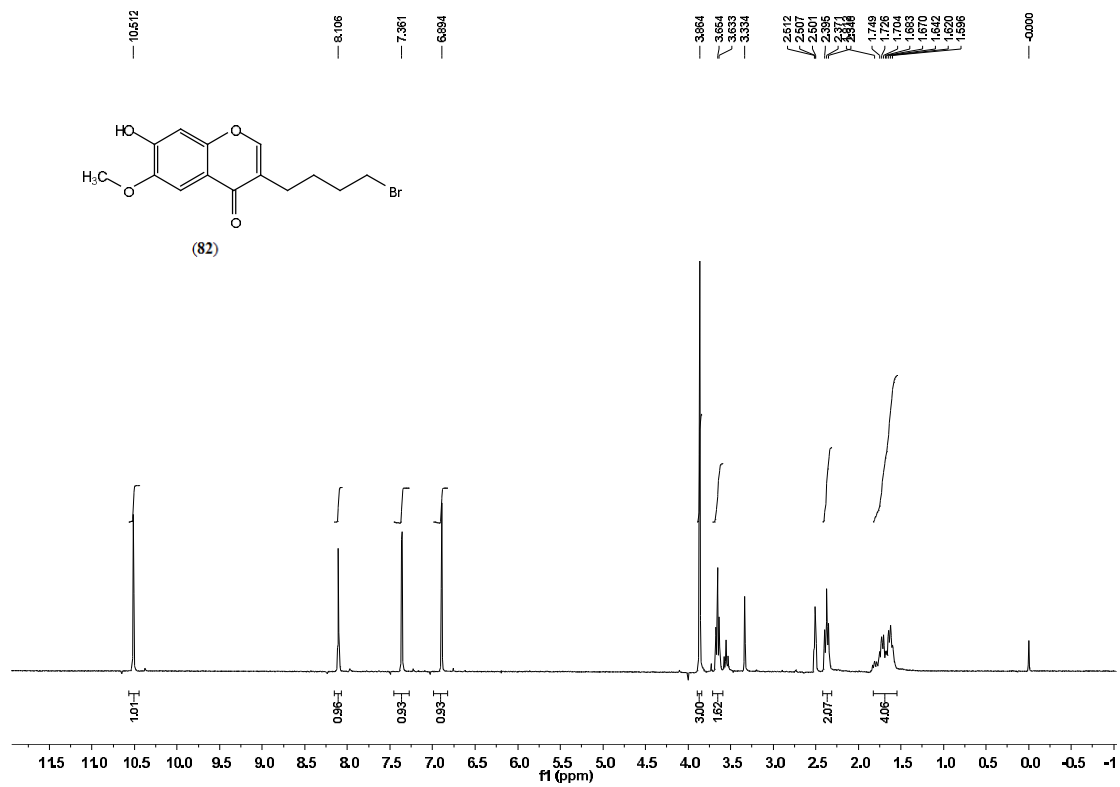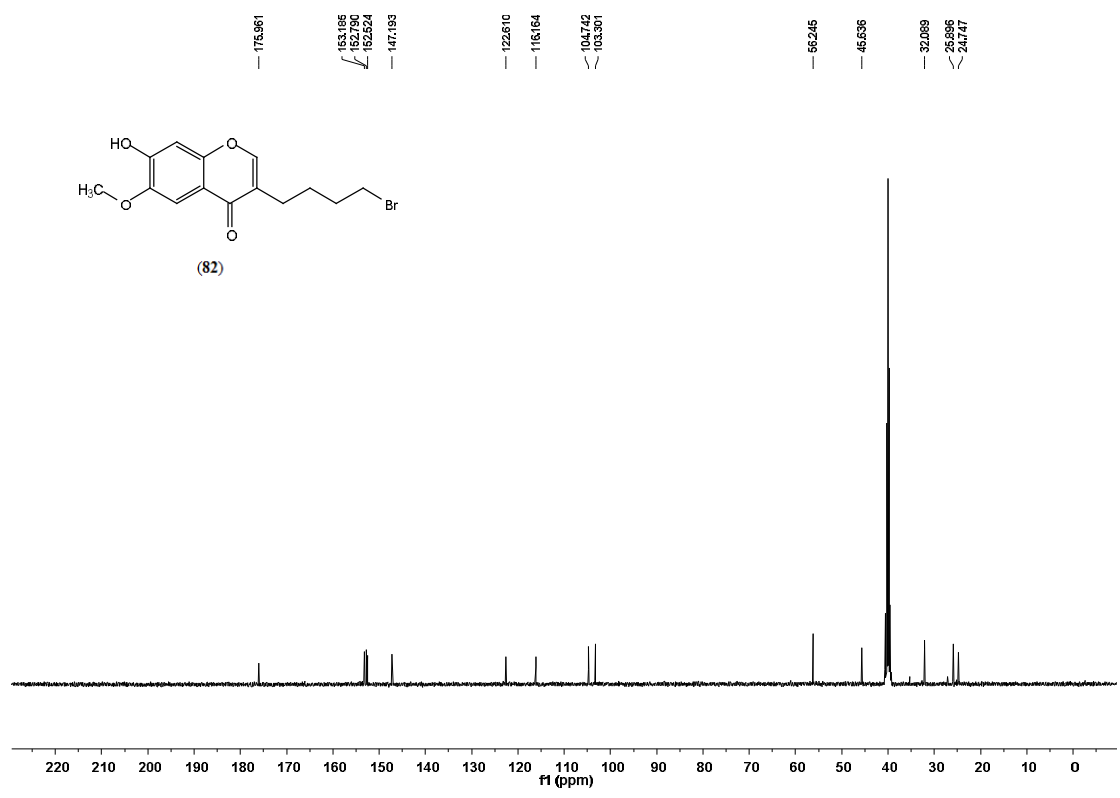

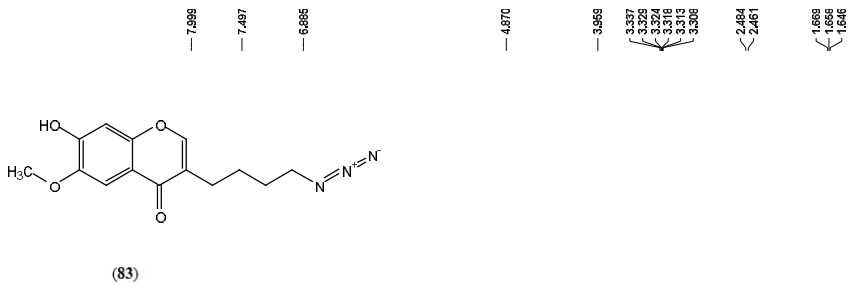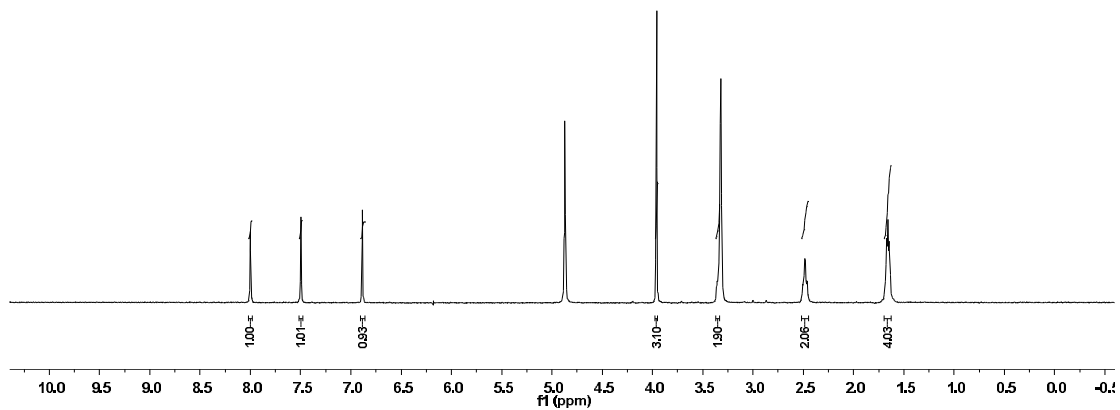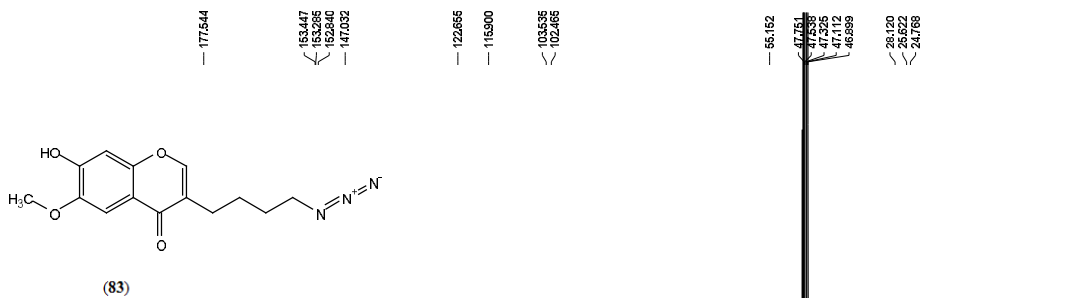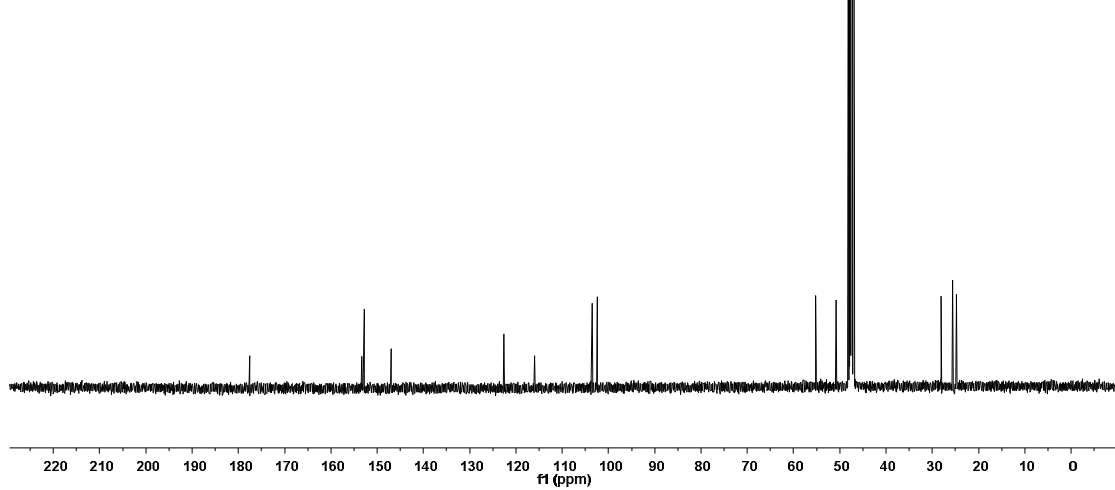

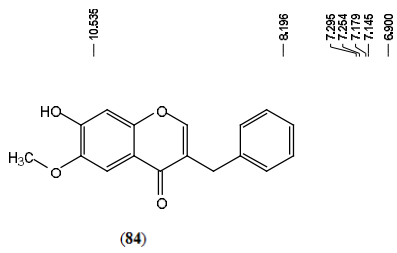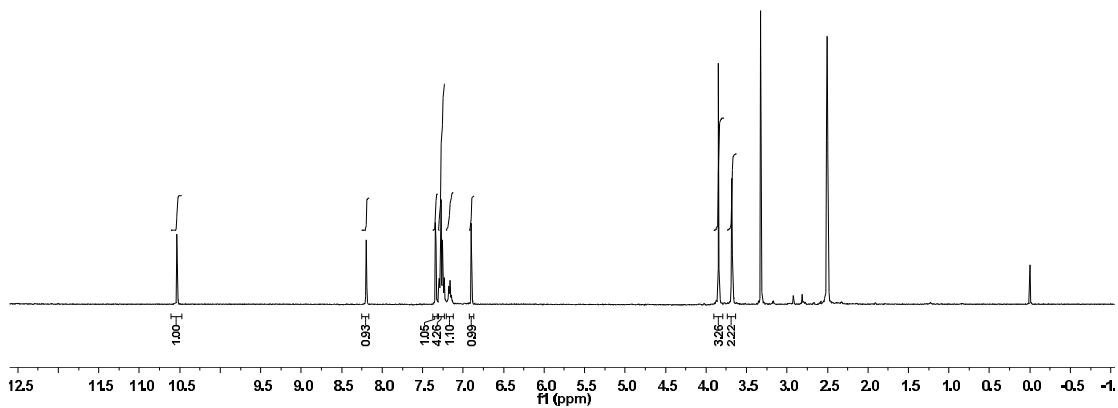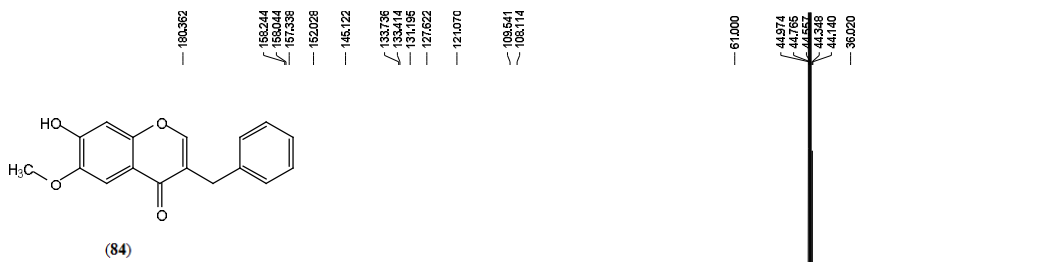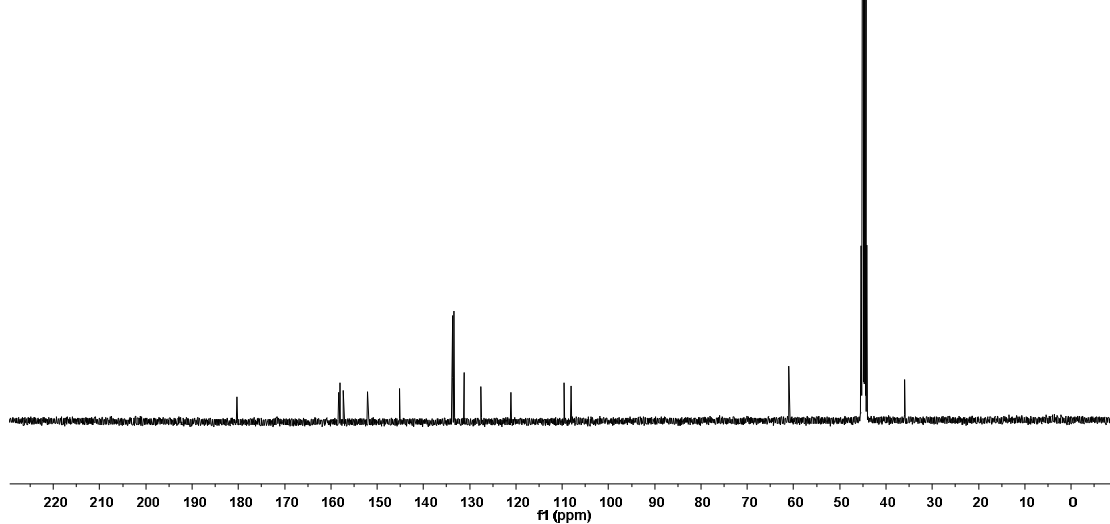

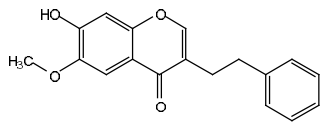

(85)

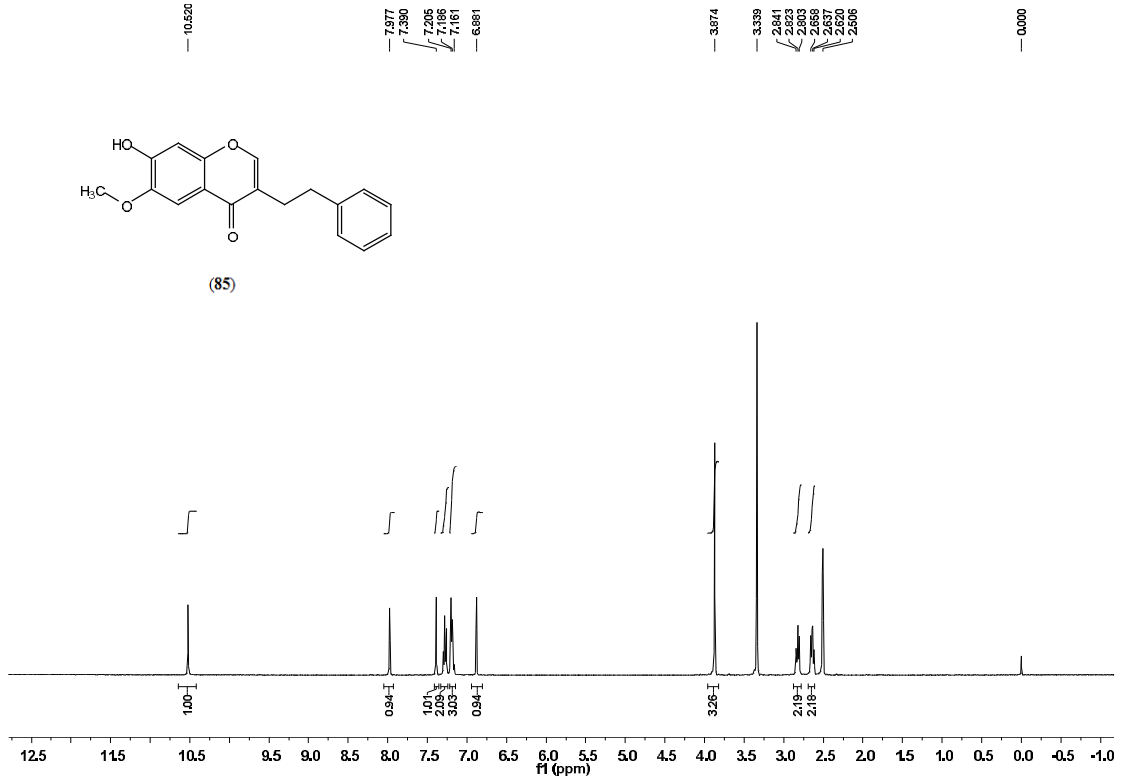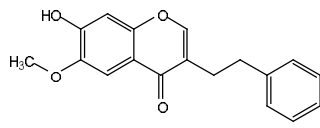

(85)

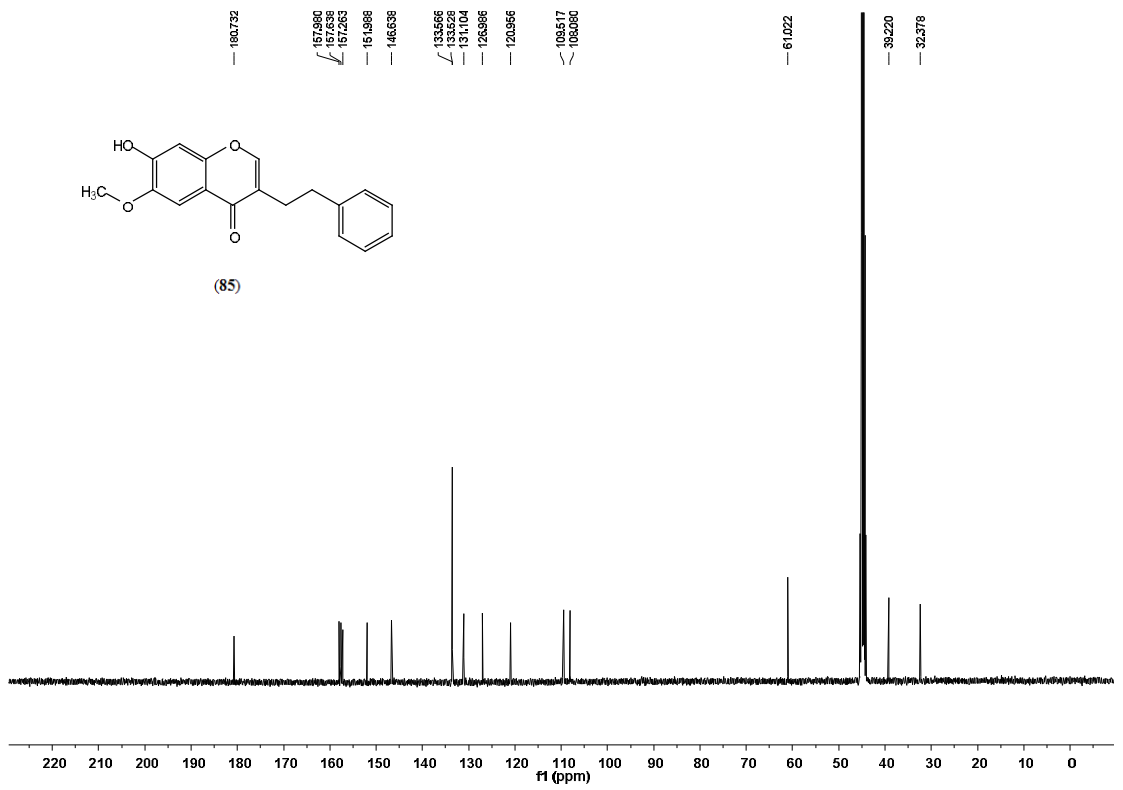

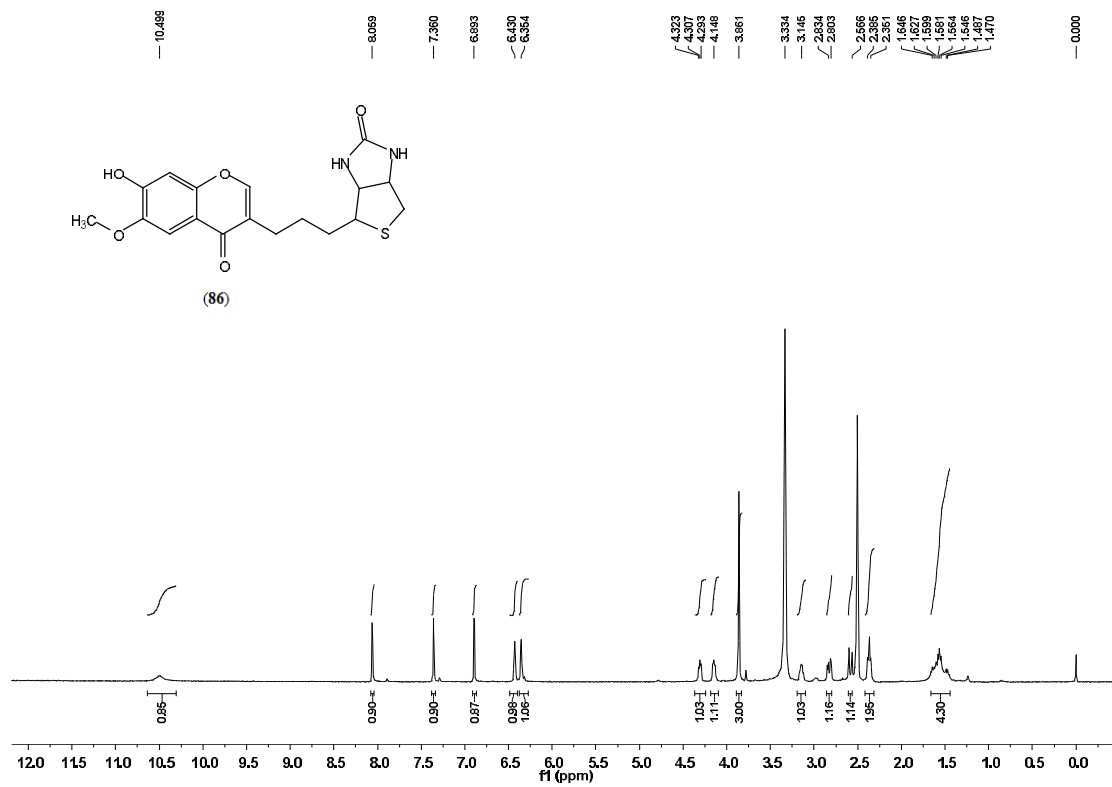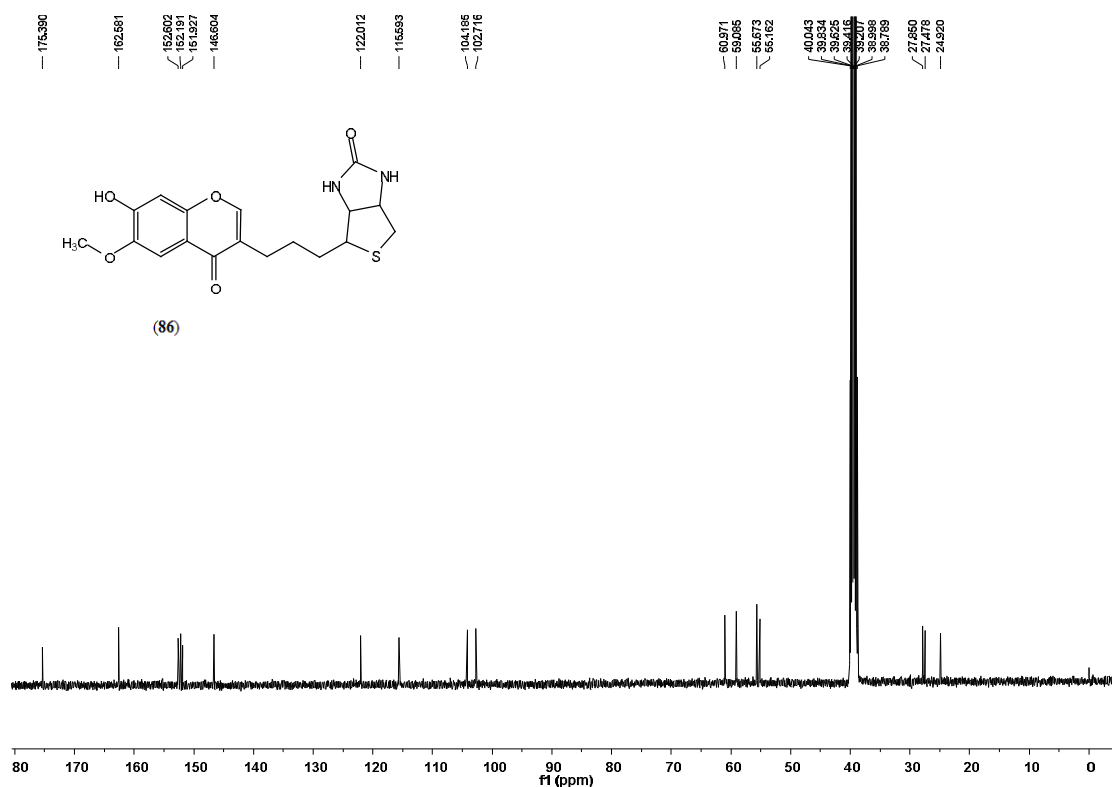

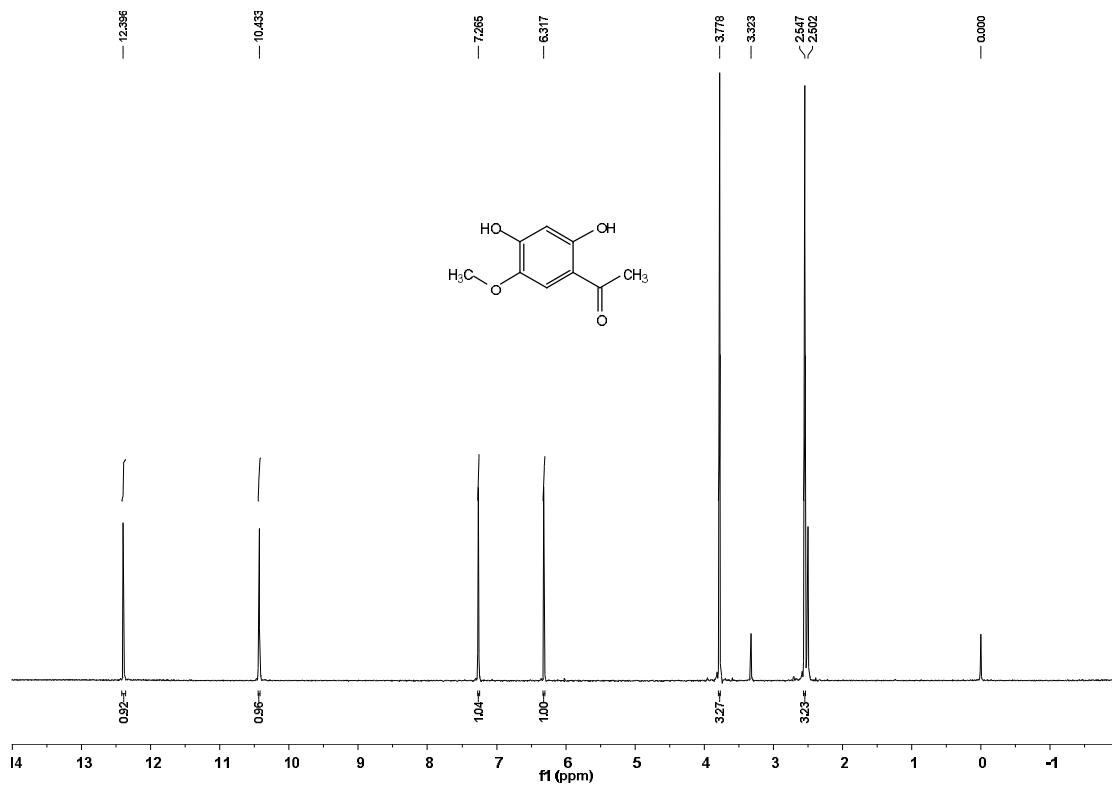

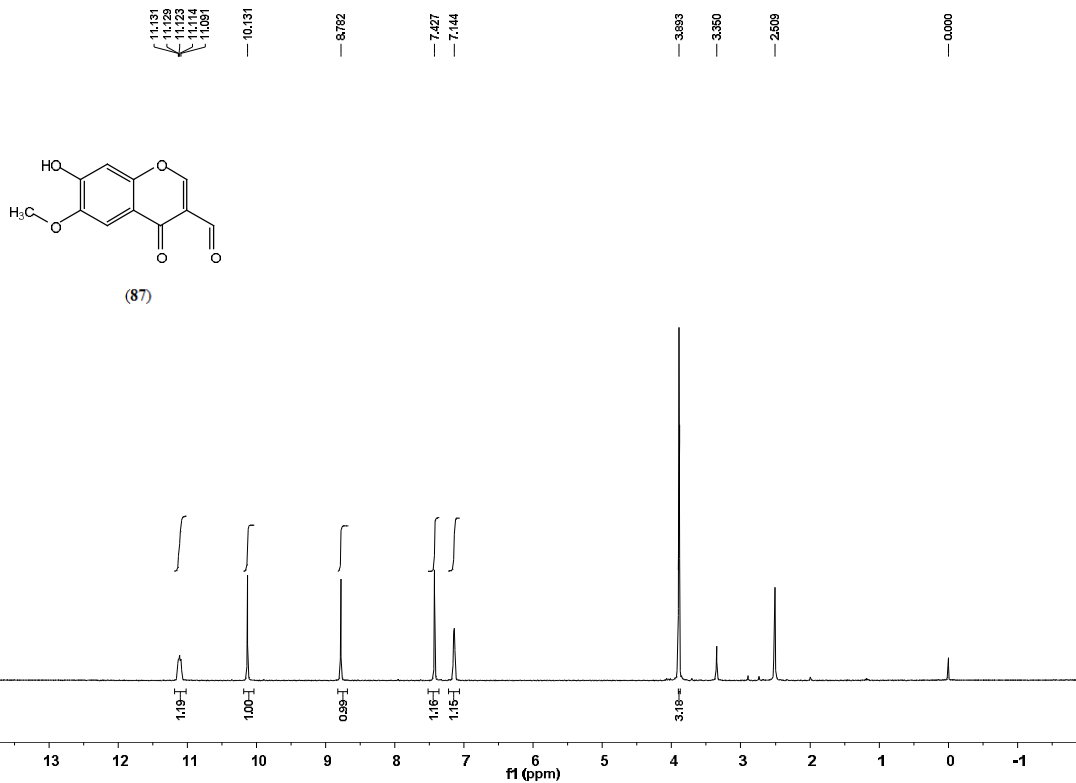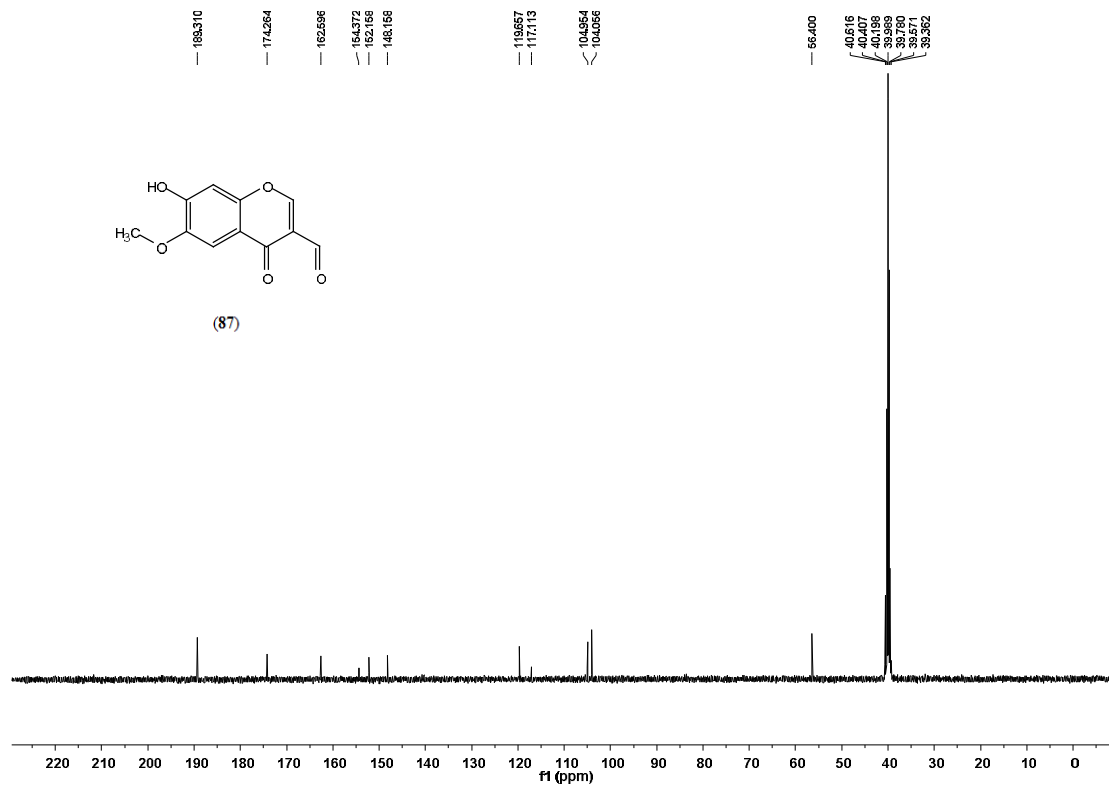

Supplement: c4cc06762b2.pdf [file c4cc06762b2.pdf]
